# Supplementary material for: Synthesis of axially chiral heterobiaryl alkynes via dynamic kinetic asymmetric alkynylation
Source: Royal Society of Chemistry journal article supplement (doi:10.1039/c6cc08997f), 2016-01-01
Supplement: c6cc08997f1.pdf [file c6cc08997f1.pdf]

*Electronic Supporting Information(ESI) for:*

## **Synthesis of Axially Chiral Heterobiaryl Alkynes via Dynamic Kinetic Asymmetric Alkynylation**

*Valentín Hornillos, Abel Ros, Pedro Ramírez-López, Javier Iglesias-Sigüenza, Rosario*

*Fernández and José M. Lassaletta*

### *Table of Contents:*

|                                                                                                              |     |
|--------------------------------------------------------------------------------------------------------------|-----|
| <b>General Information.</b>                                                                                  | 2   |
| <b>Preparation of 1-(Isoquinolin-1-yl)-4-methoxynaphthalen-2-ol.</b>                                         | 2   |
| <b>Synthesis of Nonaflates 1A,C,E. General procedure.</b>                                                    | 3   |
| <b>Full screening results.</b>                                                                               | 4   |
| <b>Reactivity studies using an oxidative addition intermediate <i>OAI</i><sup>+</sup>(<i>OTf</i>).</b>       | 6   |
| <b>Dynamic Kinetic Asymmetric alkynylation employing Quinap ligand L10.</b>                                  | 8   |
| <b>Procedure for the cleavage of TMS-protected alkynes 3Aq, 3Bq, 3Cq.</b>                                    | 23  |
| <b>Preparation of (<i>R</i>)-1-(2-vinylnaphthalen-1-yl)isoquinoline 5.</b>                                   | 24  |
| <b>Preparation of (<i>R</i>)-1-(2-(1-Benzyl-1<i>H</i>-1,2,3-triazol-4-yl)naphthalen-1-yl)isoquinoline 6.</b> | 25  |
| <b>Preparation of (<i>R</i>)-1-(2-Ethynylnaphthalen-1-yl)isoquinoline <i>N</i>-oxide 7.</b>                  | 25  |
| <b>NMR Spectra.</b>                                                                                          | 27  |
| <b>HPLC traces</b>                                                                                           | 67  |
| <b>References</b>                                                                                            | 102 |

## General Information.

$^1\text{H}$  NMR spectra were recorded at 300 MHz or 400 MHz;  $^{13}\text{C}$  NMR spectra were recorded at 75 MHz or 100 MHz with the solvent peak used as the internal reference (7.26 and 77.0 ppm for  $^1\text{H}$  and  $^{13}\text{C}$  respectively for  $\text{CDCl}_3$ ); Column chromatography was performed on silica gel (Merck Kieselgel 60). Analytical TLC was performed on aluminum backed plates (1.5 × 5 cm) pre-coated (0.25 mm) with silica gel (Merck, Silica Gel 60 F<sub>254</sub>). Compounds were visualized by exposure to UV light or by dipping the plates in a solution of 5%  $(\text{NH}_4)_2\text{Mo}_7\text{O}_{24}\cdot 4\text{H}_2\text{O}$  in 95% EtOH (w/v) or followed by heating.

Purging refers to an evacuation/argon refilling procedure carried out three times. Anhydrous 1,4-dioxane, DME and THF were obtained by distillation from sodium using benzophenone as indicator. MeCN was dried by passage through solvent-purification columns containing activated alumina. Anhydrous DIPEA and  $\text{Et}_3\text{N}$  were obtained by distillation from  $\text{CaH}_2$ .  $\text{Pd}(\text{OAc})_2$ ,  $\text{Pd}(\text{dba})_2$ ,  $\text{Pd}_2(\text{dba})_3$ , ligands **L1-L6**, **L9**, anhydrous DMSO and terminal alkynes **a-q** were purchased from Aldrich, **L7**<sup>1</sup> and **L8**<sup>2</sup> were prepared following described procedures. Triflates ( $\pm$ )-**1C** and **1E**<sup>3</sup> and nonaflate **1D**<sup>4</sup> were synthesized according to literature procedures.

## Preparation of 1-(Isoquinolin-1-yl)-4-methoxynaphthalen-2-ol.

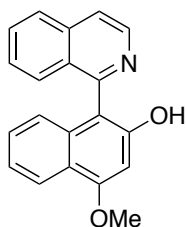

A solution of boronic acid pinacol ester<sup>5</sup> (1.9 g, 5.0 mmol) in THF (50 mL) was treated with a 1:1 mixture of  $\text{H}_2\text{O}_2$  (30%)/ $\text{NaOH}$  (20 mL, 2M, aq.). After stirring for 30 min at room temperature, the reaction mixture was diluted with  $\text{CH}_2\text{Cl}_2$  (5 mL) and washed with  $\text{NH}_4\text{Cl}$  (aq.) The organic layer was dried over  $\text{MgSO}_4$ , filtered, concentrated, and the residue was purified by flash chromatography on silica gel (1:1 EtOAc/*n*-hexane) to give the corresponding alcohol (1.28 g, 85 %) as a yellow amorphous solid.  $^1\text{H}$  NMR (400 MHz,  $\text{CDCl}_3$ ):  $\delta$  8.51 (d,  $J$  = 5.7 Hz, 1H), 8.22 (d,  $J$  = 8.0 Hz, 1H), 7.91 (d,  $J$  = 8.2 Hz, 1H), 7.72-7.67 (m, 2H), 7.65 (d,  $J$  = 8.6 Hz, 1H), 7.39 (t,  $J$  = 7.6 Hz, 1H), 7.29 (t,  $J$  = 7.9 Hz, 1H), 7.21 (t,  $J$  = 7.6 Hz, 1H), 7.03 (d,  $J$  = 8.4 Hz, 1H), 6.34 (s, 1H), 3.67 (s, 3H).  $^{13}\text{C}$  NMR (100 MHz,  $\text{CDCl}_3$ ):  $\delta$  158.2, 157.2, 154.9, 141.2, 137.1, 133.8, 130.7, 128.6, 128.5, 127.2, 126.9, 126.8, 124.5, 122.4, 121.2, 120.4, 110.5, 98.3, 55.3. HRMS(EI) calcd. for  $\text{C}_{20}\text{H}_{15}\text{NO}_2$  ( $\text{M}^+$ ) 301.1103. Found 301.1108.

## Synthesis of Nonaflates 1A,C,E. General procedure.

Following a described procedure,<sup>6</sup> over a suspension of alcohol precursor (1.0 equiv) and K<sub>2</sub>CO<sub>3</sub> (1.5 equiv) in dry acetonitrile (0.5 M), perfluorobutanesulfonyl fluoride (90%, 1.2 equiv) was added in one portion, and the resulting mixture was vigorously stirred for 24 h. After completion (TLC checking), the reaction mixture was filtered through a Celite pad, the solvent was removed in vacuum, and the residue was purified by flash column chromatography over silica gel.

### 1-(Isoquinolin-1-yl)naphthalen-2-yl nonaflate 1A.

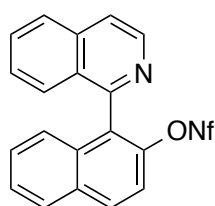

Following the general procedure starting from 1-(isoquinolin-1-yl)naphthalen-2-ol<sup>7</sup> (1.35 g, 4.98 mmol), column chromatography (85:15 *n*-hexane/AcOEt) afforded **1A** (2.22 g, 80%) as a white foam. <sup>1</sup>H NMR (400 MHz, CDCl<sub>3</sub>): δ 8.76 (d, *J* = 5.7 Hz, 1H), 8.10 (d, *J* = 9.1 Hz, 1H), 7.98 (dd, *J* = 13.2, 8.3 Hz, 2H), 7.83 (d, *J* = 5.7 Hz, 1H), 7.72 (dt, *J* = 8.2, 4.0 Hz, 1H), 7.65-7.52 (m, 2H), 7.49-7.36 (m, 3H), 7.31-7.21 (m, 1H). <sup>13</sup>C NMR (100 MHz, CDCl<sub>3</sub>): δ 154.0, 145.0, 142.6, 136.3, 133.2, 132.5, 131.2, 130.5, 129.4, 128.4, 128.2, 127.8, 127.7, 127.1, 127.0, 126.7, 126.5, 121.2, 119.5, (nanaflate group not observed). <sup>19</sup>F NMR (377 MHz, CDCl<sub>3</sub>): -80.8 (t, *J*<sub>F-P</sub> = 11 Hz), -110.2 (t, *J*<sub>F-P</sub> = 15 Hz), -121.2 (m), -126.0 (m).

### 1-(Isoquinolin-1-yl)-4-methoxynaphthalen-2-yl 1E

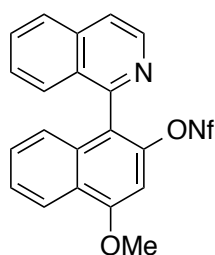

Following the general procedure starting from 1-(isoquinolin-1-yl)-4-methoxynaphthalen-2-ol<sup>4</sup> (393 mg, 1.30 mmol), column chromatography (85:15 *n*-hexane/AcOEt) afforded **1E** (571 mg, 75%) as a white foam. <sup>1</sup>H NMR (400 MHz, CDCl<sub>3</sub>): δ 8.75 (d, *J* = 5.6 Hz, 1H), 8.38 (d, *J* = 8.5 Hz, 1H), 7.94 (d, *J* = 8.3 Hz, 1H), 7.80 (d, *J* = 5.7 Hz, 1H), 7.69 (t, *J* = 7.5 Hz, 1H), 7.57-7.35 (m, 4H), 7.22 (d, *J* = 8.5 Hz, 1H), 6.91 (s, 1H), 4.13 (d, *J* = 1.5 Hz, 3H). <sup>13</sup>C NMR (100 MHz, CDCl<sub>3</sub>): δ 157.5, 154.2, 145.2, 142.6, 136.4, 133.4, 130.4, 128.8, 128.4, 127.5, 127.0, 126.9, 126.4, 126.3, 124.8, 122.4, 121.6, 121.0, 98.3, 56.1, (nanaflate group not observed). <sup>19</sup>F NMR (377 MHz, CDCl<sub>3</sub>): -80.7 (t, *J*<sub>F-P</sub> = 11 Hz), -110.4 (m), -121.2 (m), -126.0 (m).

## Full screening results

Table S1. Additional conditions and ligands screened for the dynamic kinetic asymmetric alkylation.

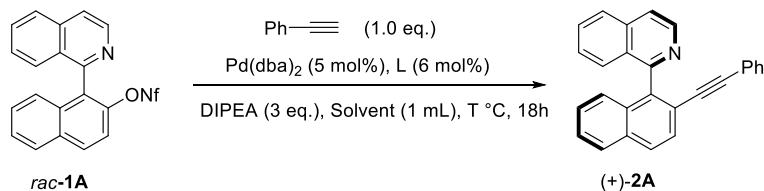

| Entry <sup>[a]</sup> | Ligand                                                  | Solvent/ T °C          | Variations in the reaction conditions | Conv. (%) <sup>[b]</sup> | ee (%) <sup>[c]</sup> |
|----------------------|---------------------------------------------------------|------------------------|---------------------------------------|--------------------------|-----------------------|
| 1                    | ( <i>R</i> )-BINAP <b>L1</b>                            | Dioxane, 70            |                                       | 62                       | 38                    |
| 2                    | ( <i>R</i> )-BINAP <b>L1</b>                            | Dioxane, 60            |                                       | 46                       | 70                    |
| 3                    | ( <i>R</i> )-BINAP <b>L1</b>                            | THF, 60                |                                       | 38                       | 68                    |
| 4                    | ( <i>R</i> )-BINAP <b>L1</b>                            | DME, 60                |                                       | 43                       | 66                    |
| 5                    | ( <i>R</i> )-BINAP <b>L1</b>                            | Toluene, 60            |                                       | 43                       | 64                    |
| 6                    | ( <i>R</i> )-BINAP <b>L1</b>                            | CH <sub>3</sub> CN, 60 |                                       | 10                       | 66                    |
| 7                    | ( <i>R</i> )-BINAP <b>L1</b>                            | DMF, 60                |                                       | 28                       | 65                    |
| 8                    | ( <i>R</i> )-BINAP <b>L1</b>                            | DMSO, 60               |                                       | 90                       | 68                    |
| 9                    | ( <i>R</i> )-Tol-BINAP <b>L2</b>                        | DMSO, 60               |                                       | 75                       | 72                    |
| 10                   | ( <i>R</i> )-DM-BINAP                                   | DMSO, 60               |                                       | 45                       | 60                    |
| 11                   | ( <i>R</i> )-H8-BINAP <b>L3</b>                         | DMSO, 60               |                                       | 77                       | 68                    |
| 12                   | ( <i>R</i> )-Tol-SDP <b>L4</b>                          | DMSO, 60               |                                       | 90                       | 18                    |
| 13                   | ( <i>R</i> )-MeO-BIPHEP <b>L5</b>                       | DMSO, 60               |                                       | 44                       | 68                    |
| 14                   | ( <i>R</i> )-DM-SEGPHOS <b>L6</b>                       | DMSO, 60               |                                       | 22                       | 82                    |
| 15                   | ( <i>R,R</i> )-Me-DUPHOS                                | DMSO, 60               |                                       | <5                       | -                     |
| 16                   | Josiphos SL-J002-1                                      | DMSO, 60               |                                       | 18                       | 80                    |
| 17                   | ( <i>S</i> )-QUINAP <b>L10</b>                          | DMSO, 60               |                                       | full                     | 86                    |
| 18                   | ( <i>S</i> )- <i>p</i> -MeQUINAP <sup>4</sup>           | DMSO, 60               |                                       | full                     | 86                    |
| 19                   | ( <i>S</i> )- <i>p</i> -FQUINAP <sup>4</sup> <b>L11</b> | DMSO, 60               |                                       | full                     | 90                    |
| 20                   | ( <i>S</i> )- <i>p</i> -OMeQUINAP <sup>4</sup>          | DMSO, 60               |                                       | full                     | 76                    |
| 21                   | ( <i>S</i> )- <i>p</i> -CyQUINAP                        | DMSO, 60               |                                       | full                     | 58                    |
| 22                   | ( <i>S</i> )- <i>t</i> BuQUINAP                         | DMSO, 60               |                                       | full                     | 0                     |
| 23                   | ( <i>S</i> )- <i>i</i> BuQUINAP                         | DMSO, 60               |                                       | full                     | 42                    |
| 24                   | ( <i>S</i> )-QNZ-QUINAP <sup>4</sup>                    | DMSO, 60               |                                       | full                     | 85                    |
| 25                   | ( <i>R</i> )-Ph-Garphos                                 | DMSO, 60               |                                       | 45                       | 74                    |
| 26                   | ( <i>S</i> )-2-Furyl-MeOBIPHEP                          | DMSO, 60               |                                       | 47                       | 8                     |



|    |                                            |             |                                       |      |      |
|----|--------------------------------------------|-------------|---------------------------------------|------|------|
| 27 | Phosphinohydrazone <b>L8</b>               | DMSO, 60    |                                       | full | 0    |
| 28 | SL-J001_1 (Taniaphos)                      | DMSO, 60    |                                       | 15   | 54   |
| 29 | SL-J003_1                                  | DMSO, 60    |                                       | 0    | -    |
| 30 | SL-J005_1 <b>L9</b>                        | DMSO, 60    |                                       | 73   | 90   |
| 31 | SL-M001_1                                  | DMSO, 60    |                                       | full | 22   |
| 32 | Taddol-P-NMe <sub>2</sub> <b>L7</b>        | DMSO, 60    |                                       | full | 30   |
| 33 | SL-W001-1                                  | DMSO, 60    |                                       | 85   | 12   |
| 34 | ( <i>S</i> )-QUINAP <b>L10</b>             | DMSO, 50    |                                       | full | 92   |
| 35 | ( <i>S</i> )- <i>p</i> -FQUINAP <b>L11</b> | DMSO, 50    |                                       | full | 92   |
| 36 | SL-J005_1 <b>L9</b>                        | DMSO, 50    |                                       | 57   | 88   |
| 37 | ( <i>S</i> )-QUINAP <b>L10</b>             | DMSO, 40    |                                       | full | 94   |
| 38 | ( <i>S</i> )- <i>p</i> -FQUINAP            | DMSO, 40    |                                       | full | 93.5 |
| 39 | ( <i>S</i> )-QUINAP                        | DMSO, 30    |                                       | >95  | 93   |
| 40 | ( <i>S</i> )-QUINAP                        | DMSO, 40    | [Pd-L] (5 mol %)                      | full | 94   |
| 41 | ( <i>S</i> )-QUINAP                        | THF, 40     | [Pd-L] (5 mol %)                      | 60   | 86   |
| 42 | ( <i>S</i> )-QUINAP                        | dioxane, 40 | [Pd-L] (5 mol %)                      | 73   | 95   |
| 43 | ( <i>S</i> )-QUINAP                        | toluene, 40 | [Pd-L] (5 mol %)                      | 50   | 94   |
| 44 | ( <i>S</i> )-QUINAP                        | DME, 40     | [Pd-L] (5 mol %)                      | 70   | 90   |
| 45 | ( <i>S</i> )-QUINAP                        | DMSO, 40    | [Pd-L] (5 mol %)<br>Et <sub>3</sub> N | full | 96   |
| 46 | ( <i>S</i> )-QUINAP                        | DMSO, 40    | <i>i</i> Pr <sub>2</sub> N            | full | 96   |
| 47 | ( <i>S</i> )-QUINAP                        | DMSO, 40    | pyrrolidine                           | full | 70   |
| 48 | ( <i>S</i> )-QUINAP                        | DMSO, 40    | DBU                                   | 0    | -    |
| 49 | ( <i>S</i> )-QUINAP                        | DMSO, 40    | DABCO                                 | 76   | 95   |
| 50 | ( <i>S</i> )-QUINAP                        | DMSO, 40    | Pd <sub>2</sub> (dba) <sub>3</sub>    | full | 96   |

<sup>a</sup>Conditions: 0.1 mmol of *rac*-**1A**, 0.2 mmol of phenylacetylene. <sup>b</sup>Determined by <sup>1</sup>H NMR spectroscopy.

<sup>c</sup>Determined by chiral HPLC analysis

## Reactivity studies using an oxidative addition intermediate $\text{OAI}^+(\text{OTf})$ .

An oxidative addition intermediate  $\text{OAI}^+(\text{OTf})$  has been prepared by reaction of 1-(isoquinolin-1-yl)naphthalene-2-yl triflate<sup>[3b]</sup> with **L10** and  $[\text{Pd}(\text{Cp})(\text{allyl})]$  in 88% yield after crystallization (Scheme S1). Reaction of this mixture with alkyne **2q** led to the expected product (*R*)-**3Aq** in 68% ee.

## Isolation of the OA intermediate $\text{OAI}^+(\text{OTf})$ .

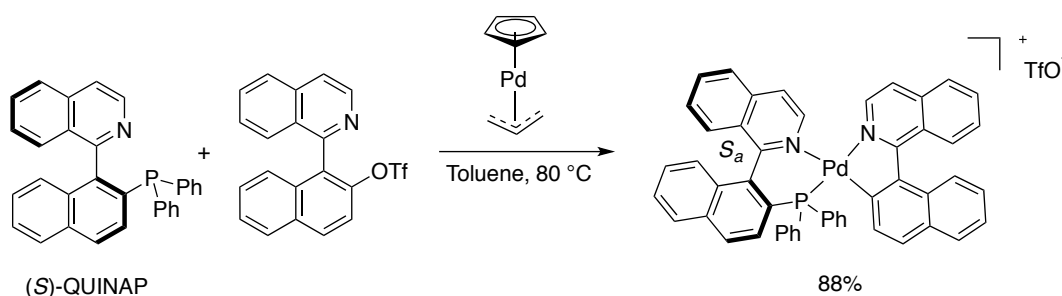

Scheme S1

A dried and deoxygenated Schlenk was charged with (*S*)-QUINAP **L10** (0.087 mmol, 38.4 mg) and 1-(isoquinolin-1-yl)naphthalene-2-yl triflate (0.087 mmol, 35.1 mg). After three cycles of vacuum- $\text{N}_2$ ,  $[\text{Pd}(\text{Cp})(\text{allyl})]$  (0.087 mmol, 18.4 mg) and dry and deoxygenated toluene (2.6 mL) were added. The reaction mixture was stirred overnight at 80 °C and a green precipitated was formed. The mixture was concentrated to dryness and the resulting residue (127.2 mg) was crystallized by slow diffusion of *n*-hexane into a solution of the reaction crude in THF to give  $\text{OAI}^+(\text{OTf})$  as pale yellow prisms suitable for X-Ray analysis (76 mg, 88%). M.P. = 170-172 °C (dec.).  $[\alpha]^{20}_{\text{D}} = -71.2^\circ$  (*c* 0.1,  $\text{CHCl}_3$ ).  $^1\text{H}$  NMR (400 MHz,  $\text{CD}_2\text{Cl}_2$ , 25 °C): A curved baseline was observed.  $\delta$  9.15 (d, 1H,  $J = 6.2$  Hz), 8.41 (d, 1H,  $J_{\text{H,H}} = 6.2$  Hz and  $J_{\text{H,P}} = 2.7$  Hz), 8.09 (d, 1H,  $J = 8.7$  Hz), 8.07 (d, 1H,  $J = 8.7$  Hz), 8.02-7.94 (m, 3H), 7.86-7.82 (m, 2H), 7.78-7.70 (m, 4H), 7.66-7.61 (m, 3H), 7.59-7.53 (m, 3H), 7.44-7.30 (m, 8H), 7.23 (t, 1H,  $J_{\text{H,H}} = J_{\text{H,P}} = 8.7$  Hz), 7.16 (d, 1H,  $J = 8.7$  Hz), 7.05-7.00 (m, 2H), 6.95-6.92 (m, 2H), 6.75 (dd, 1H,  $J_{\text{H,H}} = 8.3$  Hz and  $J_{\text{H,P}} = 6.3$  Hz).  $^{13}\text{C}$  NMR (100 MHz,  $\text{CD}_2\text{Cl}_2$ , 25 °C):  $\delta$  167.8 (d,  $J_{\text{C,P}} = 3$  Hz), 158.2 (d,  $J_{\text{C,P}} = 8$  Hz), 156.7 (d,  $J_{\text{C,P}} = 5$  Hz), 143.8 (d,  $J_{\text{C,P}} = 2$  Hz), 141.7, 141.3, 140.1 (d,  $J_{\text{C,P}} = 13$  Hz), 138.9, 137.2, 136.8 (d,  $J_{\text{C,P}} = 12$  Hz), 136.0 (br s), 134.7 (d,  $J_{\text{C,P}} = 2$  Hz), 134.3, 134.2, 133.6, 133.6, 133.5, 133.2, 133.1 (d,  $J_{\text{C,P}} = 9$  Hz), 132.7, 132.4 (d,  $J_{\text{C,P}} = 3$  Hz), 131.9, 131.8, 130.5, 130.2 (d,  $J_{\text{C,P}} = 6$  Hz), 130.0, 129.9, 129.2, 129.1, 129.1, 129.0, 128.9, 128.8, 128.7, 128.3, 128.2, 127.7, 127.6,

127.3 (d,  $J_{C,P} = 7$  Hz), 126.8 (d,  $J_{C,P} = 15$  Hz), 126.5, 126.4, 126.2, 125.8, 125.8, 125.0 (d,  $J_{C,P} = 50$  Hz), 123.3 (d,  $J_{C,P} = 54$  Hz), 122.0 (d,  $J_{C,P} = 3$  Hz), 121.6 (q,  $J_{C,F} = 319$  Hz).  $^{31}\text{P}$  NMR (161.7 MHz,  $\text{CD}_2\text{Cl}_2$ ):  $\delta +42.6$ .  $^{19}\text{F}$  NMR (377 MHz,  $\text{CD}_2\text{Cl}_2$ ):  $\delta -78.8$ . HRMS (ESI)  $m/z$  calcd for  $\text{C}_{50}\text{H}_{34}\text{N}_2\text{PPd}$  ( $\text{M}^+$ ) 799.1489, found 799.1468.

### Reaction of the $\text{OAI}^+(\text{OTf})$ with ethynyltrimethylsilane **2q** (Graph S1).

A Young's NMR tube was charged with a solution of  $\text{OAI}^+(\text{OTf})$  (4.9 mg, 5  $\mu\text{mol}$ ) in  $\text{DMSO-d}_6$  (0.5 mL) ( $^1\text{H}$  NMR spectra 1).  $\text{Et}_3\text{N}$  (10 eq) was added and the resulting mixture was warmed at 40  $^\circ\text{C}$  ( $^1\text{H}$  NMR spectra 2). Then alkyne **2q** (10 eq) was added and a series of  $^1\text{H}$  NMR spectra were recorded every 5 min at the same temperature ( $^1\text{H}$  NMR spectra 3-8, Graph S1).

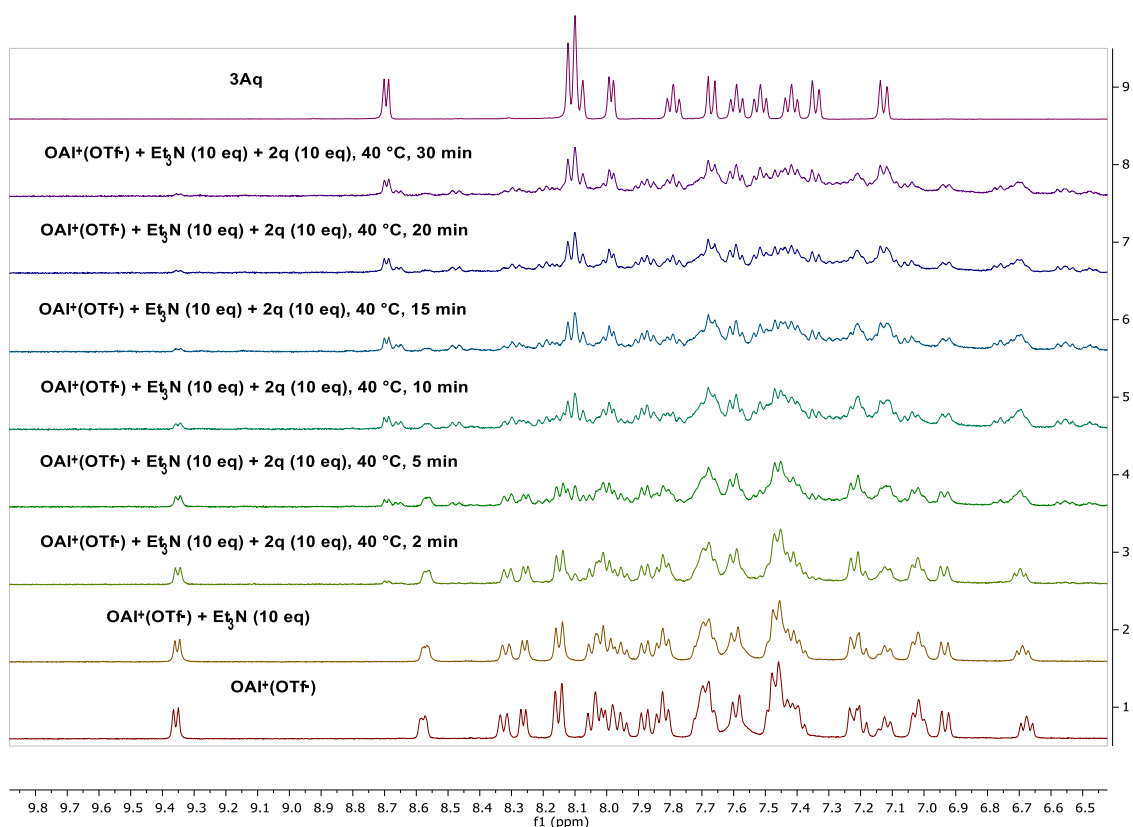

Graph S1

## Dynamic Kinetic Asymmetric alkynylation employing Quinap ligand L10.

*General procedure:* A flamed-dried Schlenk tube was charged with the corresponding nonaflate (**±**)-**1A**, **1C**, **1E** or triflate (**±**)-**1B**, **1D** (0.1 mmol), Pd(AcO)<sub>2</sub> (5 mol%, 1.1 mg) and (S)-QUINAP ligand **L10** (6 mol%, 2.7 mg). After three cycles of vacuum-argon, dry DMSO (1 mL) was added and the resulting mixture was stirred for 5 min at room temperature. Then Et<sub>3</sub>N (0.3 mmol, 42 μL) and the corresponding alkyne **2a-q** (0.2 mmol) were sequentially added and the resulting mixture was stirred at 40 °C for 18 hours. The reaction crude was allowed to reach room temperature, water (5 mL) was added and the resulting mixture was extracted with AcOEt (4 × 3 mL). The organic layer was dried over anhydrous Na<sub>2</sub>SO<sub>4</sub>, filtered, concentrated, and the residue was purified by column chromatography on silica gel using CH<sub>2</sub>Cl<sub>2</sub>/AcOEt mixtures.

*Note:* The racemic products were prepared by heating at 60 °C a mixture of the corresponding starting nonaflate (**±**)-**1A**, **1C**, **1E** or triflate (**±**)-**1B**, **1D** (0.1 mmol), Et<sub>3</sub>N (0.3 mmol) and alkyne (0.2 mmol) in DMSO (1 mL), using (**±**)-BINAP (12 mol%)/Pd(AcO)<sub>2</sub> (10 mol%) as the catalyst. For the synthesis of **3Af**, racemic (**±**)-QUINAP was used instead (**±**)-BINAP.

Yields, solvent used for chromatography, and characterization data for products **3Aa-3Eq**, **4A-C**, **5-7** are as follows:

### (R)-1-(2-(Phenylethynyl)naphthalen-1-yl)isoquinoline (**3Aa**, Table 2).

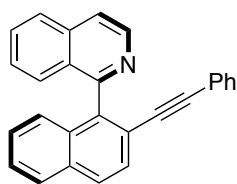

Following the general procedure using nonaflate **1A** and ethynylbenzene **2a**, purification by flash chromatography (CH<sub>2</sub>Cl<sub>2</sub>→25:1 CH<sub>2</sub>Cl<sub>2</sub>/EtOAc) afforded **3Aa** (35 mg, 99%) as a light yellow solid. M. p. 159-162 °C. [α]<sub>D</sub><sup>20</sup> +494.8 (c 0.49, CHCl<sub>3</sub>) for 97 % ee. <sup>1</sup>H NMR (400 MHz, CDCl<sub>3</sub>): δ 8.77 (d, J = 5.7 Hz, 1H), 7.98 (dd, J = 8.4, 2.4 Hz, 2H), 7.93 (d, J = 8.2 Hz, 1H), 7.82 (d, J = 5.7 Hz, 1H), 7.75 (d, J = 8.5 Hz, 1H), 7.70 (ddd, J = 8.2, 6.7, 1.2 Hz, 1H), 7.60 (d, J = 8.4 Hz, 1H), 7.49 (ddd, J = 8.1, 6.6, 1.3 Hz, 1H), 7.43 (ddd, J = 8.3, 6.8, 1.2 Hz, 1H), 7.35 (ddd, J = 8.1, 6.6, 1.3 Hz, 1H), 7.29 (br d, J = 8.3 Hz, 1H), 7.18-7.07 (m, 3H), 6.78-6.74 (m, 2H). <sup>13</sup>C NMR (100 MHz, CDCl<sub>3</sub>): δ 159.5, 142.5, 139.8, 136.2, 133.1, 132.4, 131.2, 130.2, 128.6, 128.3, 128.1, 128.0 (2C), 127.9, 127.5, 127.3, 126.9, 126.8, 126.6, 126.2, 122.9, 121.1, 120.3, 94.1, 88.9. HRMS (ESI) calcd. for C<sub>27</sub>H<sub>18</sub>N (M +

H<sup>+</sup>) 356.1434. Found 356.1430. HPLC (AD-H column, 85:15 *n*-Hex/*i*-PrOH, 30 °C, 1.0 mL/min): t<sub>R</sub> 12.07 min (major) and 14.46 min (minor).

**(R)-1-(2-((4-Methoxyphenyl)ethynyl)naphthalen-1-yl)isoquinoline (3Ab, Table 2).**

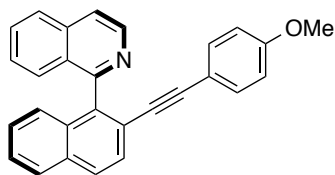

Following the general procedure using nonaflate **1A** and 1-ethynyl-4-methoxybenzene **2b**, purification by flash chromatography (CH<sub>2</sub>Cl<sub>2</sub>→20:1 CH<sub>2</sub>Cl<sub>2</sub>/EtOAc) afforded **3Ab** (38 mg, 99%) as a yellow amorphous solid. [α]<sup>20</sup><sub>D</sub> +405.2 (c 0.51, CHCl<sub>3</sub>) for 95 % ee. <sup>1</sup>H NMR (400 MHz, CDCl<sub>3</sub>): δ 8.77 (d, *J* = 5.7 Hz, 1H), 7.96 (d, *J* = 8.6 Hz, 2H), 7.92 (d, *J* = 8.2 Hz, 1H), 7.81 (d, *J* = 5.7 Hz, 1H), 7.72 (d, *J* = 8.6 Hz, 1H), 7.68 (d, *J* = 7.7 Hz, 1H), 7.60 (d, *J* = 8.4 Hz, 1H), 7.48 (t, *J* = 7.4 Hz, 1H), 7.42 (t, *J* = 7.7 Hz, 1H), 7.33 (t, *J* = 7.5 Hz, 1H), 7.27 (d, *J* = 9.5 Hz, 1H), 6.69 (d, *J* = 8.8 Hz, 2H), 6.63 (d, *J* = 8.8 Hz, 2H), 3.72 (s, 3H). <sup>13</sup>C NMR (100 MHz, CDCl<sub>3</sub>): δ 159.6, 159.4, 142.5, 139.4, 136.2, 132.9, 132.6, 132.4, 130.2, 128.5, 128.3, 128.0 (2C), 127.6, 127.3, 126.9, 126.7, 126.4, 126.1, 121.4, 120.2, 115.0, 113.6, 94.2, 87.7, 55.2. HRMS (ESI) calcd. for C<sub>28</sub>H<sub>20</sub>NO (M + H<sup>+</sup>) 386.1539. Found 386.1534. HPLC (AD-H column, 85:15 *n*-Hex/*i*-PrOH, 30 °C, 1 mL/min): t<sub>R</sub> 10.61 min (minor) and 16.08 min (major).

**(R)-4-((1-(Isoquinolin-1-yl)naphthalen-2-yl)ethynyl)-*N,N*-dimethylaniline (3Ac, Table 2).**

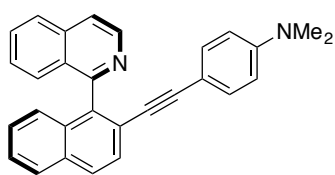

Following the general procedure using nonaflate **1A** and 4-ethynyl-*N,N*-dimethylaniline **2c**, purification by flash chromatography (CH<sub>2</sub>Cl<sub>2</sub>→10:1 CH<sub>2</sub>Cl<sub>2</sub>/EtOAc) afforded **3Ac** (38 mg, 95%) as a beige amorphous solid. [α]<sup>20</sup><sub>D</sub> +669.2 (c 0.05, CHCl<sub>3</sub>) for 88 % ee. <sup>1</sup>H NMR (400 MHz, CDCl<sub>3</sub>): δ 8.77 (dd, *J* = 5.9, 2.2 Hz, 1H), 7.95 (t, *J* = 7.6 Hz, 2H), 7.91 (d, *J* = 8.2 Hz, 1H), 7.80 (dd, *J* = 5.8, 2.0 Hz, 1H), 7.71 (d, *J* = 8.9 Hz, 1H), 7.67 (d, *J* = 7.9 Hz, 1H), 7.62 (d, *J* = 8.4 Hz, 1H), 7.49-7.38 (m, 2H), 7.32 (*br t*, *J* = 7.4 Hz, 1H), 7.27 (*br d*, *J* = 8.5 Hz, 1H), 6.63 (d, *J* = 7.3 Hz, 2H), 6.41 (d, *J* = 7.4 Hz, 2H), 2.88 (s, 6H). <sup>13</sup>C NMR (100 MHz, CDCl<sub>3</sub>): δ 159.8, 149.8, 142.5, 138.8, 136.2, 132.7, 132.5, 132.3, 130.1, 128.4, 128.0 (2C), 127.7, 127.2, 126.7 (2C), 126.1, 126.0, 122.0, 120.1, 111.4, 109.7, 95.7, 87.1, 40.1. HRMS (ESI) calcd. for C<sub>29</sub>H<sub>23</sub>N<sub>2</sub> (M + H<sup>+</sup>) 399.1856. Found 399.1851. HPLC (AD-H column, 85:15 *n*-Hex/*i*-PrOH, 30 °C, 1 mL/min): t<sub>R</sub> 9.06 min (minor) and 15.57 min (major).

**(R)-1-(2-((4-Fluorophenyl)ethynyl)naphthalen-1-yl)isoquinoline (3Ad, Table 2).**

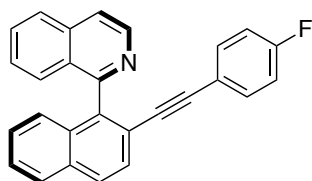

Following the general procedure using nonaflate **1A** and 1-ethynyl-4-fluorobenzene **2d**, purification by flash chromatography ( $\text{CH}_2\text{Cl}_2 \rightarrow 5:1 \text{ CH}_2\text{Cl}_2/\text{EtOAc}$ ) afforded **3Ad** (37 mg, 98%) as a clear viscous oil.  $[\alpha]^{20}_{\text{D}} +214.5$  ( $c$  0.5,  $\text{CHCl}_3$ ) for 95 % ee.  $^1\text{H NMR}$  (400 MHz,  $\text{CDCl}_3$ ):  $\delta$  8.77 (d,  $J = 5.7$  Hz, 1H), 7.97 (d,  $J = 8.6$  Hz, 2H) 7.93 (d,  $J = 8.2$  Hz, 1H), 7.81 (*br* d,  $J = 5.7$  Hz, 1H), 7.76-7.65 (m, 2H), 7.58 (*br* dd,  $J = 8.5, 1.1$  Hz, 1H), 7.50 (ddd,  $J = 8.1, 6.7, 1.3$  Hz, 1H), 7.43 (ddd,  $J = 8.3, 6.8, 1.2$  Hz, 1H), 7.35 (ddd,  $J = 8.1, 6.7, 1.3$  Hz, 1H), 7.28 (*br* d,  $J = 8.4$  Hz, 1H), 6.83-6.77 (m, 2H), 6.74-6.69 (m, 2H).  $^{13}\text{C NMR}$  (100 MHz,  $\text{CDCl}_3$ ):  $\delta$  162.2 (d,  $^1J_{\text{CF}} = 249.4$  Hz), 159.4, 142.6, 139.8, 136.2, 133.1, 133.0 (d,  $^3J_{\text{CF}} = 8.4$  Hz), 132.4, 130.3, 128.6, 128.3, 128.1, 127.9, 127.5, 127.3, 127.0, 126.8, 126.6, 126.2, 120.9, 120.3, 119.0 (d,  $^4J_{\text{CF}} = 3.3$  Hz), 115.3 (d,  $^2J_{\text{CF}} = 22.2$  Hz), 93.0, 88.6 (d,  $^5J_{\text{CF}} = 1.3$  Hz).  $^{19}\text{F NMR}$  (377 MHz,  $\text{CDCl}_3$ )  $\delta$  -111.0. HRMS (ESI) calcd. for  $\text{C}_{27}\text{H}_{17}\text{FN}$  ( $\text{M} + \text{H}^+$ ) 374.1340. Found 374.1335. HPLC (AD-H column, 80:20 *n*-Hex/*i*-PrOH, 30 °C, 1 mL/min):  $t_{\text{R}}$  7.08 min (minor) and 9.53 min (major).

**(R)-1-(2-((4-Bromophenyl)ethynyl)naphthalen-1-yl)isoquinoline (3Ae, Table 2).**

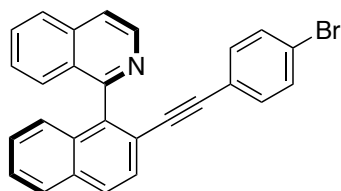

Following the general procedure using nonaflate **1A** and 1-bromo-4-ethynylbenzene **2e**, purification by flash chromatography ( $\text{CH}_2\text{Cl}_2 \rightarrow 5:1 \text{ CH}_2\text{Cl}_2/\text{EtOAc}$ ) afforded **3Ae** (40 mg, 92%) as a light yellow amorphous solid.  $[\alpha]^{20}_{\text{D}} +146.7$  ( $c$  0.26,  $\text{CHCl}_3$ ) for 94 % ee.  $^1\text{H NMR}$  (400 MHz,  $\text{CDCl}_3$ ):  $\delta$  8.77 (d,  $J = 5.7$  Hz, 1H), 7.98 (dd,  $J = 8.4, 3.1$  Hz, 2H), 7.93 (d,  $J = 8.2$  Hz, 1H), 7.82 (d,  $J = 5.7$  Hz, 1H), 7.75-7.67 (m, 2H), 7.58 (dd,  $J = 8.5, 1.1$  Hz, 1H), 7.50 (ddd,  $J = 8.1, 6.7, 1.3$  Hz, 1H), 7.43 (ddd,  $J = 8.3, 6.8, 1.2$  Hz, 1H), 7.35 (ddd,  $J = 8.1, 6.7, 1.3$  Hz, 1H), 7.29 (d,  $J = 8.3$  Hz, 1H), 7.25-7.21 (m, 2H), 6.62-6.54 (m, 2H).  $^{13}\text{C NMR}$  (100 MHz,  $\text{CDCl}_3$ ):  $\delta$  159.3, 142.4, 136.2, 133.2, 132.5, 132.3, 131.2, 130.3, 128.7, 128.3, 128.1, 127.9, 127.5, 127.4, 127.0, 126.8, 126.7, 126.2, 122.2, 121.8, 120.7, 120.3, 93.0, 90.0. HRMS (ESI) calcd. for  $\text{C}_{27}\text{H}_{17}\text{BrN}$  ( $\text{M} + \text{H}^+$ ) 434.0539. Found 434.0533. HPLC (AD-H column, 85:15 *n*-Hex/*i*-PrOH, 30 °C, 1 mL/min):  $t_{\text{R}}$  8.98 min (minor) and 14.77 min (major).

**(R)-4-((1-(Isoquinolin-1-yl)naphthalen-2-yl)ethynyl)benzonitrile (3Af, Table 2).**

Following the general procedure using nonaflate **1A** and 4-ethynylbenzonitrile **2f**,

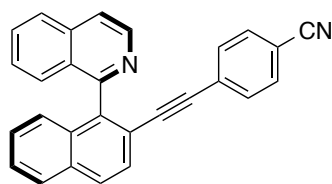

purification by flash chromatography (CH<sub>2</sub>Cl<sub>2</sub>→5:1 CH<sub>2</sub>Cl<sub>2</sub>/EtOAc) afforded **3Af** (35 mg, 92%) as a yellow foam.

[α]<sup>20</sup><sub>D</sub> +192.4 (c 0.20, CHCl<sub>3</sub>) for 75 % ee. <sup>1</sup>H NMR (400 MHz, CDCl<sub>3</sub>): δ 8.77 (d, *J* = 5.7 Hz, 1H), 8.0 (d, *J* = 8.5 Hz, 1H), 7.99 (br d, *J* = 8.3 Hz, 1H), 7.95 (d, *J* = 8.2 Hz, 1H), 7.83 (dd, *J* = 5.7, 0.9 Hz, 1H), 7.75-7.69 (m, 2H), 7.57-7.50 (m, 2H), 7.43 (ddd, *J* = 8.2, 6.8, 1.1 Hz, 1H), 7.40-7.34 (m, 3H), 7.29 (br d, *J* = 8.7 Hz, 1H), 6.81-6.77 (m, 2H). <sup>13</sup>C NMR (100 MHz, CDCl<sub>3</sub>): δ 159.1, 142.5, 140.7, 136.2, 133.5, 132.3, 131.7, 131.5, 130.4, 128.8, 128.2, 128.1, 127.8, 127.5, 127.3, 127.2, 127.1, 126.9, 126.3, 120.4, 119.9, 118.4, 111.1, 93.3, 92.2. HRMS (ESI) calcd. for C<sub>28</sub>H<sub>17</sub>N<sub>2</sub> (M + H<sup>+</sup>) 381.1386. Found 381.1382. HPLC (AD-H column, 80:20 *n*-Hex/*i*-PrOH, 30 °C, 1 mL/min): t<sub>R</sub> 10.2 min (minor) and 19.5 min (major).

**(R)-1-(2-([1,1'-Biphenyl]-4-ylethynyl)naphthalen-1-yl)isoquinoline (3Ag, Table 2).**

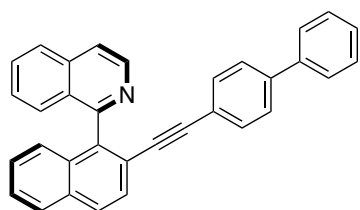

Following the general procedure using nonaflate **1A** and 4-ethynyl-1,1'-biphenyl **2g**, purification by flash chromatography (CH<sub>2</sub>Cl<sub>2</sub>→5:1 CH<sub>2</sub>Cl<sub>2</sub>/EtOAc) afforded **3Ag** (38 mg, 88%) as a light brown foam. [α]<sup>20</sup><sub>D</sub> +316.1.0 (c 0.51,

CHCl<sub>3</sub>) for 91 % ee. <sup>1</sup>H NMR (400 MHz, CDCl<sub>3</sub>): δ 8.78 (d, *J* = 5.7 Hz, 1H), 7.99 (d, *J* = 8.4 Hz, 2H), 7.94 (br d, *J* = 8.2 Hz, 1H), 7.83 (dd, *J* = 5.8, 0.9 Hz, 1H), 7.76 (d, *J* = 8.5 Hz, 1H), 7.71 (ddd, *J* = 8.2, 6.8, 1.2 Hz, 1H), 7.61 (br dd, *J* = 8.5, 1.0 Hz, 1H), 7.52-7.47 (m, 3H), 7.47-7.36 (m, 3H), 7.36-7.31 (m, 4H), 7.29 (dd, *J* = 8.3, 1.2 Hz, 1H), 6.83-6.80 (m, 2H). <sup>13</sup>C NMR (100 MHz, CDCl<sub>3</sub>) δ 159.5, 142.6, 140.7, 140.2, 139.9, 136.3, 133.1, 132.4, 131.6, 130.3, 128.8, 128.6, 128.4, 128.1, 128.0, 127.6, 127.5, 127.4, 126.9 (2C), 126.8, 126.6 (2C), 126.2, 121.8, 121.1, 120.3, 94.0, 89.6. HRMS (ESI) calcd. for C<sub>33</sub>H<sub>22</sub>N (M + H<sup>+</sup>) 432.1747. Found 432.1742. HPLC (AD-H column, 80:20 *n*-Hex/*i*-PrOH, 30 °C, 1 mL/min): t<sub>R</sub> 7.58 min (minor) and 12.05 min (major).

**(R)-1-(2-((2,5-Dimethylphenyl)ethynyl)naphthalen-1-yl)isoquinoline (3Ah, Table 2).**

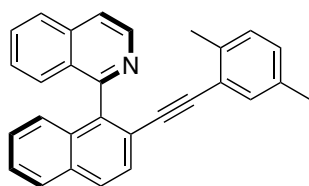

Following the general procedure using nonaflate **1A** and 2-ethynyl-1,4-dimethylbenzene **2h**, purification by flash chromatography (CH<sub>2</sub>Cl<sub>2</sub>→5:1 CH<sub>2</sub>Cl<sub>2</sub>/EtOAc) afforded **3Ah** (36 mg, 94%) as a light yellow amorphous solid.  $[\alpha]^{20}_{\text{D}} +303.2$  (*c* 0.5, CHCl<sub>3</sub>) for 92 % ee. <sup>1</sup>H NMR (400MHz, CDCl<sub>3</sub>): δ 8.76 (d, *J* = 5.7 Hz, 1H), 7.98 (*br d*, *J* = 8.5 Hz, 1H), 7.94 (*br t*, *J* = 7.7 Hz, 2H), 7.81-7.75 (m, 2H), 7.68 (ddd, *J* = 8.2, 6.8, 1.2 Hz, 1H), 7.59 (dd, *J* = 8.5, 1.1 Hz, 1H), 7.48 (ddd, *J* = 8.1, 6.8, 1.2 Hz, 1H), 7.42 (ddd, *J* = 8.3, 6.8, 1.2 Hz, 1H), 7.32 (ddd, *J* = 8.2, 6.8, 1.3 Hz, 1H), 7.20 (*br d*, *J* = 8.4 Hz, 1H), 6.88 (dd, *J* = 7.8, 1.8 Hz, 1H), 6.84 (*br d*, *J* = 7.8 Hz, 1H), 6.77 (*br s*, 1H), 2.17 (s, 3H), 1.53 (s, 3H). <sup>13</sup>C NMR (100 MHz, CDCl<sub>3</sub>): δ 159.6, 142.7, 139.2, 136.7, 136.4, 134.6, 133.0, 132.5, 132.2, 130.2, 129.0, 128.9, 128.5 (2C), 128.4, 128.0, 127.5, 127.4, 126.9, 126.7, 126.5, 126.1, 122.5, 121.3, 120.3, 93.0, 92.3, 20.6, 19.2. HRMS (ESI) calcd. for C<sub>29</sub>H<sub>22</sub>N (M + H<sup>+</sup>) 384.1747. Found 384.1743. HPLC (AD-H column, 80:20 *n*-Hex/*i*-PrOH, 30 °C, 1 mL/min): *t*<sub>R</sub> 8.23 min (major) and 18.64 min (minor).

**(R)-1-(2-(Naphthalen-1-ylethynyl)naphthalen-1-yl)isoquinoline (3Ai, Table 2).**

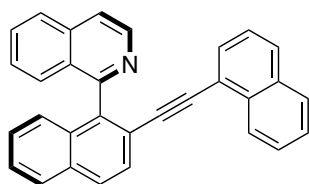

Following the general procedure using nonaflate **1A** and 1-ethynynaphthalene **2i**, purification by flash chromatography (CH<sub>2</sub>Cl<sub>2</sub>→5:1 CH<sub>2</sub>Cl<sub>2</sub>/EtOAc) afforded **3Ai** (40 mg, 99%) as a yellow foam.  $[\alpha]^{20}_{\text{D}} +371.0$  (*c* 0.5, CHCl<sub>3</sub>) for 94 % ee. <sup>1</sup>H NMR (400 MHz, CDCl<sub>3</sub>): δ 8.82 (d, *J* = 5.7 Hz, 1H), 8.02 (t, *J* = 8.2 Hz, 2H), 7.96 (d, *J* = 8.2 Hz, 1H), 7.90-7.85 (m, 2H), 7.73-7.63 (m, 4H), 7.51 (ddd, *J* = 8.1, 6.7, 1.2 Hz, 1H), 7.44 (ddd, *J* = 8.3, 6.8, 1.2 Hz, 1H), 7.41-7.27 (m, 4H), 7.25 (*br d*, *J* = 9.3 Hz, 1H), 7.16 (ddd, *J* = 8.2, 6.8, 1.3 Hz, 1H), 6.89 (d, *J* = 8.3 Hz, 1H). <sup>13</sup>C NMR (100 MHz, CDCl<sub>3</sub>): δ 159.6, 142.8, 139.5, 136.4, 133.1, 132.8, 132.5, 130.4, 130.2, 128.7, 128.5 (3C), 128.1, 127.9, 127.6, 127.5, 127.0, 126.8, 126.6, 126.2 (2C), 126.1, 125.8, 125.0, 121.2, 120.6, 120.4, 93.6, 92.0. HRMS (ESI) calcd. for C<sub>31</sub>H<sub>20</sub>N (M + H<sup>+</sup>) 406.1590. Found 406.1586. HPLC (AD-H column, 80:20 *n*-Hex/*i*-PrOH, 30 °C, 1 mL/min): *t*<sub>R</sub> 12.07 min (major) and 18.17 min (minor).



**(R)-1-(2-(Naphthalen-2-ylethynyl)naphthalen-1-yl)isoquinoline (3Aj, Table 2).**

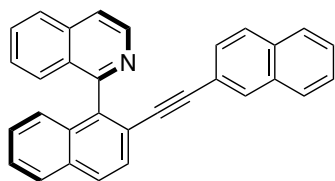

Following the general procedure using nonaflate **1A** and 2-ethynylnaphthalene **2j**, purification by flash chromatography ( $\text{CH}_2\text{Cl}_2 \rightarrow 5:1 \text{ CH}_2\text{Cl}_2/\text{EtOAc}$ ) afforded **3Aj** (40 mg, 99%) as a light yellow foam.  $[\alpha]^{20}_{\text{D}} +207.6$  ( $c$  0.5,  $\text{CHCl}_3$ ) for 94 % ee.  $^1\text{H}$  NMR (400 MHz,  $\text{CDCl}_3$ ):  $\delta$  8.80 (d,  $J = 5.7$  Hz, 1H), 8.01 (d,  $J = 8.4$  Hz, 1H), 8.00 (d,  $J = 8.5$  Hz, 1H), 7.95 (*br* d,  $J = 8.2$ , 1H), 7.85 (dd,  $J = 5.8, 0.9$  Hz, 1H), 7.78 (d,  $J = 8.5$  Hz, 1H), 7.75-7.67 (m, 2H), 7.65 (*br* dd,  $J = 8.5, 1.0$  Hz, 1H), 7.62-7.58 (m, 1H), 7.56 (d,  $J = 8.5$  Hz, 1H), 7.51 (ddd,  $J = 8.2, 6.5, 1.5$  Hz, 1H), 7.48-7.39 (m, 3H), 7.39-7.34 (m, 1H), 7.32 (*br* d,  $J = 7.8$  Hz, 1H), 7.23 (*br* s, 1H), 6.76 (dd,  $J = 8.5, 1.6$  Hz, 1H).  $^{13}\text{C}$  NMR (100 MHz,  $\text{CDCl}_3$ ):  $\delta$  159.5, 142.6, 140.0, 136.3, 133.2, 132.7, 132.6, 132.4, 131.1, 130.3, 128.6, 128.4, 128.1, 128.0, 127.9, 127.6 (3C), 127.5, 127.4, 127.0, 126.8, 126.6, 126.5, 126.3, 126.2, 121.1, 120.3, 120.2, 94.6, 89.4. HRMS (ESI) calcd. for  $\text{C}_{31}\text{H}_{20}\text{N}$  ( $\text{M} + \text{H}^+$ ) 406.1590. Found 406.1586. HPLC (AD-H column, 80:20 *n*-Hex/*i*-PrOH, 30 °C, 1 mL/min):  $t_{\text{R}}$  8.75 min (minor) and 12.53 min (major).

**(R)-1-(2-((4-Methoxynaphthalen-1-yl)ethynyl)naphthalen-1-yl)isoquinoline (3Ak, Table 2).**

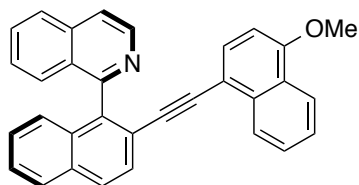

Following the general procedure using nonaflate **1A** and 1-ethynyl-4-methoxynaphthalene **2k**, purification by flash chromatography ( $\text{CH}_2\text{Cl}_2 \rightarrow \text{CH}_2\text{Cl}_2/\text{EtOAc}$  20:1) afforded **3Ak** (41 mg, 94%) as a beige solid. X-ray quality crystals (colorless prisms) were obtained by slow evaporation of a solution of **3Ak** in  $\text{CH}_2\text{Cl}_2$ . M. p. 220-222 °C (decomposition).  $[\alpha]^{20}_{\text{D}} +387.3$  ( $c$  0.52,  $\text{CHCl}_3$ ) for 89 % ee.  $^1\text{H}$  NMR (400 MHz,  $\text{CDCl}_3$ ): 8.83 (d,  $J = 5.7$  Hz, 1H), 8.13 (d,  $J = 8.3$ , 1H), 8.02 (d,  $J = 3.9$  Hz, 1H), 8.00 (d,  $J = 3.7$  Hz, 1H), 7.95 (d,  $J = 8.2$  Hz, 1H), 7.89-7.85 (m, 2H), 7.73-7.65 (m, 2H), 7.50 (ddd,  $J = 8.1, 6.7, 1.2$  Hz, 1H), 7.44 (ddd,  $J = 8.2, 6.8, 1.2$  Hz, 1H), 7.41-7.32 (m, 2H), 7.29-7.22 (m, 2H), 7.18 (ddd,  $J = 8.2, 6.8, 1.3$  Hz, 1H), 6.82 (d,  $J = 8.3$  Hz, 1H), 6.62 (d,  $J = 8.1$  Hz, 1H), 3.92 (s, 3H).  $^{13}\text{C}$  NMR (100 MHz,  $\text{CDCl}_3$ )  $\delta$  159.8, 155.8, 142.8, 139.0, 136.4, 133.7, 132.9, 132.5, 130.9, 130.4, 128.6, 128.5, 128.0, 127.5 (2C), 126.9, 126.8, 126.7, 126.4, 126.1, 125.5, 125.3, 124.9, 121.9, 121.6, 120.3, 112.8, 103.4, 99.9, 92.5, 92.1, 55.5. HRMS (ESI)

calcd. for C<sub>32</sub>H<sub>22</sub>NO (M + H<sup>+</sup>) 436.1696. Found 436.1693. HPLC (AD-H column, 85:15 *n*-Hex/*i*-PrOH, 30 °C, 1 mL/min): t<sub>R</sub> 18.65 min (major) and 21.13 min (minor).

**(R)-1-(2-(Cyclohex-1-en-1-ylethynyl)naphthalen-1-yl) (3Al, Table 2).**

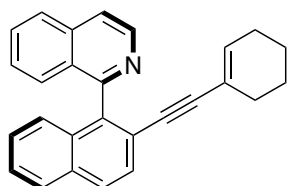

Following the general procedure using nonaflate **1A** and 1-ethynylcyclohex-1-ene **2I**, purification by flash chromatography (CH<sub>2</sub>Cl<sub>2</sub>→25:1 CH<sub>2</sub>Cl<sub>2</sub>/EtOAc) afforded **3Al** (28 mg, 78%) as light yellow amorphous solid. [α]<sub>D</sub><sup>20</sup> +229.8 (*c* 0.51, CHCl<sub>3</sub>) for 98 % ee.

<sup>1</sup>H NMR (400 MHz, CDCl<sub>3</sub>): δ 8.73 (d, *J* = 5.7 Hz, 1H), 7.97-7.86 (m, 3H), 7.77 (d, *J* = 5.8 Hz, 1H), 7.68 (ddd, *J* = 8.2, 6.8, 1.2 Hz, 1H), 7.63 (d, *J* = 8.6 Hz, 1H), 7.54 (d, *J* = 8.5 Hz, 1H), 7.48-7.38 (m, 2H), 7.31 (ddd, *J* = 8.2, 6.7, 1.2 Hz, 1H), 7.23 (d, *J* = 8.5 Hz, 1H), 5.55 (*br t*, *J* = 3.5 Hz, 1H), 1.96-1.85 (m, 2H), 1.46-1.33 (m, 6H). <sup>13</sup>C NMR (100 MHz, CDCl<sub>3</sub>): δ 159.6, 142.5, 139.3, 136.2, 134.8, 132.8, 132.4, 130.1, 128.4, 128.3, 128.1, 128.0, 127.6, 127.2, 126.8, 126.7, 126.2, 126.1, 121.6, 120.4, 120.1, 96.1, 86.4, 28.3, 25.5, 22.0, 21.3. HRMS (ESI) calcd. for C<sub>27</sub>H<sub>22</sub>N (M + H<sup>+</sup>) 360.1747. Found 360.1742. HPLC (AD-H column, 85:15 *n*-Hex/*i*-PrOH, 30 °C, 1 mL/min): t<sub>R</sub> 9.28 min (minor) and 10.55 min (major).

**(R)-1-(2-(Cyclopentylethynyl)naphthalen-1-yl)isoquinoline (3Am, Table 2).**

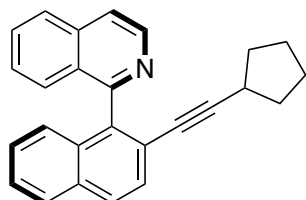

Following the general procedure using nonaflate **1A** and ethynylcyclopentane **3m**, purification by flash chromatography (CH<sub>2</sub>Cl<sub>2</sub>→25:1 CH<sub>2</sub>Cl<sub>2</sub>/EtOAc) afforded **3Am** (31 mg, 89%) as light yellow amorphous solid. [α]<sub>D</sub><sup>20</sup> +110.0 (*c* 0.26, CHCl<sub>3</sub>) for 96 % ee.

<sup>1</sup>H NMR (400 MHz, CDCl<sub>3</sub>): δ 8.73 (d, *J* = 5.7 Hz, 1H), 7.95-7.86 (m, 3H), 7.76 (d, *J* = 5.7 Hz, 1H), 7.68 (ddd, *J* = 8.2, 6.8, 1.3 Hz, 1H), 7.59 (d, *J* = 8.5 Hz, 1H), 7.53 (dd, *J* = 8.5, 1.0 Hz, 1H), 7.47-7.38 (m, 2H), 7.30 (ddd, *J* = 8.2, 6.7, 1.3 Hz, 1H), 7.22 (dd, *J* = 8.5, 1.1 Hz, 1H), 2.44-2.35 (m, 1H), 1.50-1.38 (m, 2H), 1.30-1.11 (m, 4H), 0.98-0.83 (m, 2H). <sup>13</sup>C NMR (100 MHz, CDCl<sub>3</sub>): δ 159.9, 142.3, 139.3, 136.2, 132.7, 132.4, 130.1, 128.4, 128.3, 128.2, 127.9, 127.6, 127.1, 126.7, 126.6, 126.1, 125.9, 121.9, 120.0, 100.0, 79.4, 33.2, 33.2, 30.3, 24.4. HRMS (ESI) calcd. for C<sub>26</sub>H<sub>22</sub>N (M + H<sup>+</sup>) 348.1747. Found 348.1742. HPLC (AD-H column, 85:15 *n*-Hex/*i*-PrOH, 30 °C, 1 mL/min): t<sub>R</sub> 6.17 min (minor) and 7.01 min (major).

**(R)-1-(2-(Oct-1-yn-1-yl)naphthalen-1-yl)isoquinoline (3An, Table 2).**

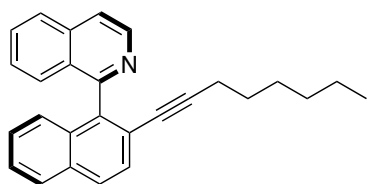

Following the general procedure using nonaflate **1A** and oct-1-yne **2n**, purification by flash chromatography ( $\text{CH}_2\text{Cl}_2 \rightarrow 25:1 \text{ CH}_2\text{Cl}_2/\text{EtOAc}$ ) afforded **3An** (36 mg, 99%) as a yellow amorphous solid.  $[\alpha]^{20}_{\text{D}} +1253.3$  ( $c$  0.51,  $\text{CHCl}_3$ ) for 96 % ee.  $^1\text{H NMR}$  (400 MHz,  $\text{CDCl}_3$ )  $\delta$  8.82 (d,  $J = 5.7$  Hz, 1H), 8.05-7.92 (m, 3H), 7.84 (d,  $J = 5.7$  Hz, 1H), 7.76 (t,  $J = 7.6$  Hz, 1H), 7.70 (d,  $J = 8.5$  Hz, 1H), 7.60 (d,  $J = 8.5$  Hz, 1H), 7.57-7.45 (m, 2H), 7.41-7.34 (m, 1H), 7.25 (d,  $J = 8.5$  Hz, 1H), 2.05 (t,  $J = 6.8$  Hz, 2H), 1.22 (q,  $J = 7.4$  Hz, 2H), 1.11-0.96 (m, 4H), 0.95-0.84 (m, 5H).  $^{13}\text{C NMR}$  (100 MHz,  $\text{CDCl}_3$ )  $\delta$  159.8, 142.5, 139.3, 136.2, 132.7, 132.4, 130.0, 128.5, 128.3, 127.9, 127.5, 127.1, 126.7, 126.1, 126.0, 121.8, 120.1, 95.4, 79.9, 31.2, 28.1, 27.9, 22.3, 19.1, 14.1. HRMS (ESI) calcd. for  $\text{C}_{27}\text{H}_{26}\text{N}$  ( $\text{M} + \text{H}^+$ ) 364.2060. Found 364.2053. HPLC (AD-H column, 85:15 *n*-Hex/*i*-PrOH, 30 °C, 1 mL/min):  $t_{\text{R}}$  5.40 min (minor) and 6.48 min (major).

**(R)-4-(1-(Isoquinolin-1-yl)naphthalen-2-yl)but-3-yn-1-ol (3Ao, Table 2).**

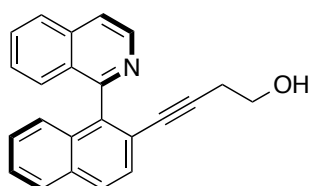

Following the general procedure using nonaflate **1A** and but-3-yn-1-ol **2o**, purification by flash chromatography ( $\text{CH}_2\text{Cl}_2 \rightarrow 10:1 \text{ CH}_2\text{Cl}_2/\text{EtOAc}$ ) afforded **3Ao** (32 mg, 99%) as a white foam.  $[\alpha]^{20}_{\text{D}} +84.2$  ( $c$  0.27,  $\text{CHCl}_3$ ) for 96 % ee.  $^1\text{H NMR}$  (400 MHz,  $\text{CDCl}_3$ ):  $\delta$  8.74 (d,  $J = 5.7$  Hz, 1H), 7.96 (dt,  $J = 8.3, 1.0$  Hz, 1H), 7.94-7.88 (m, 2H), 7.81 (dd,  $J = 5.8, 0.9$  Hz, 1H), 7.71 (ddd,  $J = 8.2, 6.7, 1.4$  Hz, 1H), 7.62 (d,  $J = 8.5$  Hz, 1H), 7.51-7.40 (m, 3H), 7.30 (ddd,  $J = 8.3, 6.8, 1.3$  Hz, 1H), 7.15 (*br* dd,  $J = 8.6, 1.0$  Hz, 1H), 3.10 (t,  $J = 5.9$  Hz, 2H), 2.20 (q,  $J = 6.2$  Hz, 2H).  $^{13}\text{C NMR}$  (100 MHz,  $\text{CDCl}_3$ ):  $\delta$  159.6, 142.3, 139.3, 136.2, 132.8, 132.2, 130.5, 128.6, 128.2, 128.1, 128.0, 127.5, 127.3, 127.0, 126.9, 126.4, 125.9, 121.1, 120.5, 91.6, 81.7, 60.6, 23.7. HRMS (ESI) calcd. for  $\text{C}_{23}\text{H}_{18}\text{NO}$  ( $\text{M} + \text{H}^+$ ) 324.1383. Found 324.1380. HPLC (AD-H column, 85:15 *n*-Hex/*i*-PrOH, 30 °C, 1 mL/min):  $t_{\text{R}}$  9.42 min (minor) and 10.42 min (major).

**(*R,R*) and (*R,S*)-1-(1-(Isoquinolin-1-yl)naphthalen-2-yl)pent-1-yn-3-ol (3Ap, Table 2).**

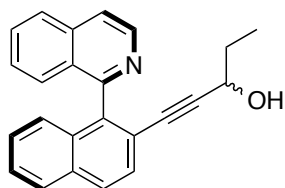

Following the general procedure using nonaflate **1A** and racemic pent-1-yn-3-ol **2p**, purification by flash chromatography (CH<sub>2</sub>Cl<sub>2</sub>→20:1 CH<sub>2</sub>Cl<sub>2</sub>/EtOAc) afforded **3Ap** (33 mg, 99%) as a 1:1 separable diastereomeric mixture and as a yellow foam.

HRMS (ESI) calcd. for C<sub>24</sub>H<sub>20</sub>NO (M + H<sup>+</sup>) 338.1539. Found 338.1535.

**Diastereomer 1** [ $\alpha$ ]<sub>D</sub><sup>20</sup> +130.9 (*c* 0.16, CHCl<sub>3</sub>) for 97 % ee. <sup>1</sup>H NMR (400 MHz, CDCl<sub>3</sub>):  $\delta$  8.73 (d, *J* = 5.7 Hz, 1H), 7.98-7.88 (m, 3H), 7.78 (d, *J* = 5.8 Hz, 1H), 7.69 (d, *J* = 7.6 Hz, 1H), 7.63 (d, *J* = 8.5 Hz, 1H), 7.53-7.40 (m, 3H), 7.32 (t, *J* = 7.6 Hz, 1H), 7.20 (d, *J* = 8.5 Hz, 1H), 4.06 (dd, *J* = 7.0, 5.7 Hz, 1H), 1.28-1.02 (m, 3H), 0.40 (t, *J* = 7.4 Hz, 3H). <sup>13</sup>C NMR (100 MHz, CDCl<sub>3</sub>):  $\delta$  159.2, 142.2, 139.6, 136.3, 133.1, 132.3, 130.4, 128.7, 128.2, 128.1 (2C), 127.5, 127.4, 127.0, 126.8, 126.6, 126.1, 120.5, 120.4, 94.7, 84.0, 63.7, 30.3, 8.6. HPLC (AD-H column, 85:15 *n*-Hex/*i*-PrOH, 30 °C, 1 mL/min): *t*<sub>R</sub> 10.93 min (minor) and 11.89 min (major).

**Diastereomer 2** [ $\alpha$ ]<sub>D</sub><sup>20</sup> +105.0 (*c* 0.25, CHCl<sub>3</sub>) for 97 % ee. <sup>1</sup>H NMR (400 MHz, CDCl<sub>3</sub>):  $\delta$  8.73 (d, *J* = 5.7 Hz, 1H), 7.99-7.88 (m, 3H), 7.79 (d, *J* = 5.8 Hz, 1H), 7.70 (ddd, *J* = 8.1, 6.7, 1.3 Hz, 1H), 7.63 (d, *J* = 8.5 Hz, 1H), 7.52-7.45 (m, 2H), 7.45-7.39 (m, 1H), 7.32 (t, *J* = 7.6 Hz, 2H), 7.19 (d, *J* = 8.5 Hz, 1H), 4.03 (t, *J* = 6.4 Hz, 1H), 1.35-1.05 (m, 3H), 0.40 (t, *J* = 7.4 Hz, 3H). <sup>13</sup>C NMR (100 MHz, CDCl<sub>3</sub>):  $\delta$  159.2, 142.1, 139.6, 136.3, 133.1, 132.2, 130.4, 128.7, 128.3, 128.2, 128.1, 127.5, 127.4, 127.0, 126.9, 126.7, 126.1, 120.5, 94.7, 84.0, 63.7, 30.3, 8.6. HPLC (AD-H column, 85:15 *n*-Hex/*i*-PrOH, 30 °C, 1 mL/min): *t*<sub>R</sub> 10.09 min (minor) and 12.33 min (major).

**(*R*)-1-(2-((Trimethylsilyl)ethynyl)naphthalen-1-yl)isoquinoline (3Aq, Table 2).**

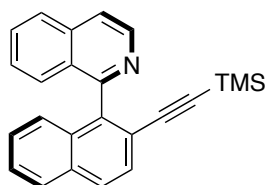

Following the general procedure using nonaflate **1A** and ethynyltrimethylsilane **2q**, purification by column chromatography (CH<sub>2</sub>Cl<sub>2</sub>→CH<sub>2</sub>Cl<sub>2</sub>/EtOAc 25:1) afforded **3Aq** (35 mg, 99%) as a beige amorphous solid. [ $\alpha$ ]<sub>D</sub><sup>20</sup> +223.7 (*c* 0.50, CHCl<sub>3</sub>) for 97 % ee.

<sup>1</sup>H NMR (400 MHz, CDCl<sub>3</sub>):  $\delta$  8.73 (*br* d, *J* = 5.7 Hz, 1H), 7.98-7.87 (m, 3H), 7.77 (d, *J* = 5.7 Hz, 1H), 7.69 (d, *J* = 7.2 Hz, 1H), 7.65 (d, *J* = 8.7 Hz, 1H), 7.53 (d, *J* = 8.5 Hz, 1H), 7.48 (*br* t,

$J = 7.4$  Hz, 1H), 7.41 (*br t*,  $J = 7.6$  Hz, 1H), 7.33 (*br t*,  $J = 7.6$  Hz, 1H), 7.27 (*br d*,  $J = 9.0$  Hz, 1H), -0.27 (*d*,  $J = 1.2$  Hz, 9H).  $^{13}\text{C}$  NMR (100 MHz,  $\text{CDCl}_3$ ):  $\delta$  159.4, 142.4, 140.8, 136.2, 133.2, 132.2, 130.1, 128.4, 128.3, 128.0, 127.8, 127.5, 127.1, 126.9, 126.6 (2C), 126.2, 120.9, 120.1, 104.1, 99.4, -0.7. HRMS (ESI) calcd. for  $\text{C}_{24}\text{H}_{22}\text{NSi}$  ( $\text{M} + \text{H}^+$ ) 352.1516. Found 352.1511. HPLC (AD-H column, 85:15 *n*-Hex/*i*-PrOH, 30 °C, 1 mL/min):  $t_{\text{R}}$  4.47 min (minor) and 5.20 min (major).

Reaction performed on a large scale: nonaflate **1A** (1.11 g, 2.0 mmol), ethynyltrimethylsilane **2q** (295 mg, 424  $\mu\text{L}$ , 3.0 mmol),  $\text{Pd}(\text{OAc})_2$  (1 mol%, 4.5 mg, 0.02 mmol), (*S*)-QUINAP (1.2 mol%, 10.5 mg, 0.024 mmol),  $\text{Et}_3\text{N}$  (405 mg, 558  $\mu\text{L}$ , 4.0 mmol) in DMSO (4 mL). After deprotection with TBAF (2.1 mL, 1.0M) in THF (15 mL) at room temperature, the corresponding terminal alkyne **3Aq** was obtained in 80% yield (447 mg) and 97% ee.

#### (*R*)-4-(2-(Phenylethynyl)naphthalen-1-yl)quinazoline. (**3Ba**, Table 3).

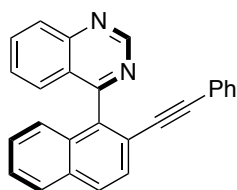

Following the general procedure using triflate **1B** and ethynylbenzene **2a**, purification by flash chromatography ( $\text{CH}_2\text{Cl}_2 \rightarrow 25:1 \text{CH}_2\text{Cl}_2/\text{EtOAc}$ ) afforded **3Ba** (35 mg, 99%) as a white amorphous solid.  $[\alpha]_{\text{D}}^{20} +209.2$  ( $c$  0.05,  $\text{CHCl}_3$ ) for 98 % ee.  $^1\text{H}$  NMR (400 MHz,  $\text{CDCl}_3$ ):  $\delta$  9.57 (*s*, 1H), 8.23 (*d*,  $J = 8.5$  Hz, 1H), 8.02 (*d*,  $J = 8.5$  Hz, 1H), 7.98-7.90 (*m*, 2H), 7.75 (*d*,  $J = 8.5$  Hz, 1H), 7.64-7.60 (*m*, 1H), 7.56-7.47 (*m*, 2H), 7.39 (*ddd*,  $J = 8.2, 6.8, 1.3$  Hz, 1H), 7.29 (*br d*,  $J = 8.4$  Hz, 1H), 7.21-7.08 (*m*, 3H), 6.81-6.75 (*m*, 2H).  $^{13}\text{C}$  NMR (100 MHz,  $\text{CDCl}_3$ ):  $\delta$  168.6, 155.0, 150.5, 137.0, 134.2, 133.0, 131.6, 131.2, 129.5, 128.7, 128.4, 128.3, 128.1 (2C), 128.0, 127.5, 127.3, 127.0, 125.7, 125.0, 122.4, 120.9, 94.9, 88.2. HRMS (ESI) calcd. for  $\text{C}_{26}\text{H}_{17}\text{N}_2$  ( $\text{M} + \text{H}^+$ ) 357.1386. Found 357.1382. HPLC (IA column, 85:15 *n*-Hex/*i*-PrOH, 30 °C, 1 mL/min):  $t_{\text{R}}$  9.20 min (major) and 11.63 min (minor).

#### (*R*)-4-(2-(Oct-1-yn-1-yl)naphthalen-1-yl)quinazoline (**3Bn**, Table 3).

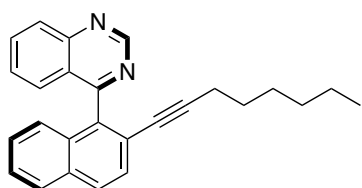

Following the general procedure using triflate **1B** and oct-1-yne **2n**, purification by flash chromatography ( $\text{CH}_2\text{Cl}_2 \rightarrow 25:1 \text{CH}_2\text{Cl}_2/\text{EtOAc}$ ) afforded **3Bn** (36 mg, 99%) as a light yellow

amorphous solid.  $[\alpha]^{20}_D +124.9$  ( $c$  0.49,  $\text{CHCl}_3$ ) for 97 % ee.  $^1\text{H NMR}$  (400 MHz,  $\text{CDCl}_3$ ):  $\delta$  9.52 (s, 1H), 8.17 (d,  $J = 8.5$  Hz, 1H), 7.98-7.86 (m, 3H), 7.61 (d,  $J = 8.5$  Hz, 1H), 7.55-7.52 (m, 1H), 7.50-7.45 (m, 2H), 7.34 (ddd,  $J = 8.3, 6.8, 1.3$  Hz, 1H), 7.17 (*br* dd,  $J = 8.5, 0.9$  Hz, 1H), 1.97 (td,  $J = 6.8, 1.3$  Hz, 2H), 1.20-1.08 (m, 2H), 1.05-0.90 (m, 4H), 0.83 (m, 5H).  $^{13}\text{C NMR}$  (100 MHz,  $\text{CDCl}_3$ ):  $\delta$  168.8, 154.9, 150.4, 136.6, 133.9, 132.5, 131.5, 129.2, 128.6, 128.5, 128.1, 127.7, 127.2 (2C), 126.4, 125.4, 125.0, 121.6, 96.5, 79.3, 31.1, 28.0, 27.9, 22.3, 19.1, 14.0. HRMS (ESI) calcd. for  $\text{C}_{26}\text{H}_{25}\text{N}_2$  ( $\text{M} + \text{H}^+$ ) 365.2012. Found 365.2007. HPLC (OJ-H column, 85:15 *n*-Hex/*i*-PrOH, 30 °C, 1 mL/min):  $t_R$  5.47 min (minor) and 9.03 min (major).

**(R)-4-(2-((Trimethylsilyl)ethynyl)naphthalen-1-yl)quinazoline (3Bq, Table 3).**

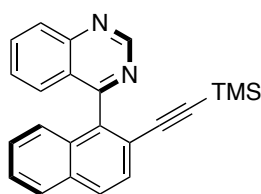

Following the general procedure using triflate **1B** and ethynyltrimethylsilane **2q**, purification by flash chromatography ( $\text{CH}_2\text{Cl}_2 \rightarrow 5:1 \text{ CH}_2\text{Cl}_2/\text{EtOAc}$ ) afforded **3Bq** (33 mg, 94%) as a colorless viscous oil.  $[\alpha]^{20}_D +325.0$  ( $c$  1.0,  $\text{CHCl}_3$ ) for 96 % ee.  $^1\text{H NMR}$  (400 MHz,  $\text{CDCl}_3$ ):  $\delta$  9.52 (s, 1H), 8.18 (d,  $J = 8.5$  Hz, 1H), 8.00-7.88 (m, 3H), 7.65 (d,  $J = 8.5$  Hz, 1H), 7.58-7.45 (m, 3H), 7.38 (ddd,  $J = 8.2, 6.9, 1.3$  Hz, 1H), 7.27 (*br* d,  $J = 9.1$  Hz, 1H), -0.25 (s, 9H).  $^{13}\text{C NMR}$  (100 MHz,  $\text{CDCl}_3$ ):  $\delta$  168.4, 154.8, 150.4, 138.0, 134.0, 133.0, 131.4, 129.2, 128.6, 128.2, 127.8, 127.7, 127.3, 127.2, 127.0, 125.6, 125.0, 120.7, 103.3, 100.5, -0.8. HRMS (ESI) calcd. for  $\text{C}_{23}\text{H}_{21}\text{N}_2\text{Si}$  ( $\text{M} + \text{H}^+$ ) 353.1469. Found 353.1454. HPLC (IA column, 90:10 *n*-Hex/*i*-PrOH, 30 °C, 1 mL/min):  $t_R$  5.58 min (major) and 6.48 min (minor).

**(R)-1-(2-(Phenylethynyl)naphthalen-1-yl)phthalazine (3Ca, Table 3).**

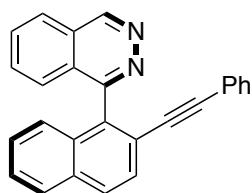

Following the general procedure using nonaflate **1C** and ethynylbenzene **2a**, purification by flash chromatography ( $\text{CH}_2\text{Cl}_2 \rightarrow 20:1 \text{ CH}_2\text{Cl}_2/\text{EtOAc}$ ) afforded **3Ca** (33 mg, 93%) as a light brown foam.  $[\alpha]^{20}_D +79.5$  ( $c$  0.50,  $\text{CHCl}_3$ ) for 94 % ee.  $^1\text{H NMR}$  (400 MHz,  $\text{CDCl}_3$ ):  $\delta$  9.72 (s, 1H), 8.11 (d,  $J = 8.1$  Hz, 1H), 8.02 (d,  $J = 8.5$  Hz, 1H), 7.97-7.87 (m, 2H), 7.80-7.71 (m, 2H), 7.57 (*br* d,  $J = 8.3$  Hz, 1H), 7.51 (ddd,  $J = 8.1, 6.6, 1.3$  Hz, 1H), 7.37 (ddd,  $J = 8.1, 6.7, 1.3$  Hz, 1H), 7.31 (dd,  $J = 8.6, 1.1$  Hz, 1H), 7.19-7.06 (m, 3H), 6.81-6.75 (m, 2H).  $^{13}\text{C NMR}$  (125 MHz,  $\text{CDCl}_3$ )  $\delta$  159.3, 150.8, 136.1, 133.0, 132.7, 132.5, 132.3,

131.1, 129.3, 128.2, 128.1 (2C), 128.0, 127.2, 126.9, 126.8, 126.5, 126.3, 125.9, 122.5, 121.7, 94.8, 88.4. HRMS (ESI) calcd. for C<sub>26</sub>H<sub>17</sub>N<sub>2</sub> (M + H<sup>+</sup>) 357.1386. Found 357.1382. HPLC (IA column, 85:15 *n*-Hex/*i*-PrOH, 30 °C, 1 mL/min): t<sub>R</sub> 17.16 min (major) and 24.76 min (minor).

**(R)-1-(2-(Oct-1-yn-1-yl)naphthalen-1-yl)phthalazine (3Cn, Table 3).**

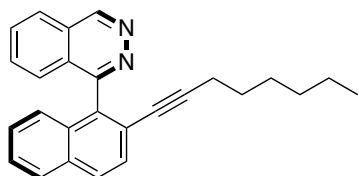

Following the general procedure using nonaflate **1C** and oct-1-yne **2n**, purification by flash chromatography (CH<sub>2</sub>Cl<sub>2</sub>→20:1 CH<sub>2</sub>Cl<sub>2</sub>/EtOAc) afforded **3Cn** (31 mg, 85%) as a light yellow foam. [α]<sub>D</sub><sup>20</sup> +87.6 (*c* 0.48, CHCl<sub>3</sub>) for 93 % ee.

<sup>1</sup>H NMR (400 MHz, CDCl<sub>3</sub>): δ 9.66 (d, *J* = 1.0 Hz, 1H), 8.07 (*br d*, *J* = 8.1, 1H), 7.95 (d, *J* = 8.5 Hz, 1H), 7.93-7.88 (m, 2H), 7.74 (ddd, *J* = 8.3, 7.0, 1.2 Hz, 1H), 7.63 (d, *J* = 8.5 Hz, 1H), 7.53-7.49 (m, 1H), 7.47 (ddd, *J* = 8.1, 6.8, 1.2 Hz, 1H), 7.32 (ddd, *J* = 8.2, 6.8, 1.3 Hz, 1H), 7.20 (dd, *J* = 8.5, 1.0 Hz, 1H), 1.94 (td, *J* = 6.9, 1.1 Hz, 2H), 1.17-1.05 (m, 2H), 1.01-0.86 (m, 4H), 0.84-0.75 (m, 5H). <sup>13</sup>C NMR (100 MHz, CDCl<sub>3</sub>): δ 159.6, 150.7, 135.6, 132.6, 132.5, 132.4, 132.3 (2C), 129.1, 128.5, 128.0, 127.0 (2C), 126.5, 126.3, 125.7, 122.5, 96.3, 79.6, 31.1, 28.0, 27.9, 22.3, 19.1, 14.0. HRMS (ESI) calcd. for C<sub>26</sub>H<sub>25</sub>N<sub>2</sub> (M + H<sup>+</sup>) 365.2012. Found 365.2006. HPLC (AD-H column, 85:15 *n*-Hex/*i*-PrOH, 30 °C, 1 mL/min): t<sub>R</sub> 10.00 min (major) and 11.56 min (minor).

**(R)-1-(2-((Trimethylsilyl)ethynyl)naphthalen-1-yl)phthalazine (3Cq, Table 3).**

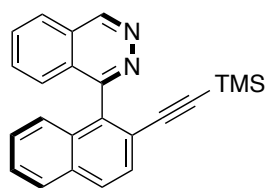

Following the general procedure using nonaflate **1C** and ethynyltrimethylsilane **2q**, purification by flash chromatography (CH<sub>2</sub>Cl<sub>2</sub>→3:1 CH<sub>2</sub>Cl<sub>2</sub>/EtOAc) afforded **3Cq** (32 mg, 91%) as a pale brown foam. [α]<sub>D</sub><sup>20</sup> +318.5 (*c* 0.6, CHCl<sub>3</sub>) for 92 % ee.

<sup>1</sup>H NMR (400 MHz, CDCl<sub>3</sub>): δ 9.66 (s, 1H), 8.08 (*br d*, *J* = 8.1, 1H), 7.97 (*br d*, *J* = 8.5 Hz, 1H), 7.95-7.89 (m, 2H), 7.75 (ddd, *J* = 8.3, 7.0, 1.2 Hz, 1H), 7.66 (d, *J* = 8.5 Hz, 1H), 7.57-7.46 (m, 2H), 7.41-7.28 (m, 2H), -0.28 (s, 9H). <sup>13</sup>C NMR (100 MHz, CDCl<sub>3</sub>): δ 159.3, 150.7, 137.1, 133.2, 132.5, 132.4, 132.2, 129.2, 128.1, 127.9, 127.2, 126.9, 126.5, 126.3 (2C), 126.0, 121.5, 103.7, 100.3, -0.7. HRMS (ESI) calcd. for C<sub>23</sub>H<sub>21</sub>N<sub>2</sub>Si (M + H<sup>+</sup>) 353.1469. Found 353.1455. HPLC (AD-H column, 90:10 *n*-Hex/*i*-PrOH, 30 °C, 1 mL/min): t<sub>R</sub> 10.58 min (major) and 16.18 min (minor).

**(R)-3-Methyl-2-(2-(phenylethynyl)naphthalen-1-yl)pyridine (3Da, Table 3).**

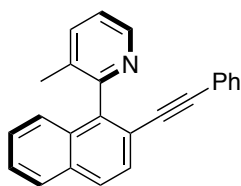

Following the general procedure using triflate **1D** and ethynylbenzene **2a**, purification by flash chromatography ( $\text{CH}_2\text{Cl}_2 \rightarrow 25:1 \text{ CH}_2\text{Cl}_2/\text{EtOAc}$ ) afforded **3Da** (28 mg, 89%) as a white foam.  $[\alpha]_D^{20} +28.8$  ( $c$  0.52,  $\text{CHCl}_3$ ) for 95 % ee.  $^1\text{H NMR}$  (400 MHz,  $\text{CDCl}_3$ ):  $\delta$  8.68 (dd,  $J = 4.9, 1.6$  Hz, 1H), 7.90 (*br d*,  $J = 8.6$  Hz, 2H), 7.73 (*br d*,  $J = 7.7$  Hz, 1H), 7.70 (d,  $J = 8.5$  Hz, 1H), 7.50 (ddd,  $J = 8.1, 6.7, 1.2$  Hz, 1H), 7.42 (ddd,  $J = 8.2, 6.7, 1.3$  Hz, 1H), 7.36 (dd,  $J = 7.7, 4.8$  Hz, 1H), 7.32 (d,  $J = 8.4$  Hz, 1H), 7.28-7.22 (m, 3H), 7.18-7.12 (m, 2H), 2.14 (s, 3H).  $^{13}\text{C NMR}$  (100 MHz,  $\text{CDCl}_3$ ):  $\delta$  157.5, 147.0, 141.1, 137.6, 133.4, 133.2, 131.5, 131.4, 128.1 (3C), 126.9, 126.5, 125.7, 123.2, 122.6, 120.0, 93.0, 88.7, 18.6. HRMS (ESI) calcd. for  $\text{C}_{24}\text{H}_{18}\text{N}$  ( $\text{M} + \text{H}^+$ ) 320.1434. Found 320.1430. HPLC (AD-H column, 85:15 *n*-Hex/*i*-PrOH, 30 °C, 1 mL/min):  $t_R$  6.98 min (major) and 7.75 min (minor).

**(R)-Methyl-2-(2-(oct-1-yn-1-yl)naphthalen-1-yl)pyridine (3Dn, Table 3).**

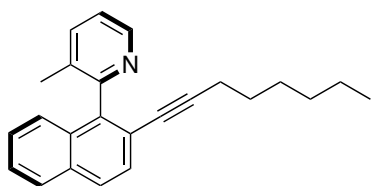

Following the general procedure using triflate **1D** and oct-1-yne **2n**, purification by flash chromatography ( $\text{CH}_2\text{Cl}_2 \rightarrow 25:1 \text{ CH}_2\text{Cl}_2/\text{EtOAc}$ ) afforded **3Dn** (32 mg, 99%) as a white foam.  $[\alpha]_D^{20} +71.6$  ( $c$  0.49,  $\text{CHCl}_3$ ) for 88 % ee.  $^1\text{H NMR}$  (400 MHz,  $\text{CDCl}_3$ )  $\delta$  8.62 (dd,  $J = 4.9, 1.6$  Hz, 1H), 7.84 (d,  $J = 8.2$  Hz, 1H), 7.81 (d,  $J = 8.5$  Hz, 1H), 7.66 (d,  $J = 7.7$  Hz, 1H), 7.54 (d,  $J = 8.5$  Hz, 1H), 7.44 (ddd,  $J = 8.1, 6.8, 1.2$  Hz, 1H), 7.35 (ddd,  $J = 8.2, 6.8, 1.3$  Hz, 1H), 7.31-7.25 (m, 1H), 7.20 (d,  $J = 8.5$  Hz, 1H), 2.19 (t,  $J = 6.8$  Hz, 2H), 2.08 (s, 3H), 1.34-1.10 (m, 8H), 0.89 (t,  $J = 7.2$  Hz, 3H).  $^{13}\text{C NMR}$  (100 MHz,  $\text{CDCl}_3$ )  $\delta$  157.7, 146.9, 140.4, 137.5, 133.2, 132.8, 131.6, 128.6, 128.0, 127.9, 126.6, 126.0, 125.5, 122.4, 120.8, 94.3, 79.6, 31.4, 28.4, 28.2, 22.5, 19.3, 18.6, 14.1. HRMS (ESI) calcd. for  $\text{C}_{24}\text{H}_{26}\text{N}$  ( $\text{M} + \text{H}^+$ ) 328.2060. Found 328.2055. HPLC (AD-H column, 85:15 *n*-Hex/*i*-PrOH, 30 °C, 1 mL/min):  $t_R$  4.24 min (minor) and 4.61 min (major).



**(R)-3-Methyl-2-(2-((trimethylsilyl)ethynyl)naphthalen-1-yl)pyridine (3Dq, Table 3).**

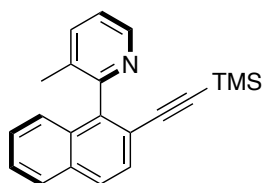

Following the general procedure using triflate **1D** and ethynyltrimethylsilane **2q**, purification by flash chromatography ( $\text{CH}_2\text{Cl}_2 \rightarrow 25:1 \text{ CH}_2\text{Cl}_2/\text{EtOAc}$ ) afforded **3Dq** (30 mg, 96%) as a light yellow oil.  $[\alpha]^{20}_{\text{D}} +79.8$  ( $c$  0.51,  $\text{CHCl}_3$ ) for 90 % ee.  $^1\text{H NMR}$  (400 MHz,  $\text{CDCl}_3$ ):  $\delta$  8.61 (ddd,  $J = 4.8, 1.4, 0.6$  Hz, 1H), 7.86 (*br d*,  $J = 8.1$  Hz, 1H), 7.83 (*br d*,  $J = 8.3$  Hz, 1H), 7.66 (ddd,  $J = 7.7, 1.5, 0.7$  Hz, 1H), 7.58 (d,  $J = 8.5$  Hz, 1H), 7.47 (ddd,  $J = 8.1, 6.8, 1.3$  Hz, 1H), 7.38 (ddd,  $J = 8.2, 6.8, 1.4$  Hz, 1H), 7.31-7.25 (m, 2H), 2.08 (s, 3H), 0.01 (s, 9H).  $^{13}\text{C NMR}$  (100 MHz,  $\text{CDCl}_3$ ):  $\delta$  157.3, 146.9, 142.0, 137.4, 133.2, 133.2, 131.4, 128.1, 128.0, 127.9, 126.8, 126.5, 125.7, 122.5, 119.9, 104.0, 98.1, 18.5, -0.3. HRMS (ESI) calcd. for  $\text{C}_{21}\text{H}_{22}\text{NSi}$  ( $\text{M} + \text{H}^+$ ) 316.1516. Found 316.1512. HPLC (OJ-H column, 99:1 *n*-Hex/*i*-PrOH, 30 °C, 1 mL/min):  $t_{\text{R}}$  7.10 min (major) and 9.93 min (minor).

**(R)-1-(4-Methoxy-2-(phenylethynyl)naphthalen-1-yl) (3Ea, Table 3).**

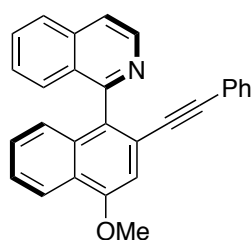

Following the general procedure using nonaflate **1E** and ethynylbenzene **2a**, purification by flash chromatography ( $\text{CH}_2\text{Cl}_2 \rightarrow 20:1 \text{ CH}_2\text{Cl}_2/\text{EtOAc}$ ) afforded **3Ea** (37 mg, 96%) as a pale yellow solid. X-ray quality crystals (colorless prisms) were obtained by slow evaporation of a solution of **3Ea** in  $\text{CH}_2\text{Cl}_2$ . M. p. 155-160 °C (decomposition).  $[\alpha]^{20}_{\text{D}} +436.4$  ( $c$  0.51,  $\text{CHCl}_3$ ) for 95 % ee.  $^1\text{H NMR}$  (400 MHz,  $\text{CDCl}_3$ ):  $\delta$  8.76 (d,  $J = 5.7$  Hz, 1H), 8.35 (d,  $J = 8.4$  Hz, 1H), 7.96 (d,  $J = 8.2$  Hz, 1H), 7.79 (d,  $J = 5.7$  Hz, 1H), 7.68 (ddd,  $J = 8.2, 6.8, 1.2$  Hz, 1H), 7.64 (d,  $J = 8.5$  Hz, 1H), 7.49 (ddd,  $J = 8.2, 6.7, 1.2$  Hz, 1H), 7.42 (ddd,  $J = 8.3, 6.8, 1.1$  Hz, 1H), 7.36 (ddd,  $J = 8.2, 6.7, 1.3$  Hz, 1H), 7.25 (*br d*,  $J = 8.4$  Hz, 1H), 7.20-7.06 (m, 4H), 6.76 (d,  $J = 6.9$  Hz, 2H), 4.12 (s, 3H).  $^{13}\text{C NMR}$  (100 MHz,  $\text{CDCl}_3$ ):  $\delta$  159.6, 155.4, 142.5, 136.3, 133.4, 132.7, 131.2, 130.2, 128.7, 128.0, 127.9, 127.7, 127.4, 127.2, 126.7, 126.0 (2C), 125.7, 122.9, 122.1, 121.0, 120.1, 105.8, 93.6, 89.3, 55.8. HRMS (ESI) calcd. for  $\text{C}_{28}\text{H}_{20}\text{NO}$  ( $\text{M} + \text{H}^+$ ) 386.1539. Found 386.1533. HPLC (AD-H column, 85:15 *n*-Hex/*i*-PrOH, 30 °C, 1 mL/min):  $t_{\text{R}}$  min 11.62 (minor) and min 16.23 (major).

**(R)-1-(4-Methoxy-2-(oct-1-yn-1-yl)naphthalen-1-yl)isoquinoline (3En, Table 3).**

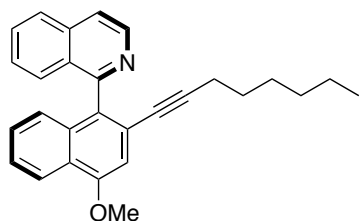

Following the general procedure using nonaflate **1E** and oct-1-yne **2n**, purification by flash chromatography ( $\text{CH}_2\text{Cl}_2 \rightarrow \text{CH}_2\text{Cl}_2/\text{EtOAc}$  20:1) afforded **3En** (34 mg, 86%) as a white foam.  $[\alpha]^{20}_{\text{D}} +219.0$  ( $c$  0.50,  $\text{CHCl}_3$ ) for 85 % ee.  $^1\text{H}$  NMR (400MHz,  $\text{CDCl}_3$ ):  $\delta$  8.72 (d,  $J = 5.7$  Hz, 1H), 8.31 (d,  $J = 8.4$  Hz, 1H), 7.91 (d,  $J = 8.2$  Hz, 1H), 7.73 (d,  $J = 5.8$  Hz, 1H), 7.66 (ddd,  $J = 8.2, 6.8, 1.2$  Hz, 1H), 7.56 (d,  $J = 8.4$  Hz, 1H), 7.46-7.37 (m, 2H), 7.30 (ddd,  $J = 8.3, 6.8, 1.3$  Hz, 1H), 7.12 (*br* d,  $J = 8.5$  Hz, 1H), 6.95 (s, 1H), 4.08 (s, 3H), 1.96 (td,  $J = 6.8, 2.1$  Hz, 2H), 1.19-1.06 (m, 2H), 1.01-0.87 (m, 4H), 0.86-0.74 (m, 5H).  $^{13}\text{C}$  NMR (100 MHz,  $\text{CDCl}_3$ ):  $\delta$  160.0, 155.3, 142.4, 136.3, 133.4, 132.1, 130.0, 128.7, 127.7, 127.2, 127.0, 126.6, 125.8, 125.5, 125.2, 121.9, 121.7, 119.9, 106.3, 95.0, 80.2, 55.7, 31.2, 28.1, 27.9, 22.3, 19.1, 14.1. HRMS (ESI) calcd. for  $\text{C}_{28}\text{H}_{28}\text{NO}$  ( $\text{M} + \text{H}^+$ ) 394.2165. Found 394.2160. HPLC (AD-H column, 85:15 *n*-Hex/*i*-PrOH, 30 °C, 1 mL/min):  $t_{\text{R}}$  5.13 min (minor) and 10.03 min (major).

**(R)-1-(4-Methoxy-2-((trimethylsilyl)ethynyl)naphthalen-1-yl)isoquinoline (3Eq, Table 3).**

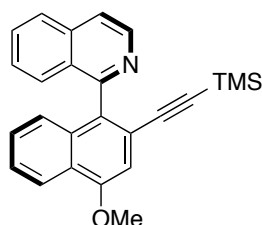

Following the general procedure using nonaflate **1E** and ethynyltrimethylsilane **2q**, purification by flash chromatography ( $\text{CH}_2\text{Cl}_2 \rightarrow 20:1 \text{ CH}_2\text{Cl}_2/\text{EtOAc}$ ) afforded **3Eq** (37 mg, 97%) as a light yellow oil.  $[\alpha]^{20}_{\text{D}} +229.9$  ( $c$  0.49,  $\text{CHCl}_3$ ) for 92 % ee.  $^1\text{H}$  NMR (400 MHz,  $\text{CDCl}_3$ ):  $\delta$  8.72 (d,  $J = 5.7$  Hz, 1H), 8.32 (ddd,  $J = 8.5, 1.4, 0.7$  Hz, 1H), 7.92 (*br* d,  $J = 8.3$  Hz, 1H), 7.74 (dd,  $J = 5.7, 0.9$  Hz, 1H), 7.67 (ddd,  $J = 8.2, 6.8, 1.2$  Hz, 1H), 7.57 (*br* dd,  $J = 8.5, 1.0$  Hz, 1H), 7.47 (ddd,  $J = 8.3, 6.8, 1.3$  Hz, 1H), 7.41 (ddd,  $J = 8.3, 6.8, 1.2$  Hz, 1H), 7.34 (ddd,  $J = 8.2, 6.8, 1.3$  Hz, 1H), 7.23 (ddd,  $J = 8.5, 1.3, 0.8$  Hz, 1H), 6.98 (s, 1H), 4.08 (s, 3H), -0.28 (s, 9H).  $^{13}\text{C}$  NMR (100 MHz,  $\text{CDCl}_3$ ):  $\delta$  159.5, 155.3, 142.4, 136.3, 133.3, 132.1, 130.0, 128.7, 127.7, 127.3, 127.0, 126.6, 126.0 (2C), 125.7, 122.0, 120.8, 120.0, 105.6, 104.6, 98.8, 55.7, -0.7. HRMS (ESI) calcd. for  $\text{C}_{25}\text{H}_{24}\text{NOSi}$  ( $\text{M} + \text{H}^+$ ) 382.1622. Found 382.1617. HPLC (AD-H column, 85:15 *n*-Hex/*i*-PrOH, 30 °C, 1 mL/min):  $t_{\text{R}}$  4.31 min (minor) and 8.79 min (major).

### Procedure for the cleavage of TMS-protected alkynes **3Aq**, **3Bq**, **3Cq**.

TBAF (1.0 M, 1.07 equiv.) was slowly added to a solution of the corresponding TMS-protected alkyne (1.00 equiv) in THF (5 mL/mmol) at room temperature and the solution was stirred for 30 min. Then, SiO<sub>2</sub> was added to the reaction crude and the solvents were removed under *vacuum*. The resulting solid was purified through a short pad of silica gel (5:1 CH<sub>2</sub>Cl<sub>2</sub>/AcOEt) to yield the corresponding pure terminal alkynes.

#### (*R*)-1-(2-Ethynynaphthalen-1-yl)isoquinoline (**4A**, Table 2).

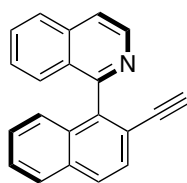

Following the general procedure using TMS-alkyne **3Aq** (91 mg, 0.26 mmol) afforded **4A** (68 mg, 94%) as a beige solid. M. p. 149-151 °C.  $[\alpha]_D^{20} +81.8$  (*c* 0.25, CHCl<sub>3</sub>) for 97 % ee. <sup>1</sup>H NMR (400 MHz, CDCl<sub>3</sub>) δ 8.75 (d, *J* = 5.7 Hz, 1H), 8.01-7.88 (m, 3H), 7.79 (d, *J* = 5.7 Hz, 1H), 7.75-7.64 (m, 2H), 7.54-7.37 (m, 3H), 7.31 (t, *J* = 7.7 Hz, 1H), 7.14 (d, *J* = 8.5 Hz, 1H), 2.77 (s, 1H). <sup>13</sup>C NMR (100 MHz, CDCl<sub>3</sub>) δ 159.0, 142.5, 140.5, 136.2, 133.2, 132.2, 130.3, 128.7, 128.6, 128.2, 128.0, 127.4, 127.2, 127.0, 126.9, 126.8, 126.2, 120.5, 119.8, 82.4, 81.3. HRMS (ESI) for calcd. C<sub>21</sub>H<sub>14</sub>N for (M + H<sup>+</sup>) 280.1121. Found 280.1120. HPLC (AD-H column, 85:15 *n*-Hex/*i*-PrOH, 30 °C, 1 mL/min): *t*<sub>R</sub> 7.84 min (minor) and 8.52 min (major).

#### (*R*)-4-(2-Ethynynaphthalen-1-yl)quinazoline (**4B**, Table 3).

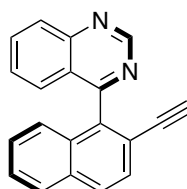

Following the general procedure using TMS-alkyne **3Bq** (33 mg, 0.094 mmol) afforded **4B** (26 mg, 99%) as a brown viscous oil.  $[\alpha]_D^{20} +159.0$  (*c* 0.7, CHCl<sub>3</sub>) for 95% ee. <sup>1</sup>H NMR (400 MHz, CDCl<sub>3</sub>): δ 9.68 (s, 1H), 8.09 (*br* d, *J* = 8.1, 1H), 7.99 (*br* d, *J* = 8.5, 1H), 7.96-7.88 (m, 2H), 7.77-7.70 (m, 2H), 7.51 (ddd, *J* = 8.2, 6.8, 1.2 Hz, 1H), 7.45 (*br* dd, *J* = 8.3, 1.0 Hz, 1H), 7.34 (ddd, *J* = 8.3, 6.8, 1.3 Hz, 1H), 7.18 (dd, *J* = 8.5, 1.0 Hz, 1H), 2.78 (s, 1H). <sup>13</sup>C NMR (100 MHz, CDCl<sub>3</sub>): δ 168.0, 154.9, 150.5, 137.8, 134.1, 133.1, 131.4, 129.4, 128.7, 128.6, 128.2, 128.0, 127.4, 127.1, 126.9, 125.7, 124.9, 119.5, 82.3, 81.8. HRMS (ESI) calcd. for C<sub>20</sub>H<sub>13</sub>N<sub>2</sub> (M + H<sup>+</sup>) 281.1073. Found 281.1063. HPLC (AS-H column, 90:10 *n*-Hex/*i*-PrOH, 30 °C, 1 mL/min): *t*<sub>R</sub> 9.04 min (major) and 9.87 min (minor).

### (*R*)-1-(2-Ethynynaphthalen-1-yl)phthalazine (3C, Table 3).

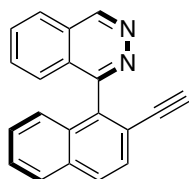

Following the general procedure using TMS-alkyne **3Cq** (32 mg, 0.091 mmol) afforded **4C** (23 mg, 90%) as a light brown amorphous solid.  $[\alpha]^{20}_{\text{D}} +139.0$  (*c* 0.7, CHCl<sub>3</sub>) for 92 % ee. <sup>1</sup>H NMR (400 MHz, CDCl<sub>3</sub>): δ 9.68 (s, 1H), 8.09 (*br d*, *J* = 8.1 Hz, 1H), 7.99 (d, *J* = 8.5 Hz, 1H), 7.97-7.87 (m, 2H), 7.79-7.68 (m, 2H), 7.45 (*br dd*, *J* = 8.4, 1.0 Hz, 1H), 7.34 (ddd, *J* = 8.3, 6.8, 1.3 Hz, 1H), 7.34 (ddd, *J* = 8.3, 6.8, 1.3 Hz, 1H), 7.18 (*br dd*, *J* = 8.5, 1.1 Hz, 1H), 2.78 (s, 1H). <sup>13</sup>C NMR (100 MHz, CDCl<sub>3</sub>): δ 158.9, 151.0, 137.0, 133.2, 132.7, 132.5, 132.2, 129.3, 128.6, 128.1, 127.3, 127.0, 126.8, 126.5, 126.5, 125.9, 125.9, 120.4, 82.2, 82.0. HRMS (ESI) calcd. for C<sub>20</sub>H<sub>13</sub>N<sub>2</sub> (M + H<sup>+</sup>) 281.1073. Found 281.1064. HPLC (AD-H column, 80:20 *n*-Hex/*i*-PrOH, 30 °C, 1 mL/min): *t*<sub>R</sub> 12.10 min (major) and 12.92 min (minor).

### Preparation of (*R*)-1-(2-vinylnaphthalen-1-yl)isoquinoline (5, Scheme 2).

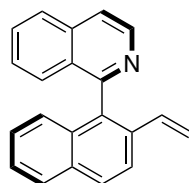

Following a described methodology,<sup>8</sup> a dried Schlenk tube was charged with IPrCuCl (2.7 mg, 5 mol%) and Na<sup>t</sup>BuO (0.5 mg, 5 mol%) and after cycles of vacuum-N<sub>2</sub> anhydrous THF (0.5 mL) was added. The resulting reaction mixture was stirred 1 hour at room temperature, and then the solvent was removed under vacuum and anhydrous toluene (1 mL) was added and the solution was transferred *via* cannula to a dried Schlenk tube containing **4A** (28 mg, 0.1 mmol). PMHS (0.12 mmol, 7.1 μL) and *t*BuOH (0.12 mmol, 11.5 μL) were added and the reaction mixture was stirred overnight at rt. Then, reaction crude was concentrated to dryness and purified by flash chromatography (5:1 *n*-hexane/EtOAc) to afford **5** (23 mg, 82%) as a viscous oil.  $[\alpha]^{20}_{\text{D}} +10.0$  (*c* 0.5, CHCl<sub>3</sub>) for 97 % ee. <sup>1</sup>H NMR (400 MHz, CDCl<sub>3</sub>) δ 8.75 (d, *J* = 5.7 Hz, 1H), 7.99-7.87 (m, 4H), 7.79 (*br d*, *J* = 5.7 Hz, 1H), 7.68 (ddd, *J* = 8.2, 6.1, 1.9 Hz, 1H), 7.45-7.35 (m, 3H), 7.27-7.21 (m, 1H), 7.01 (*br dd*, *J* = 8.5, 1.0 Hz, 1H), 6.27 (dd, *J* = 17.4, 11.0 Hz, 1H), 5.80 (dd, *J* = 17.5, 0.9 Hz, 1H), 5.10 (dd, *J* = 11.0, 0.9 Hz, 1H). <sup>13</sup>C NMR (100 MHz, CDCl<sub>3</sub>) δ 159.6, 142.6, 136.1, 134.6, 134.5, 133.8, 133.1, 132.9, 130.4, 128.8 (2C), 127.9, 127.5, 127.4, 126.9, 126.5, 126.3, 125.8, 122.5, 120.2, 115.6. HRMS (ESI) calcd. for C<sub>21</sub>H<sub>16</sub>N (M + H<sup>+</sup>) 282.1277. Found 282.1278. HPLC (OD column, 90:10 *n*-Hex/*i*-PrOH, 30 °C, 1 mL/min): *t*<sub>R</sub> 8.32 min (minor) and 9.39 min (major).

**Preparation of (R)-1-(2-(1-Benzyl-1H-1,2,3-triazol-4-yl)naphthalen-1-yl)isoquinoline (6, Scheme 2).**

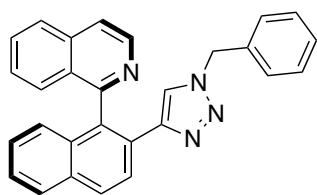

To a mixture of terminal alkyne **4A** (28 mg, 0.10 mmol) and benzyl azide (20 mg, 0.15 mmol) in *t*-BuOH (3 mL) and water (240  $\mu$ L), a solution of CuSO<sub>4</sub>·5H<sub>2</sub>O (0.1 M in water, 100  $\mu$ L, 0.01 mmol) and (*L*)-sodium ascorbate (0.1 M in water, 200  $\mu$ L, 0.02 mmol) were then sequentially added. The resulting mixture was stirred at 35 °C for 5 h. The reaction mixture was allowed to reach room temperature, washed with a saturated aqueous solution of NH<sub>3</sub>, and extracted with DCM (3× 5 mL). The combined organic phase was dried over anhydrous Na<sub>2</sub>SO<sub>4</sub>, filtered, concentrated to dryness, and the crude product was purified by column chromatography (CH<sub>2</sub>Cl<sub>2</sub>→3:1 CH<sub>2</sub>Cl<sub>2</sub>/EtOAc) affording **6** (31 mg, 76%) as a pale yellow solid.  $[\alpha]^{20}_{\text{D}} +23.1$  (*c* 0.26, CHCl<sub>3</sub>) for 97 % ee. <sup>1</sup>H NMR (400 MHz, CDCl<sub>3</sub>)  $\delta$  8.60 (d, *J* = 5.7 Hz, 1H), 8.42 (d, *J* = 8.7 Hz, 1H), 8.10 (d, *J* = 8.7 Hz, 1H), 7.95 (d, *J* = 8.2 Hz, 1H), 7.80 (d, *J* = 8.2 Hz, 1H), 7.64 (d, *J* = 5.8 Hz, 1H), 7.59 (dd, *J* = 8.4, 6.6 Hz, 1H), 7.46 (t, *J* = 7.5 Hz, 1H), 7.34-7.17 (m, 6H), 7.11 (d, *J* = 8.5 Hz, 1H), 6.73 (d, *J* = 7.6 Hz, 2H), 5.92 (s, 1H), 5.21 (d, *J* = 14.9 Hz, 1H), 5.11 (d, *J* = 14.9 Hz, 1H). <sup>13</sup>C NMR (100 MHz, CDCl<sub>3</sub>)  $\delta$  160.0, 146.2, 142.1, 136.2, 134.1, 133.3, 133.2, 132.7, 130.5, 129.1, 128.8, 128.3, 128.1, 128.0, 127.9, 127.8, 127.5, 126.7, 126.7, 126.6, 126.1, 126.1, 125.7, 122.0, 120.6, 53.6. HRMS (ESI) calcd. for C<sub>28</sub>H<sub>21</sub>N<sub>4</sub> (M + H<sup>+</sup>) 413.1761. Found 413.1753. HPLC (AD-H column, 85:15 *n*-Hex/*i*-PrOH, 30 °C, 1 mL/min): *t*<sub>R</sub> 20.51 min (minor) and 27.53 min (major).

**Preparation of (R)-1-(2-Ethynynaphthalen-1-yl)isoquinoline N-oxide (7, Scheme 2).**

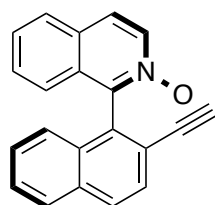

Over a cooled (0 °C) solution of (*R*)-**4A** (100 mg, 0.36 mmol, 97% ee) in THF (5 mL), *m*-CPBA acid (77%; 160 mg, 0.72 mmol) was added in portions. The resulting mixture was warmed to rt and stirred for 3 hours. Then, CH<sub>2</sub>Cl<sub>2</sub> (10 mL) was added and the mixture was washed once with saturated aqueous Na<sub>2</sub>CO<sub>3</sub>. The organic layer was dried over anhydrous Na<sub>2</sub>SO<sub>4</sub>, filtered, concentrated, and the resulting residue was purified by flash chromatography (CH<sub>2</sub>Cl<sub>2</sub>→5:1 EtOAc/MeOH) to afford (*R*)-**7** (100 mg, 94%) as a white foam.  $[\alpha]^{20}_{\text{D}} +1.2$  (*c* 1.0, CHCl<sub>3</sub>) for 97 % ee. <sup>1</sup>H NMR (400 MHz, CDCl<sub>3</sub>)  $\delta$  8.39 (d, *J* = 7.2

Hz, 1H), 8.00 (dd,  $J = 8.6, 0.8$  Hz, 1H), 7.94 (dt,  $J = 8.3, 0.9$  Hz, 1H), 7.87 (dt,  $J = 8.2, 0.9$  Hz, 1H), 7.80 (d,  $J = 7.2$  Hz, 1H), 7.74 (d,  $J = 8.5$  Hz, 1H), 7.59-7.47 (m, 2H), 7.45-7.34 (m, 2H), 7.17 (dd,  $J = 8.5, 1.1$  Hz, 1H), 7.09 (dd,  $J = 8.5, 1.0$  Hz, 1H), 2.86 (s, 1H).  $^{13}\text{C}$  NMR (100 MHz,  $\text{CDCl}_3$ )  $\delta$  144.1, 137.5, 133.3, 132.7, 131.1, 129.9, 129.8, 129.4, 128.9, 128.7, 128.5, 128.4, 127.7, 127.2, 126.9, 125.0 (2C), 123.9, 120.9, 81.5 (2C). HRMS (ESI) calcd. for  $\text{C}_{21}\text{H}_{14}\text{NO}$  ( $\text{M} + \text{H}^+$ ) 296.1070. Found 296.1070. HPLC (AD-H column, 70:30 *n*-Hex/*i*-PrOH, 30 °C, 1 mL/min):  $t_{\text{R}}$  9.44 min (minor) and 10.12 min (major).

## NMR Spectra:

$^1\text{H}$  NMR ( $\text{CDCl}_3$ , 400 MHz) of 1-(Isoquinolin-1-yl)-4-methoxynaphthalen-2-ol:

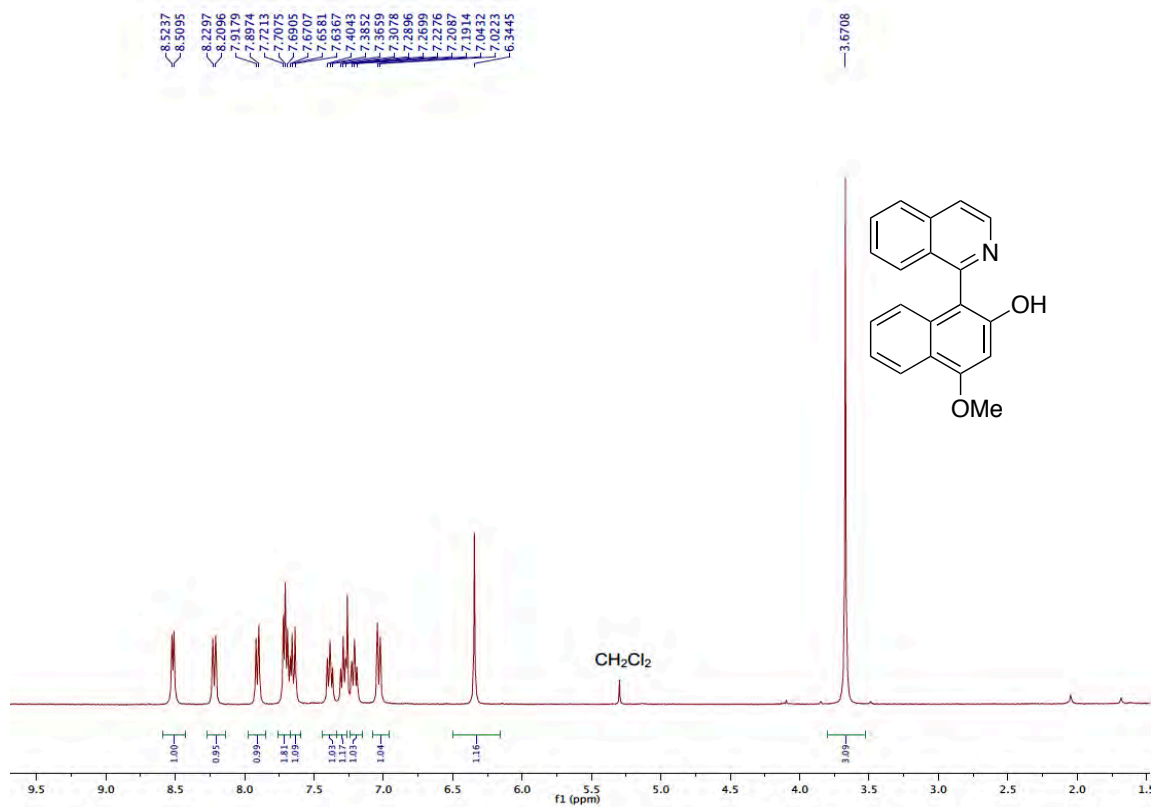

$^{13}\text{C}$  NMR ( $\text{CDCl}_3$ , 100 MHz) of 1-(Isoquinolin-1-yl)-4-methoxynaphthalen-2-ol:

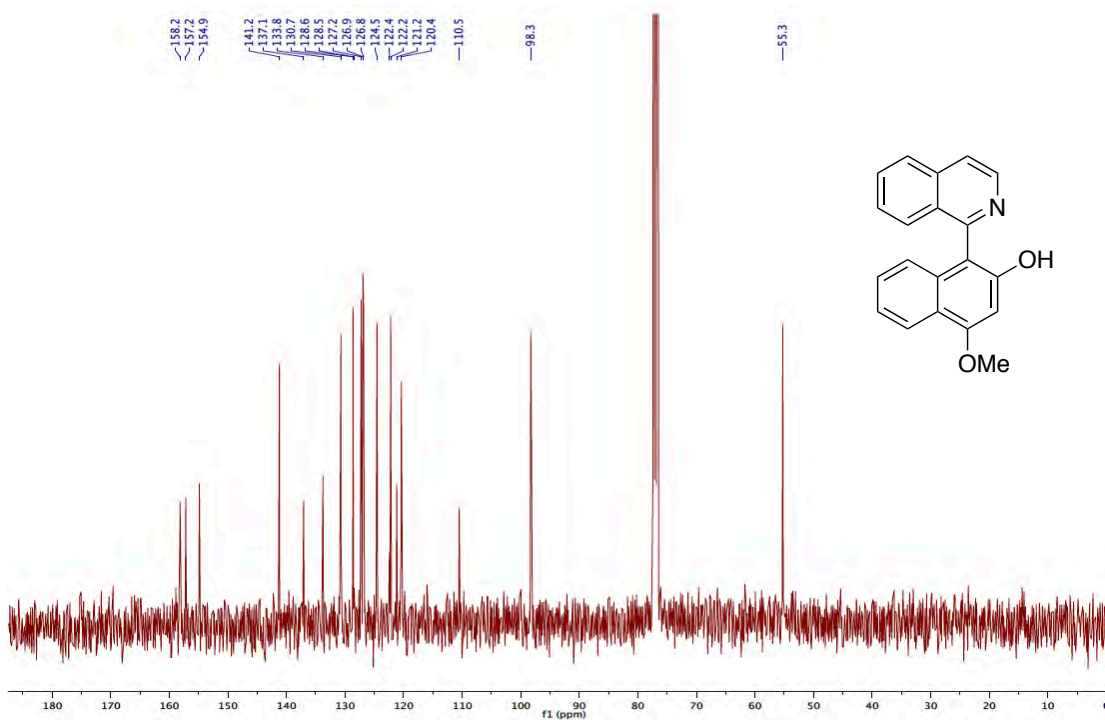

$^1\text{H}$  NMR (400 MHz,  $\text{CDCl}_3$ ) of **1A**

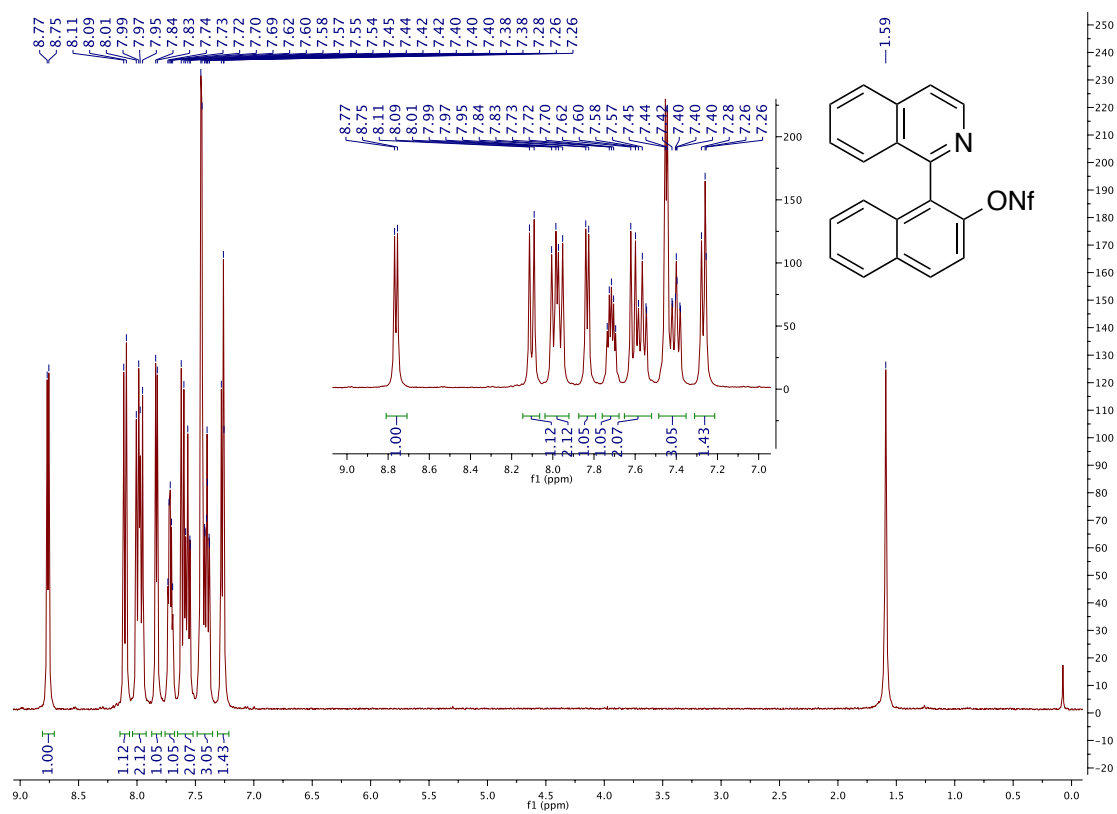

$^{13}\text{C}$  NMR (100 MHz,  $\text{CDCl}_3$ ) of **1A**

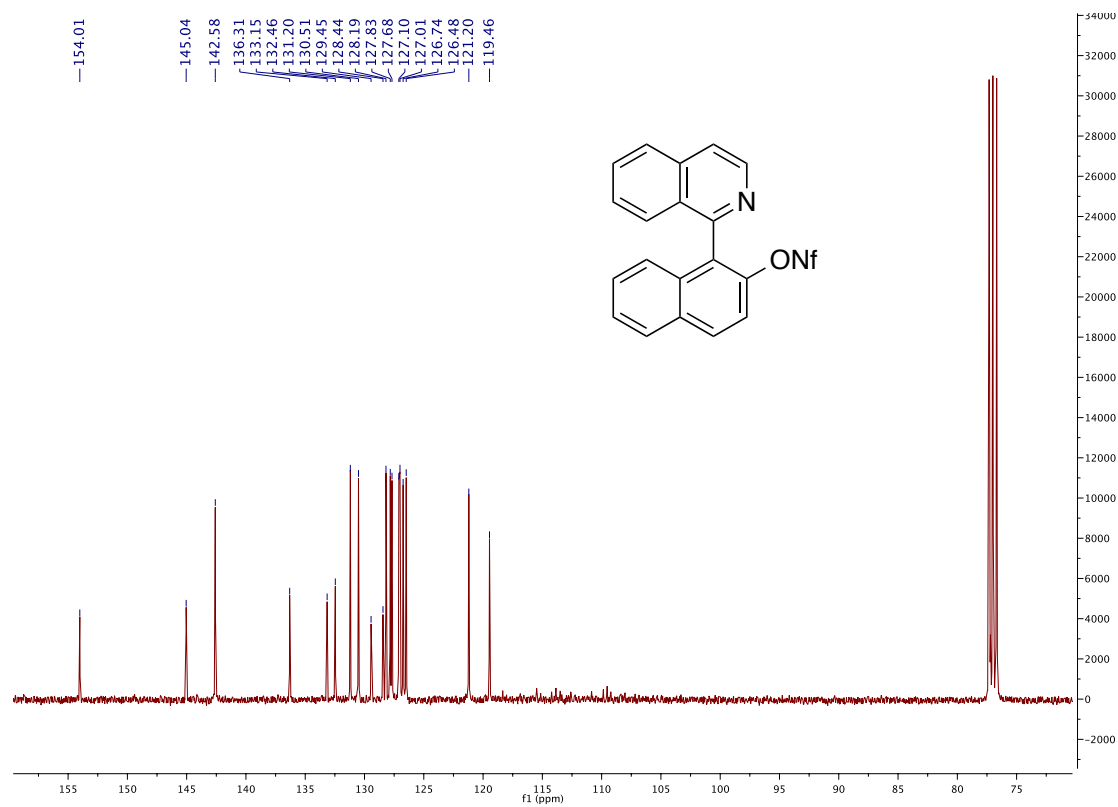



### $^1\text{H}$ NMR (400 MHz, $\text{CDCl}_3$ ) of **1E**

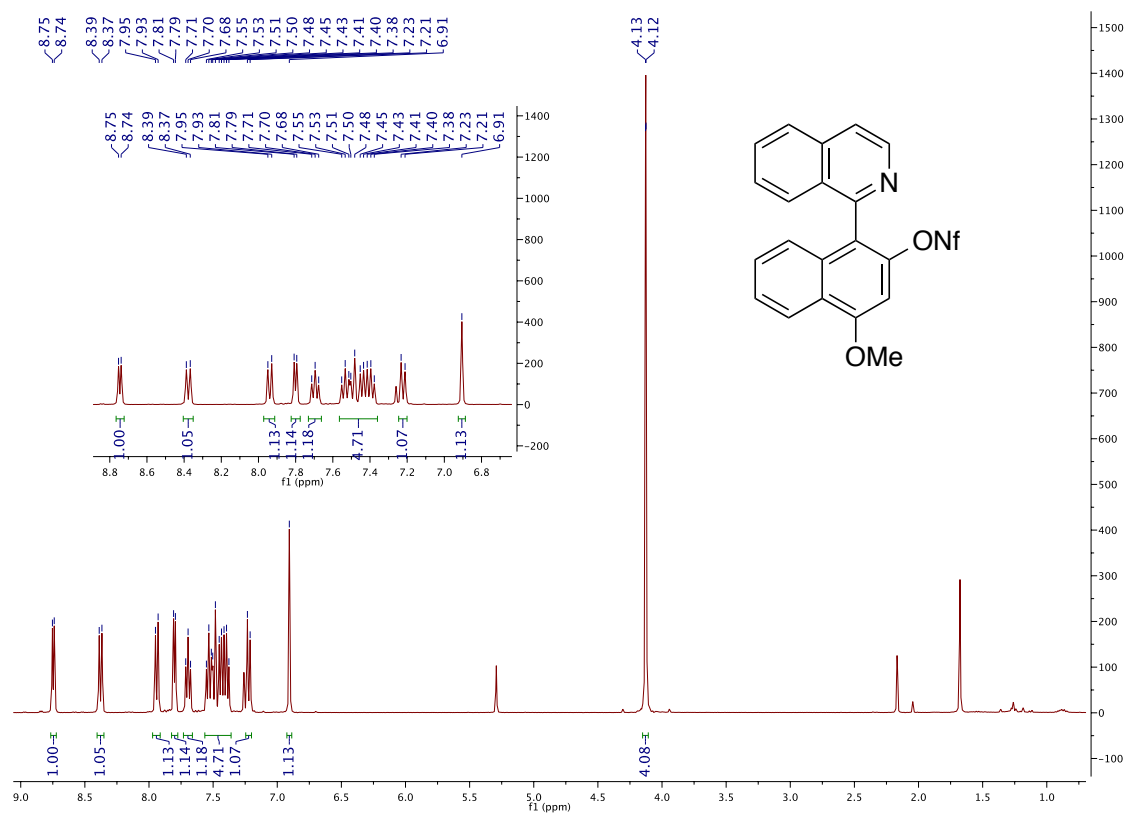

### $^{13}\text{C}$ NMR (100 MHz, $\text{CDCl}_3$ ) of **1E**

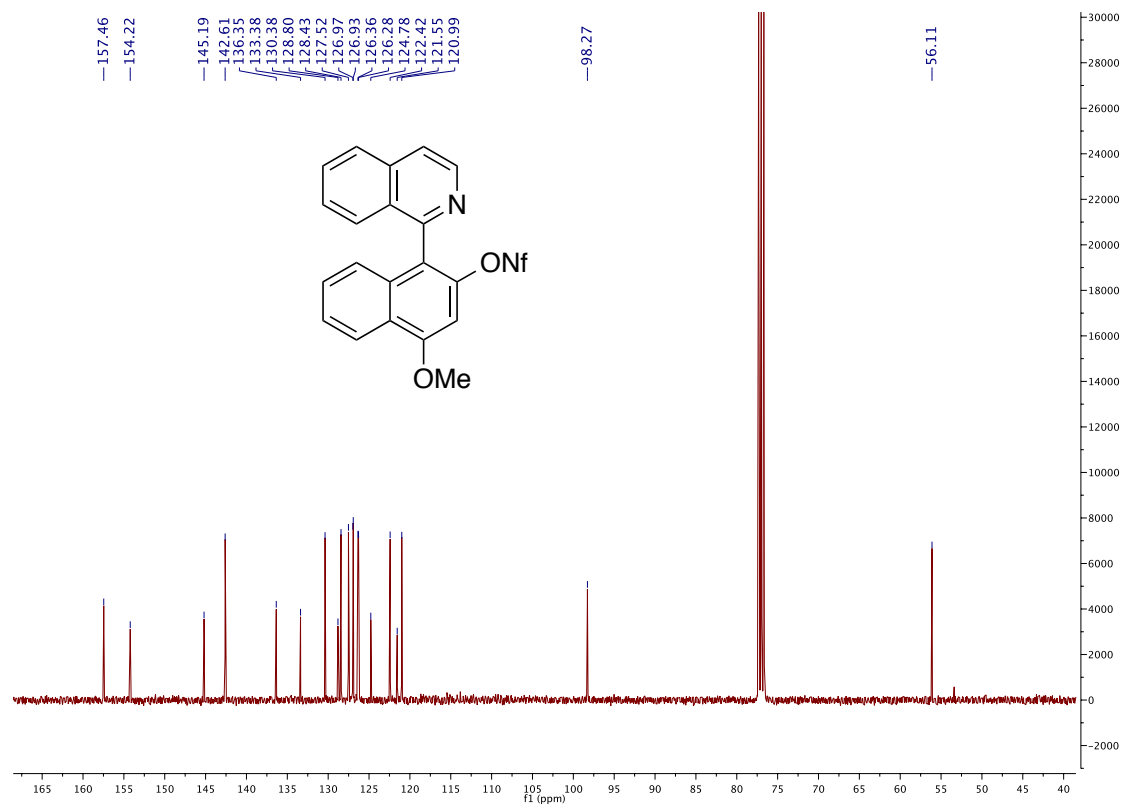

# <sup>1</sup>H NMR (400 MHz, CDCl<sub>3</sub>) of 3Aa

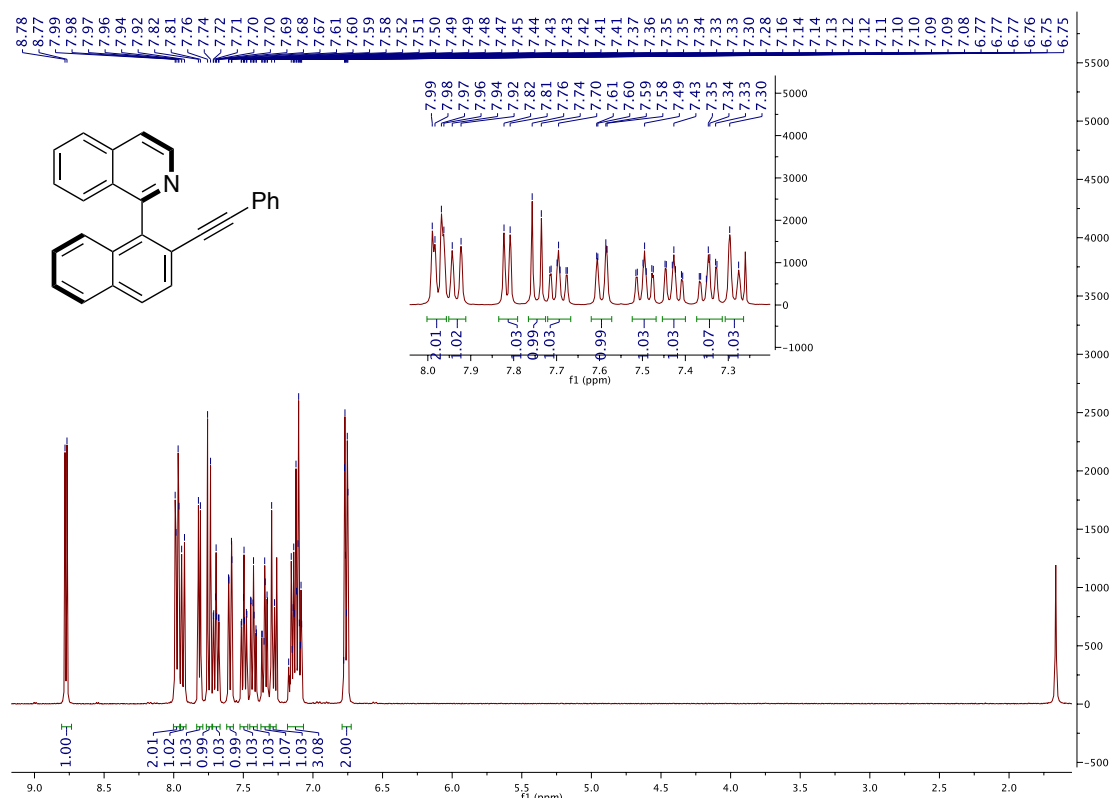

# <sup>13</sup>C NMR (100 MHz, CDCl<sub>3</sub>) of 3Aa

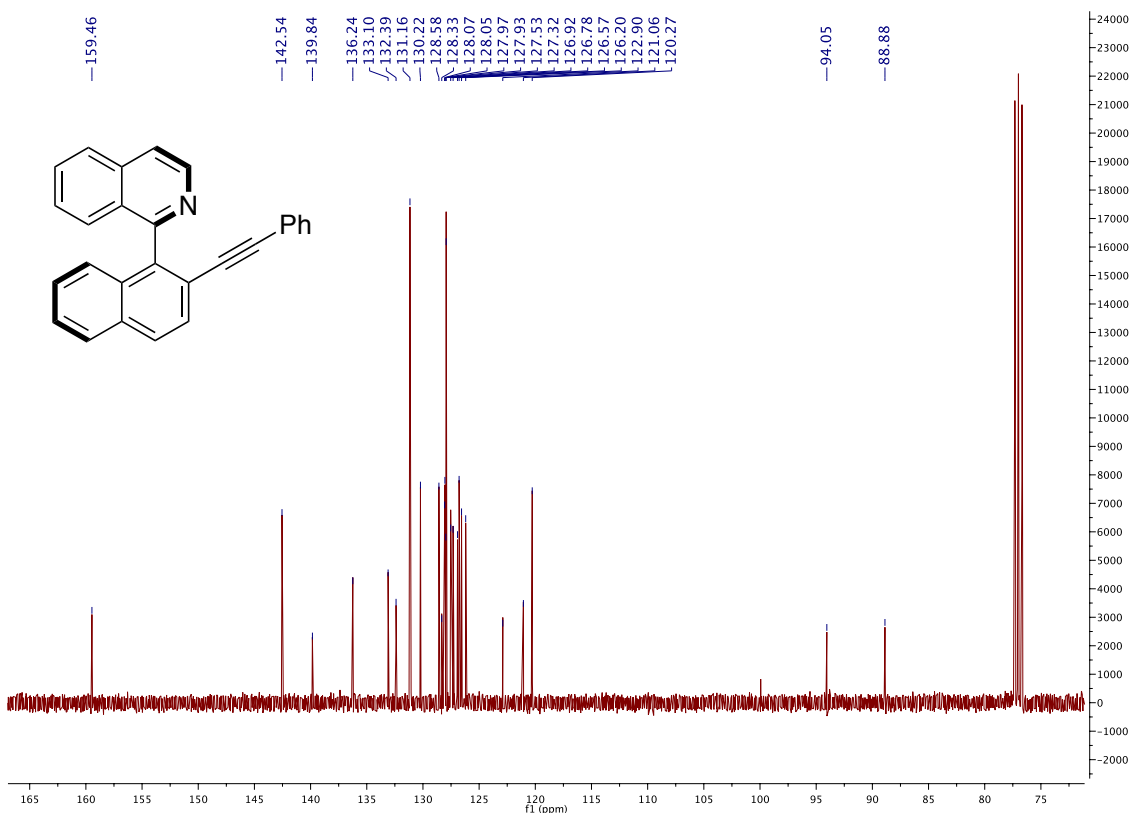

# <sup>1</sup>H NMR (400 MHz, CDCl<sub>3</sub>) of 3Ab

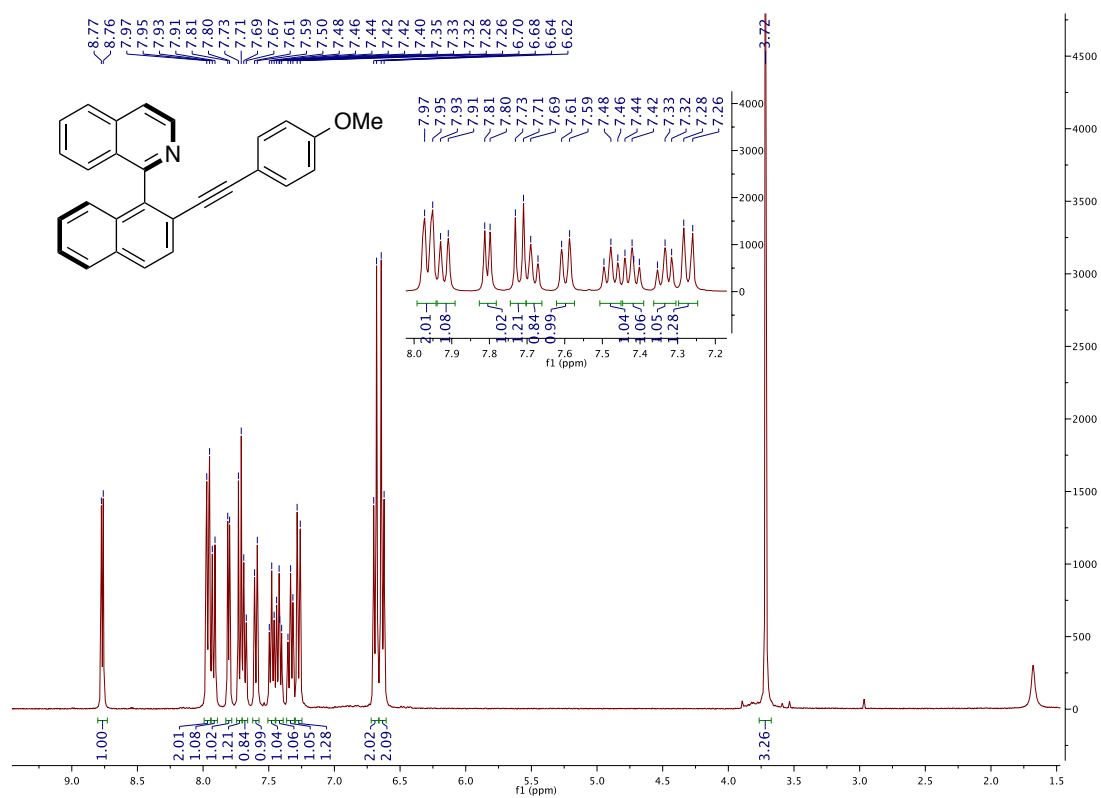

# <sup>13</sup>C NMR (100 MHz, CDCl<sub>3</sub>) of 3Ab

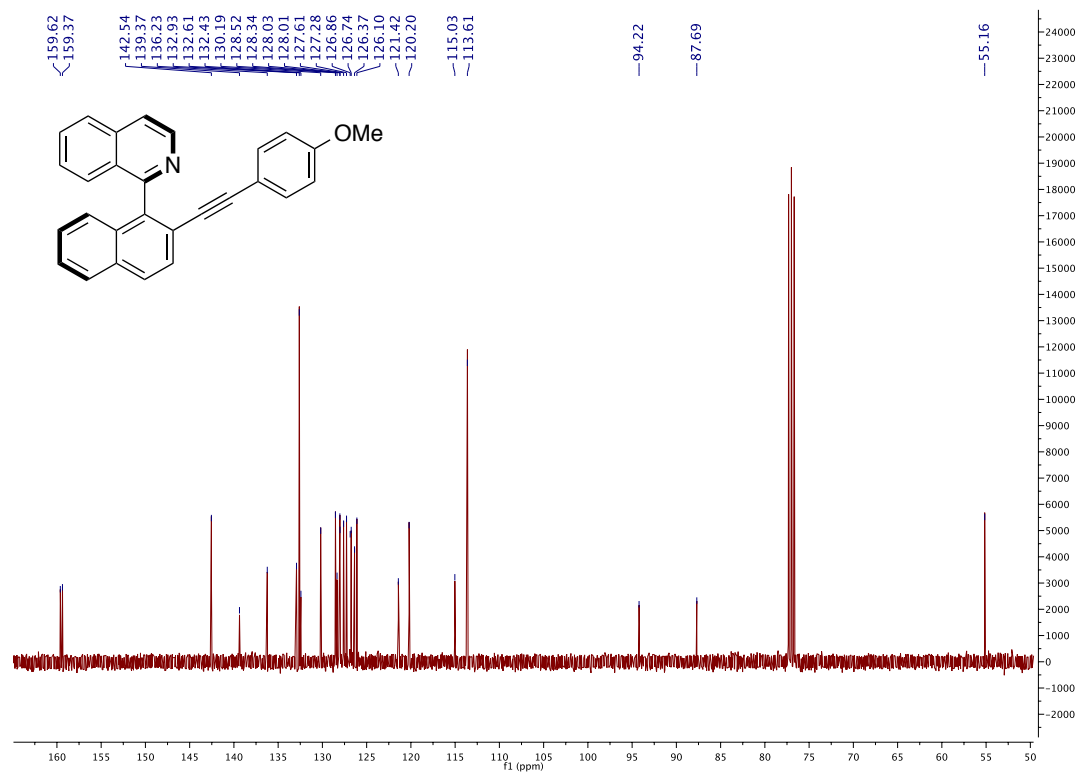

<sup>1</sup>H NMR (400 MHz, CDCl<sub>3</sub>) of 3Ac

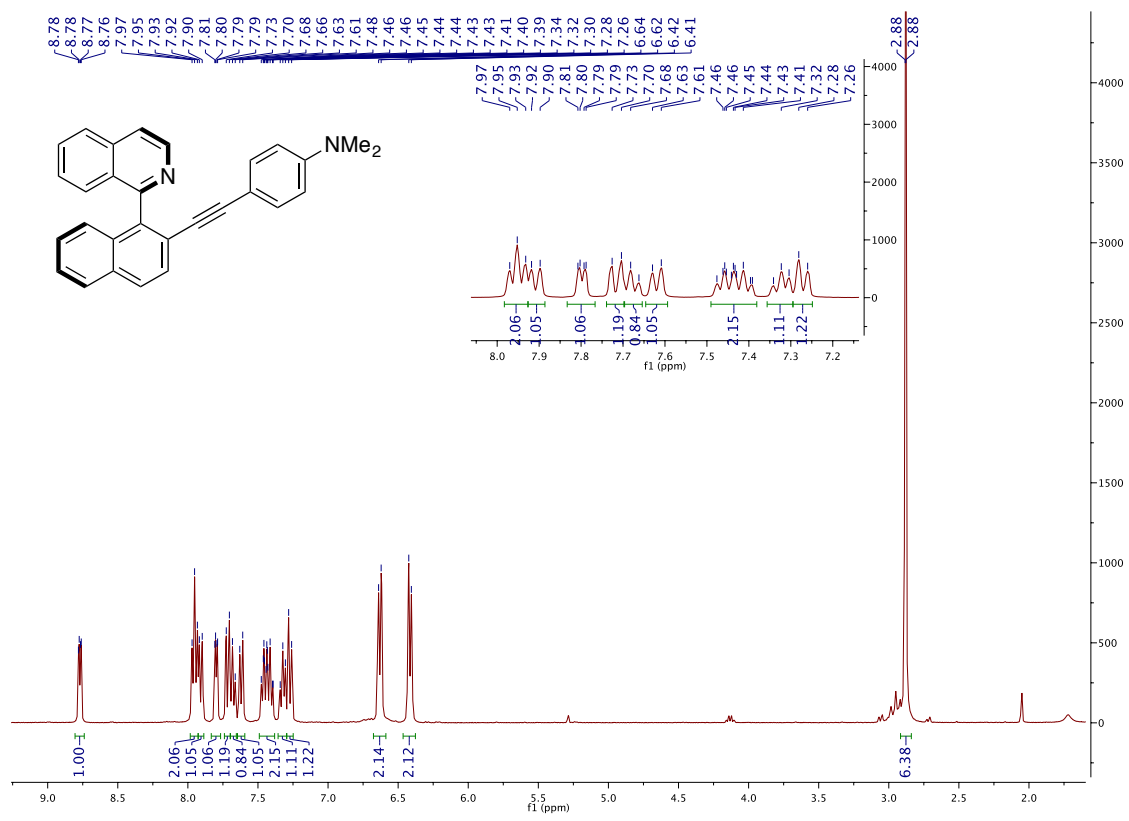

<sup>13</sup>C NMR (100 MHz, CDCl<sub>3</sub>) of 3Ac

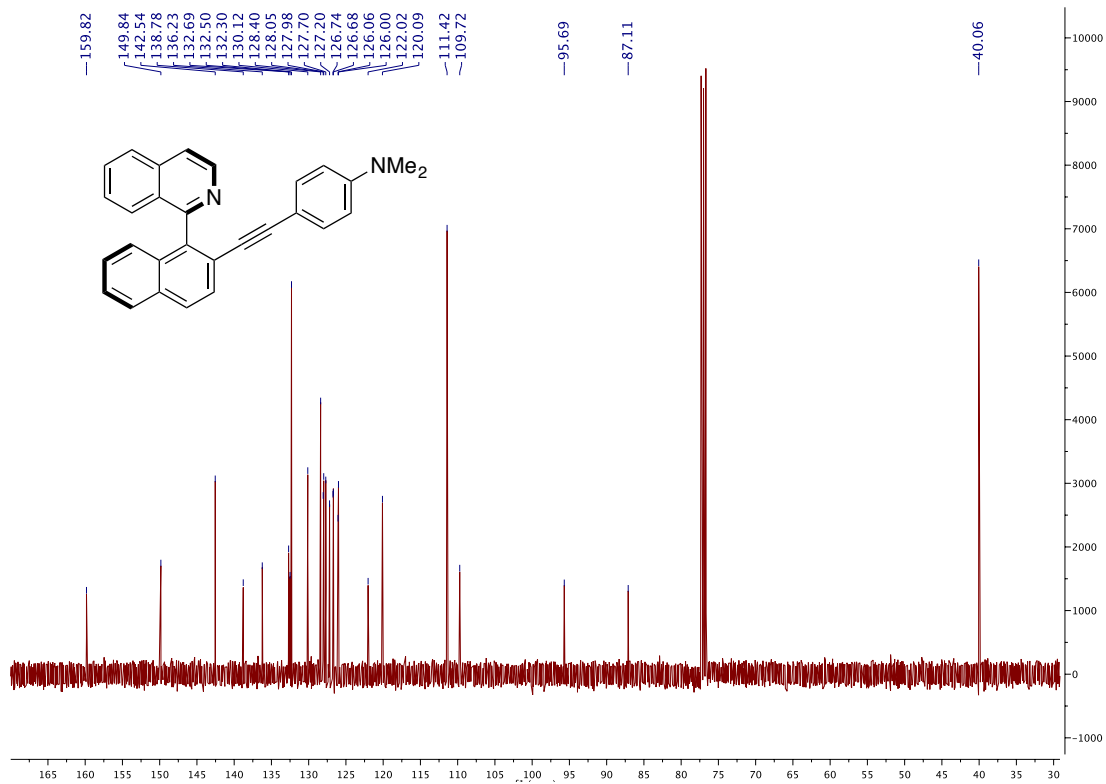

### <sup>1</sup>H NMR (400 MHz, CDCl<sub>3</sub>) of **3Ad**

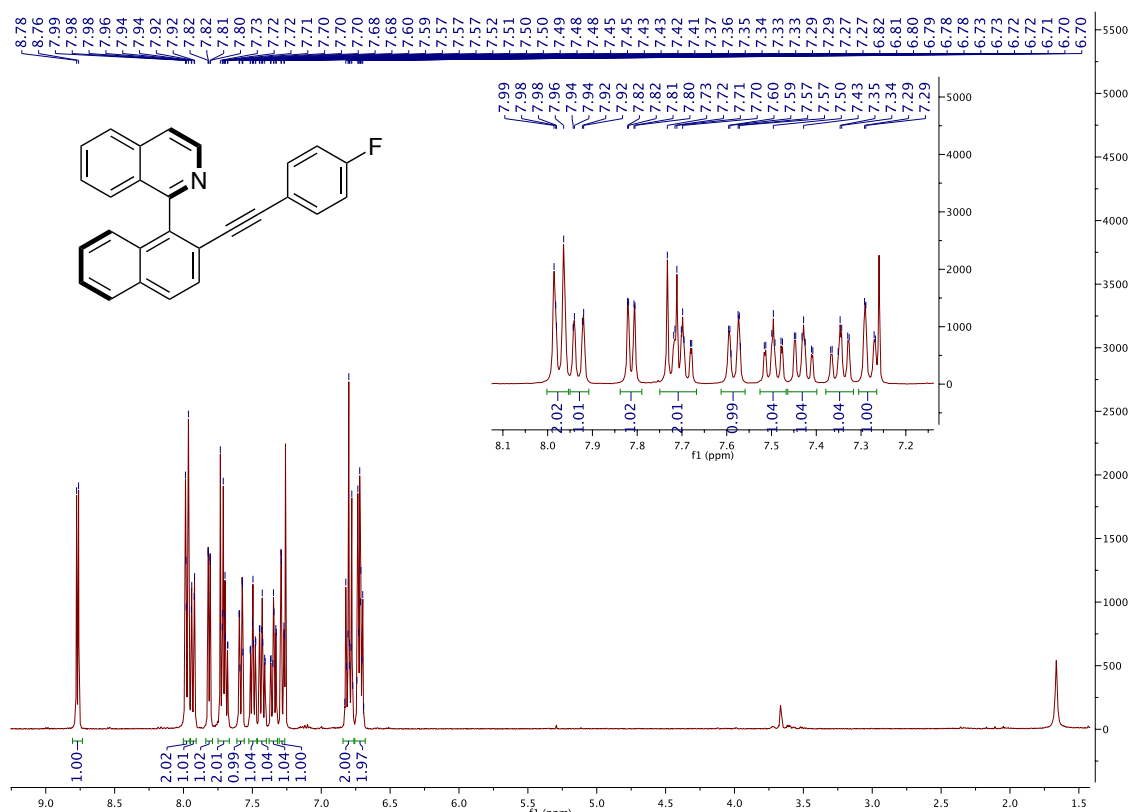

### <sup>13</sup>C NMR (100 MHz, CDCl<sub>3</sub>) of **3Ad**

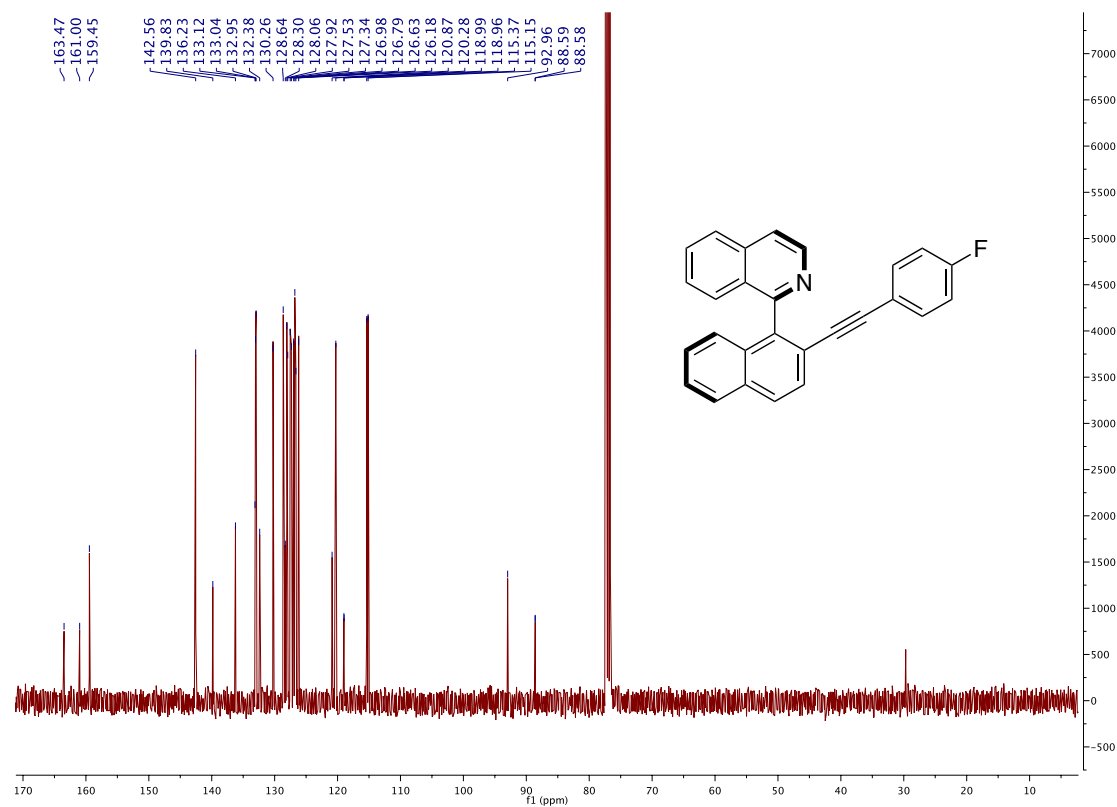

$^{19}\text{F}$  NMR (377 MHz,  $\text{CDCl}_3$ ) of **3Ad**

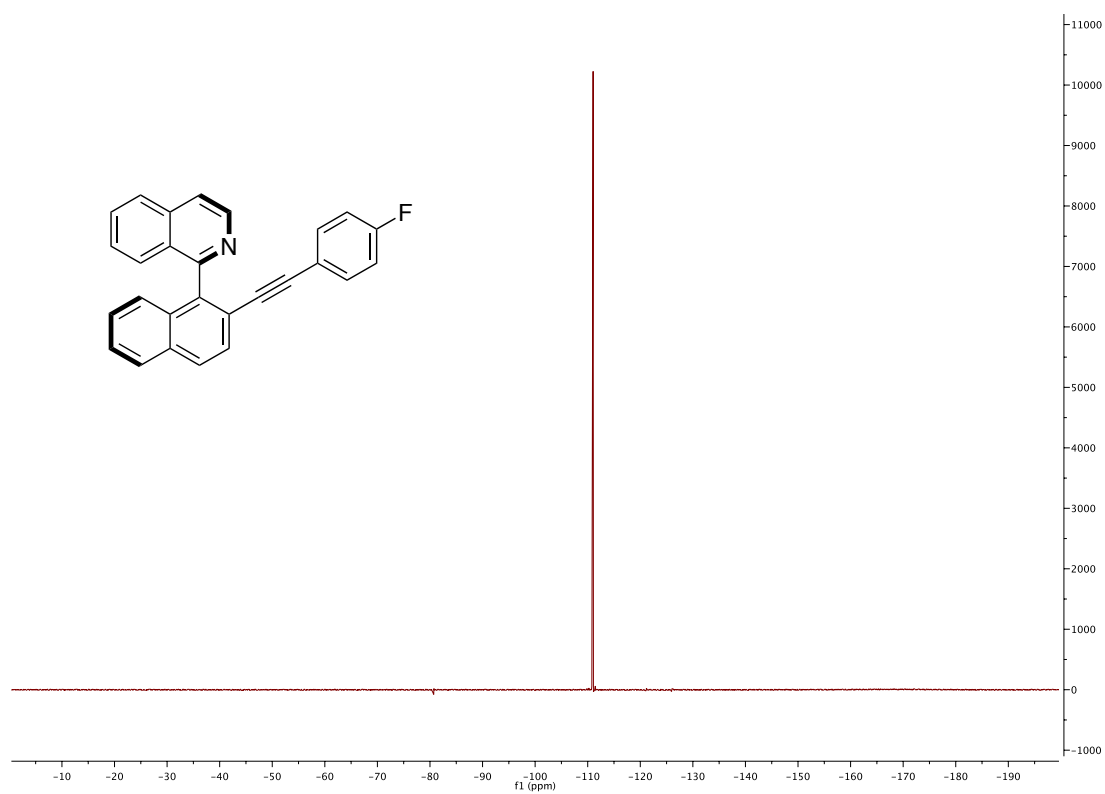

### $^1\text{H}$ NMR (400 MHz, $\text{CDCl}_3$ ) of **3Ae**

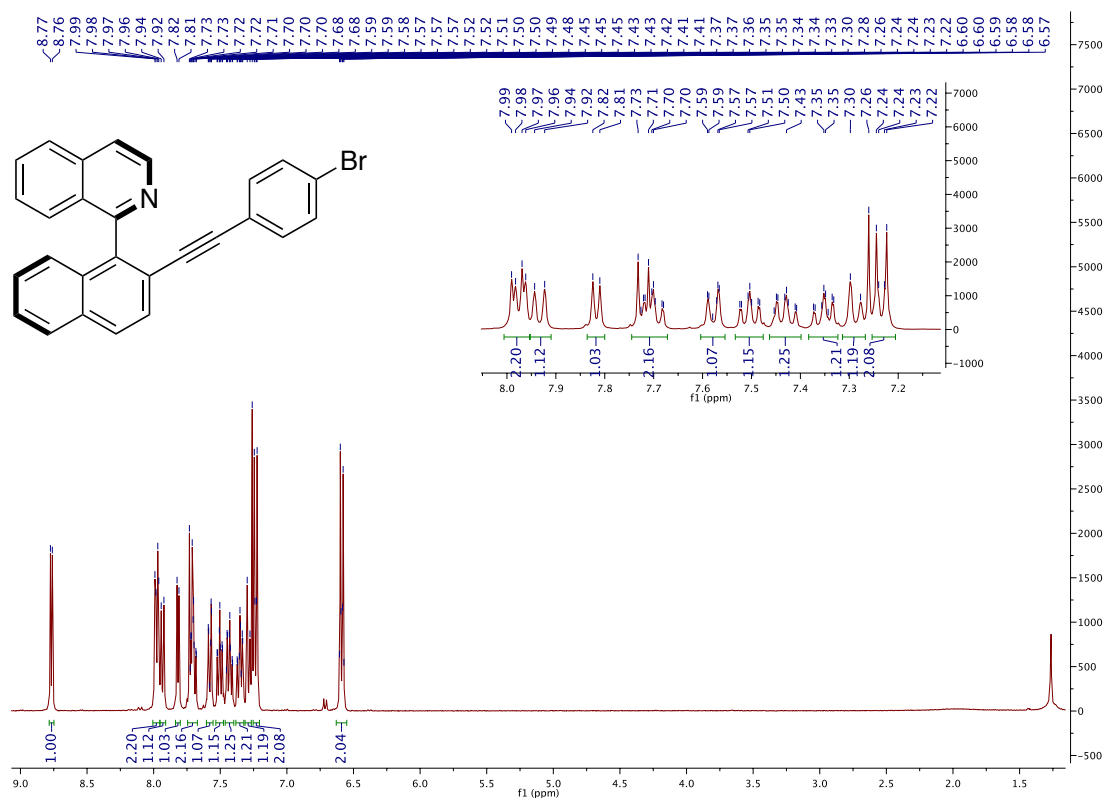

### $^{13}\text{C}$ NMR (100 MHz, $\text{CDCl}_3$ ) of **3Ae**

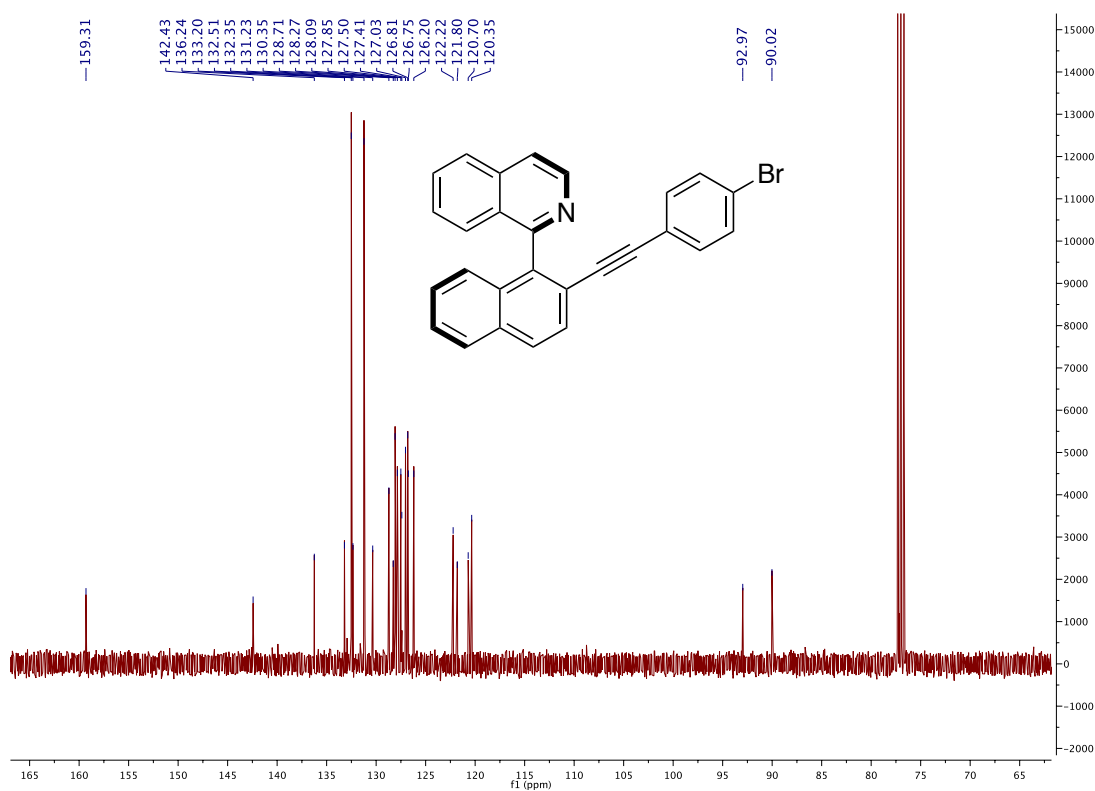

<sup>1</sup>H NMR (400 MHz, CDCl<sub>3</sub>) of **3Af**

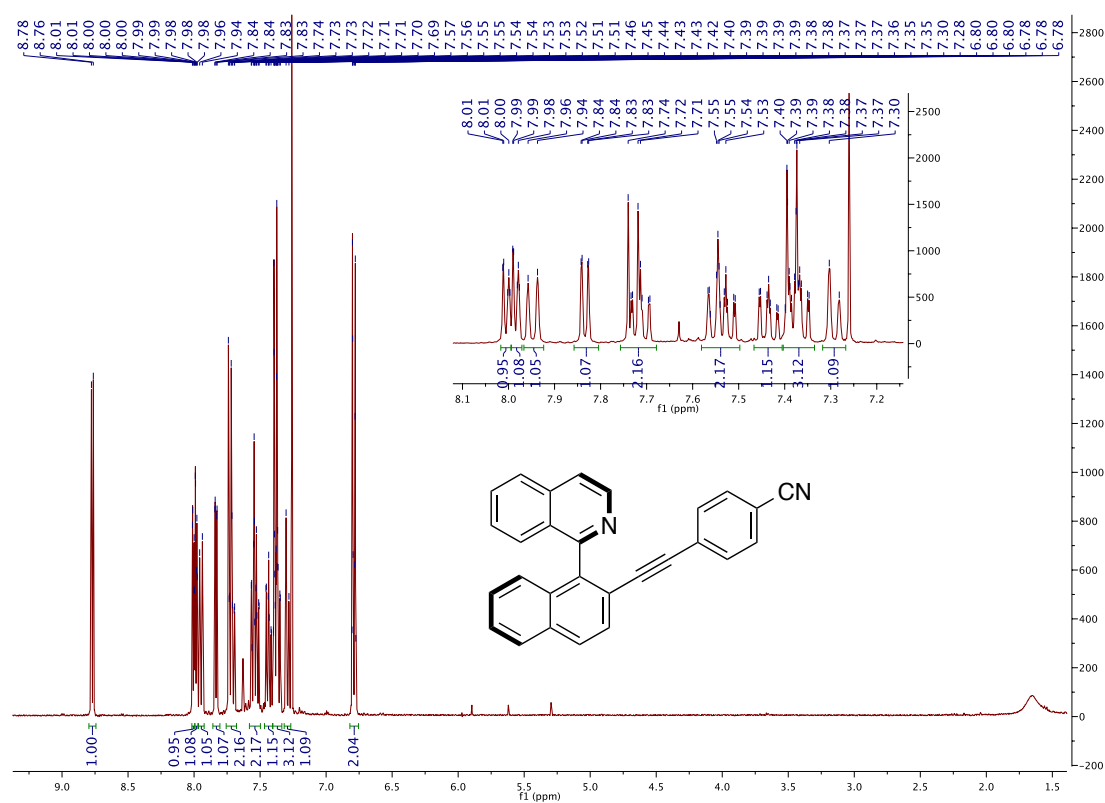

<sup>13</sup>C NMR (100 MHz, CDCl<sub>3</sub>) of **3Af**

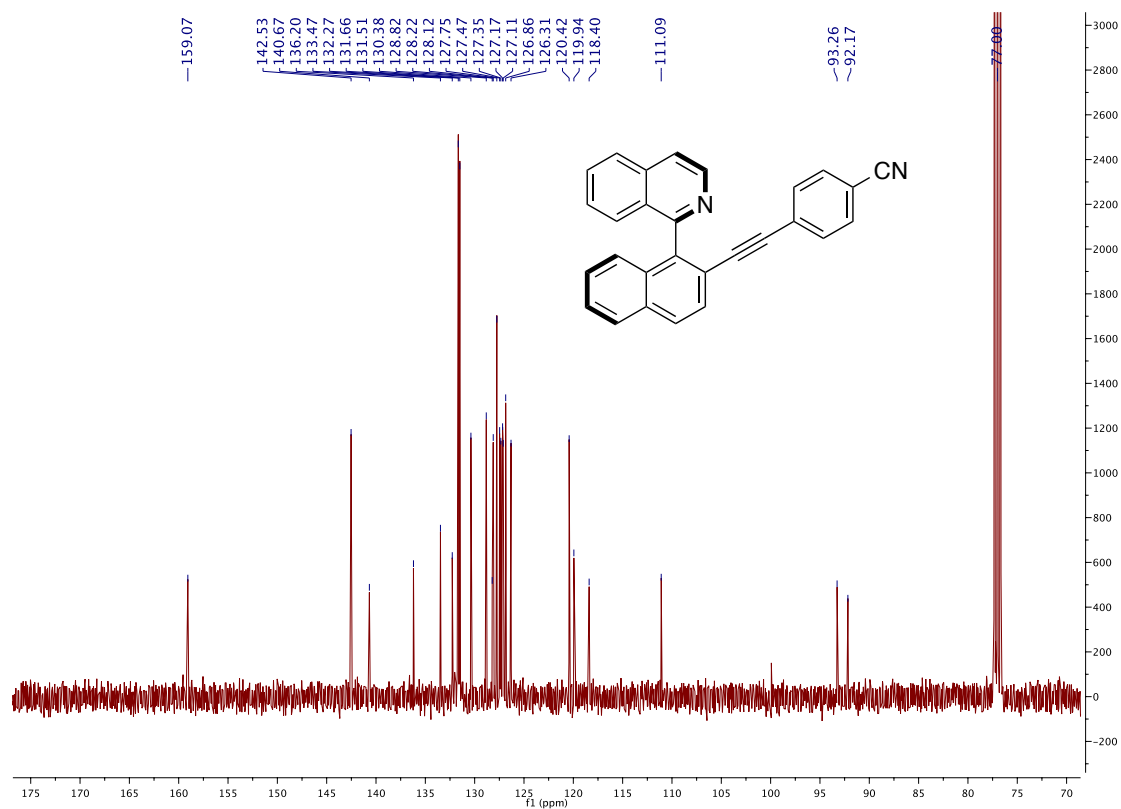



<sup>1</sup>H NMR (400 MHz, CDCl<sub>3</sub>) of **3Ag**

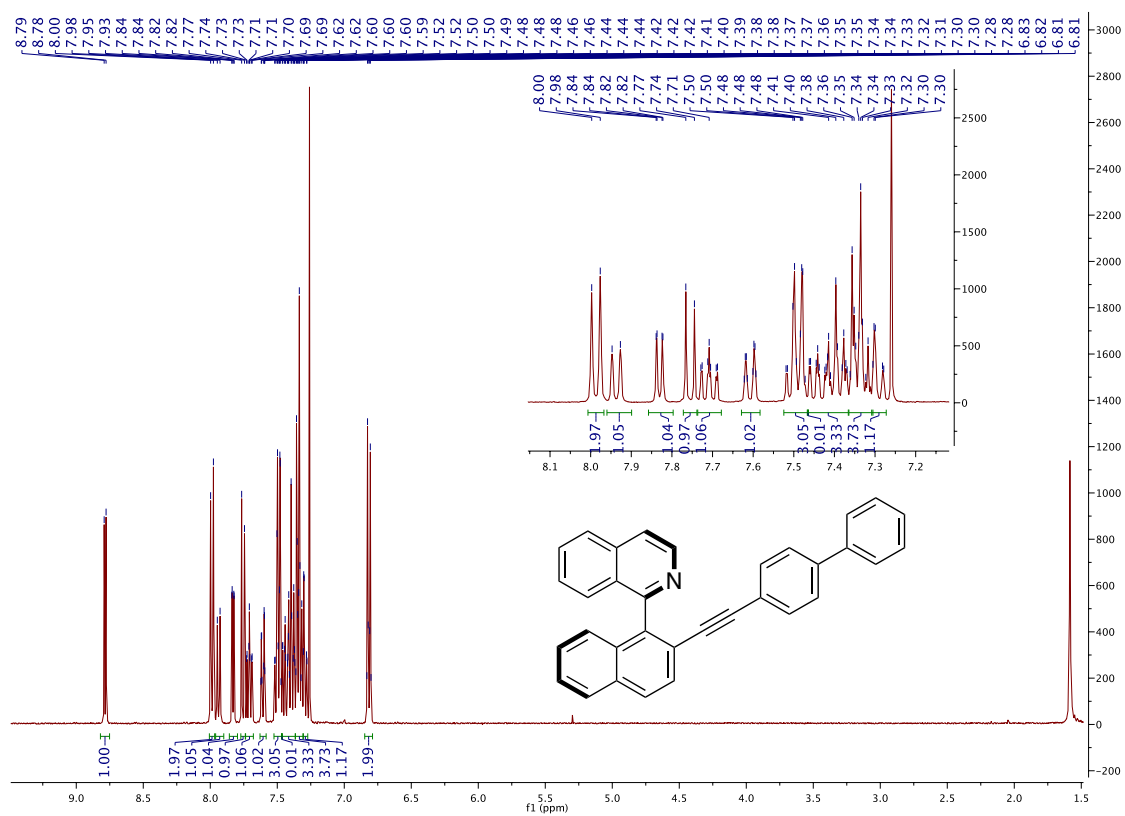

<sup>13</sup>C NMR (100 MHz, CDCl<sub>3</sub>) of **3Ag**

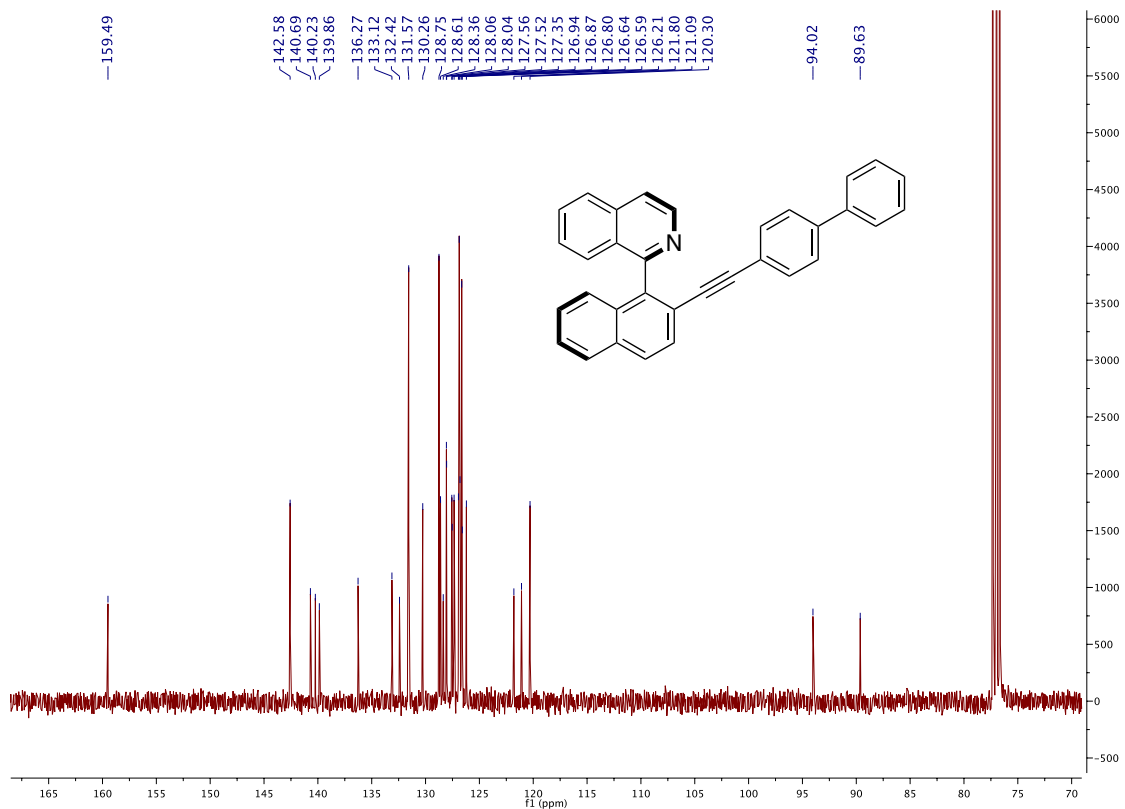

### $^1\text{H}$ NMR (400 MHz, $\text{CDCl}_3$ ) of **3Ah**

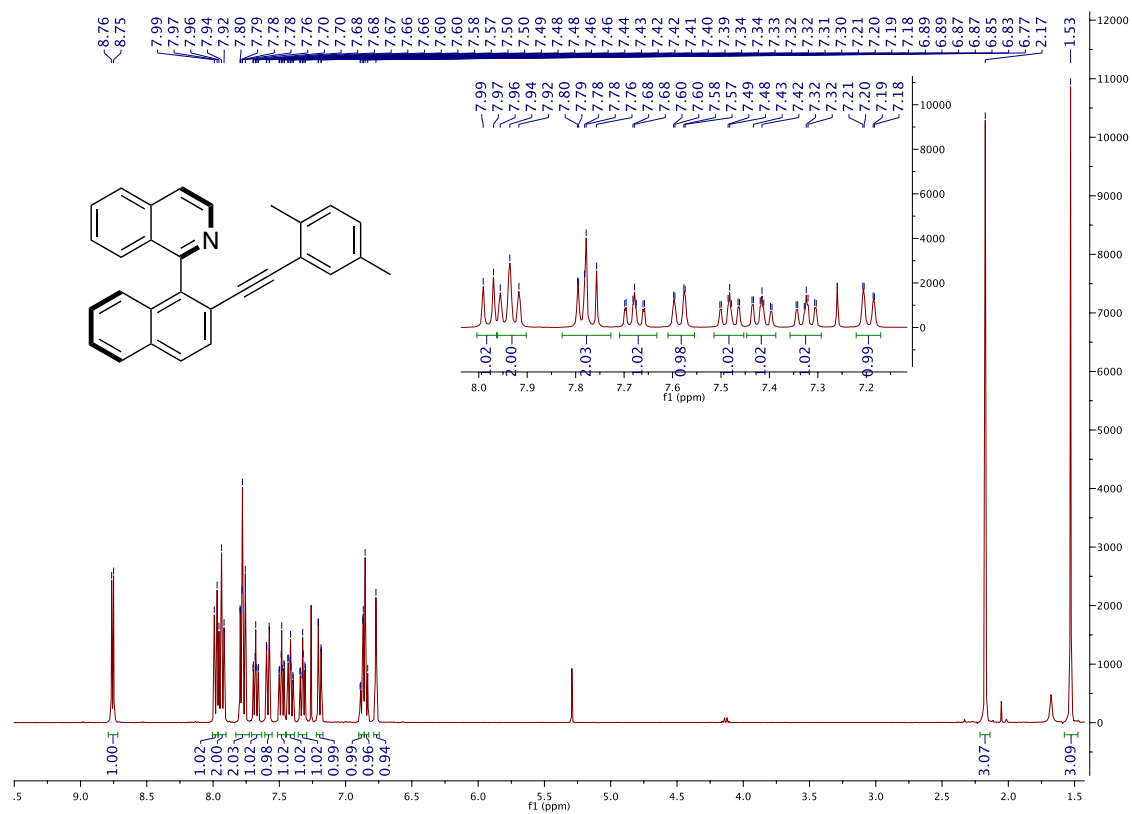

### $^{13}\text{C}$ NMR (100 MHz, $\text{CDCl}_3$ ) of **3Ah**

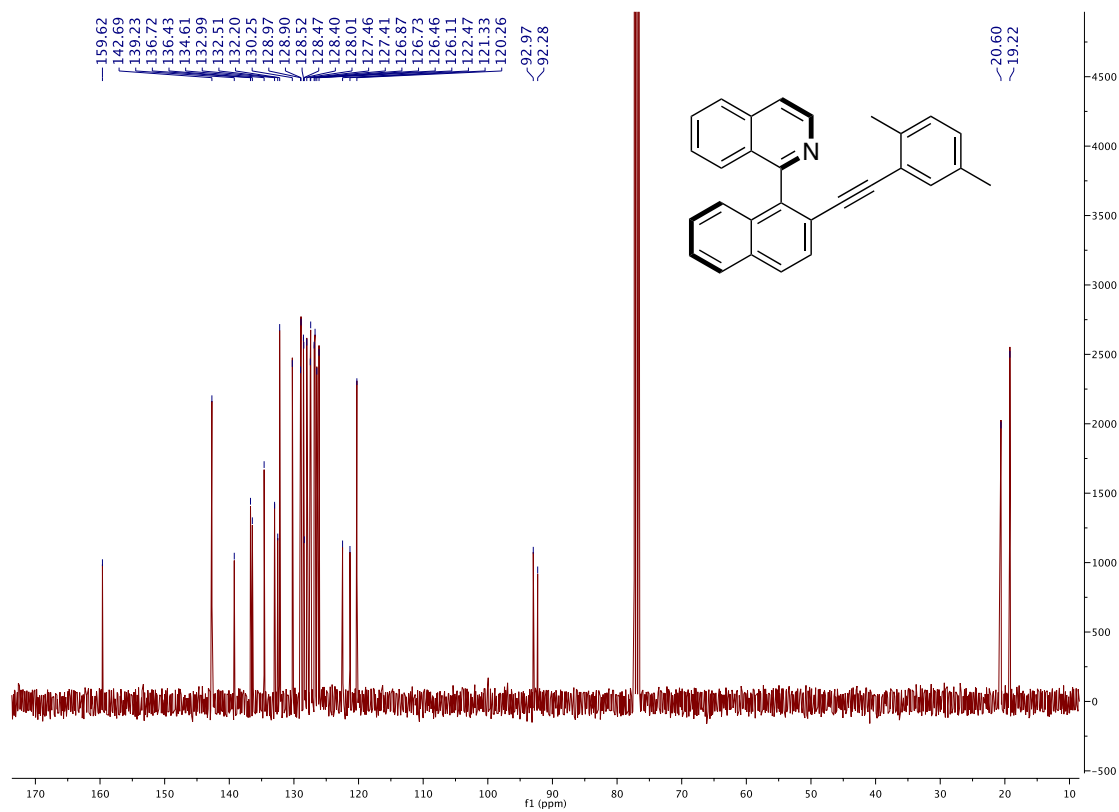

### $^1\text{H}$ NMR (400 MHz, $\text{CDCl}_3$ ) of **3Ai**

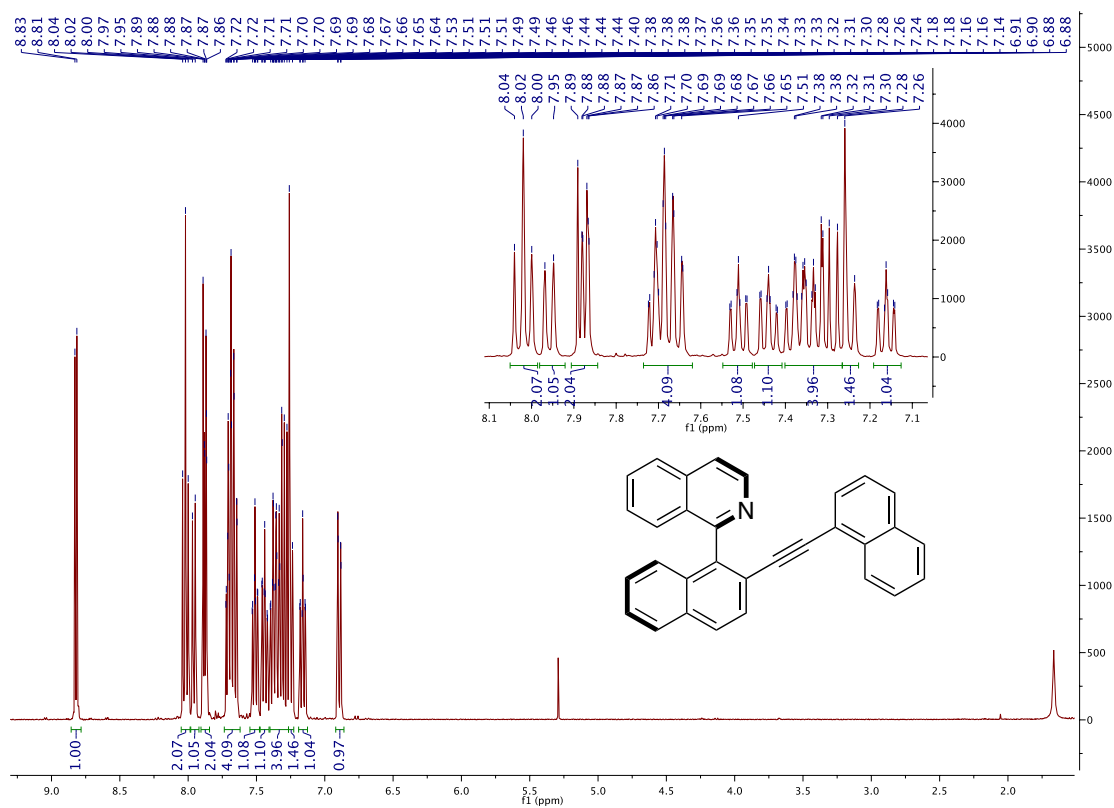

### $^{13}\text{C}$ NMR (100 MHz, $\text{CDCl}_3$ ) of **3Ai**

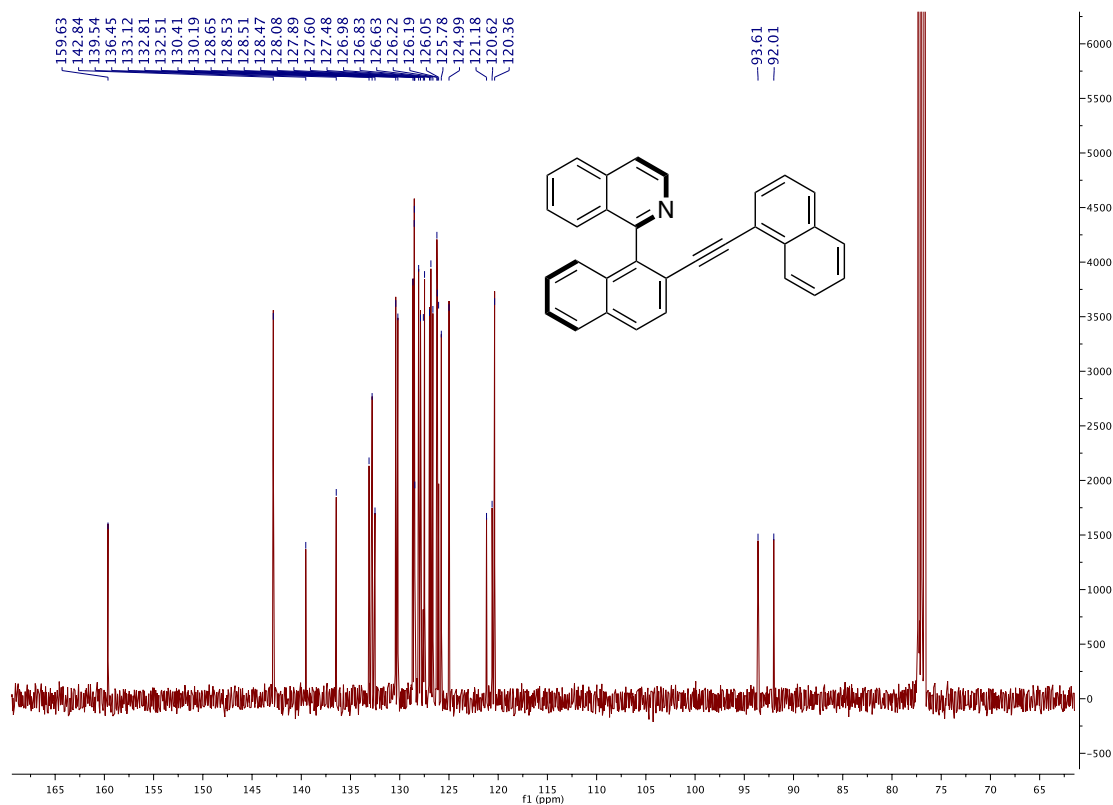

<sup>1</sup>H NMR (400 MHz, CDCl<sub>3</sub>) of **3Aj**

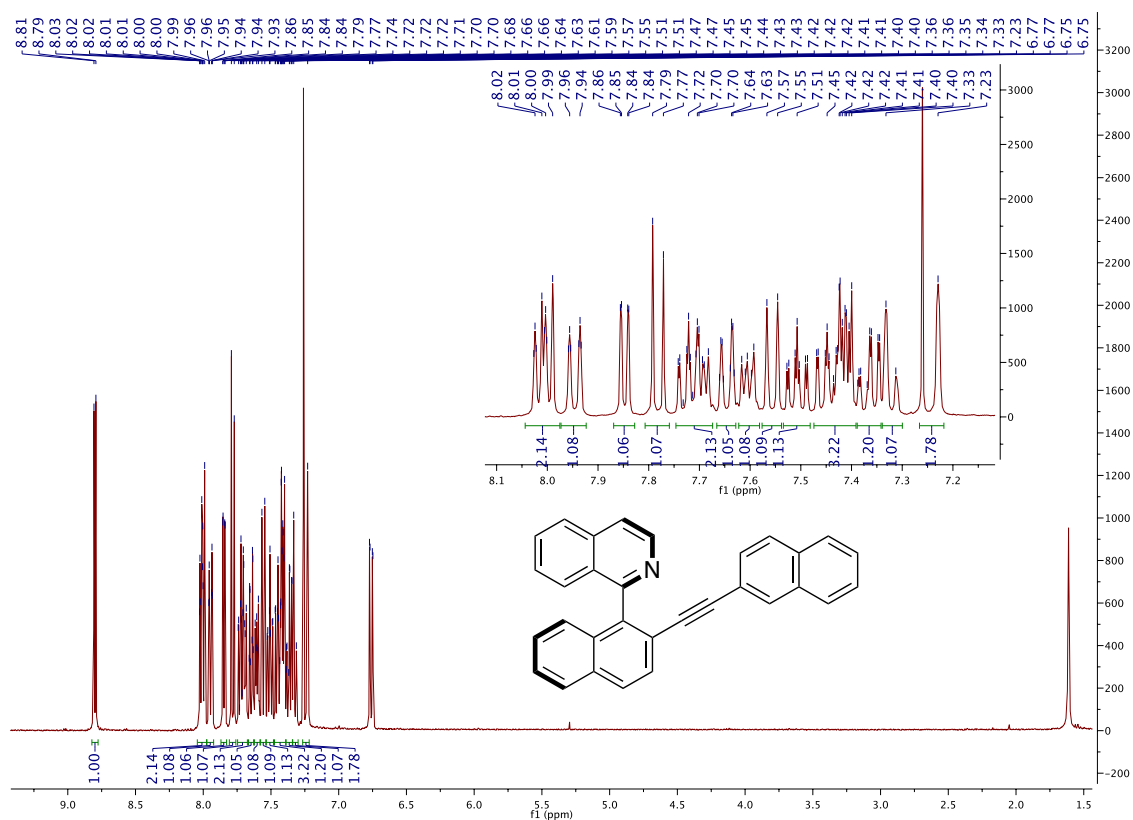

<sup>13</sup>C NMR (100 MHz, CDCl<sub>3</sub>) of **3Aj**

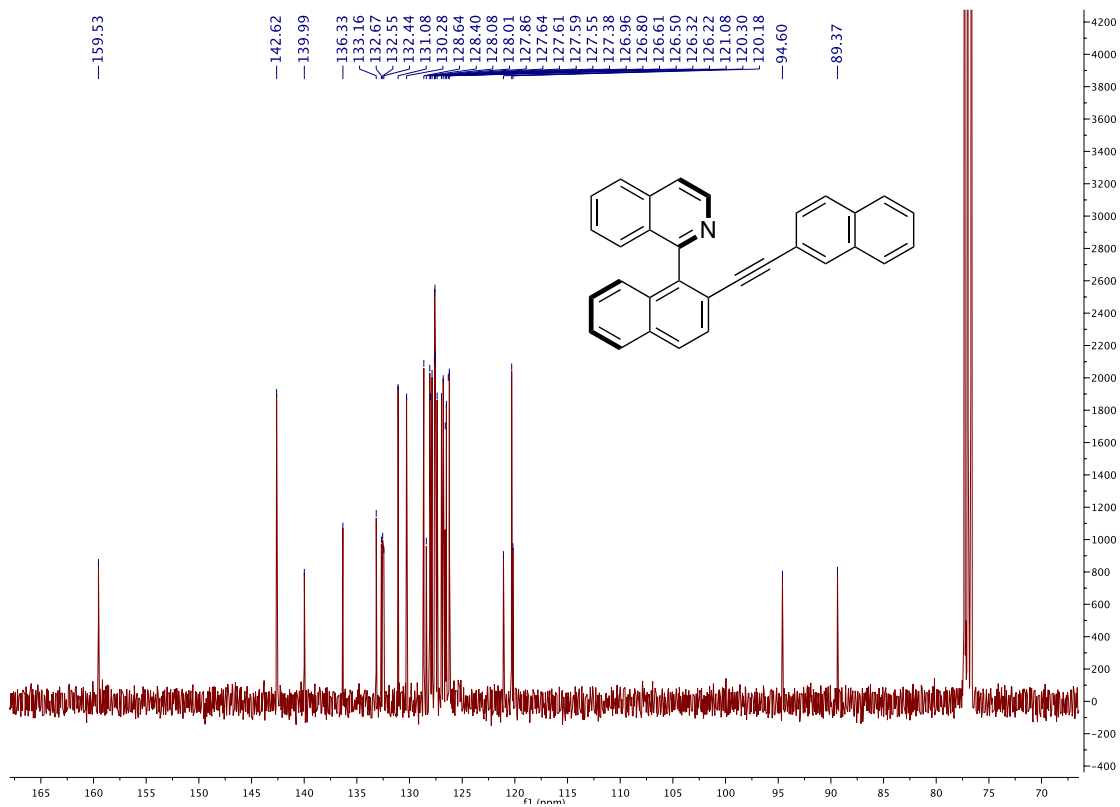

# <sup>1</sup>H NMR (400 MHz, CDCl<sub>3</sub>) of 3Ak

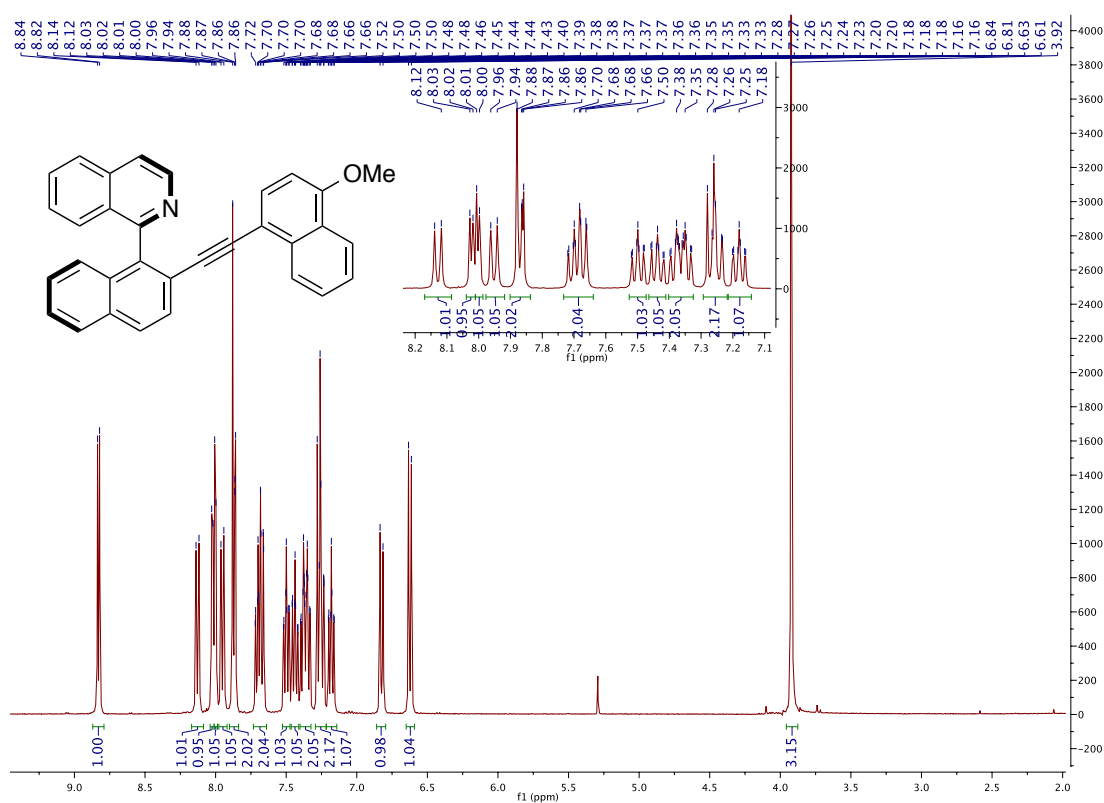

# <sup>13</sup>C NMR (100 MHz, CDCl<sub>3</sub>) of 3Ak

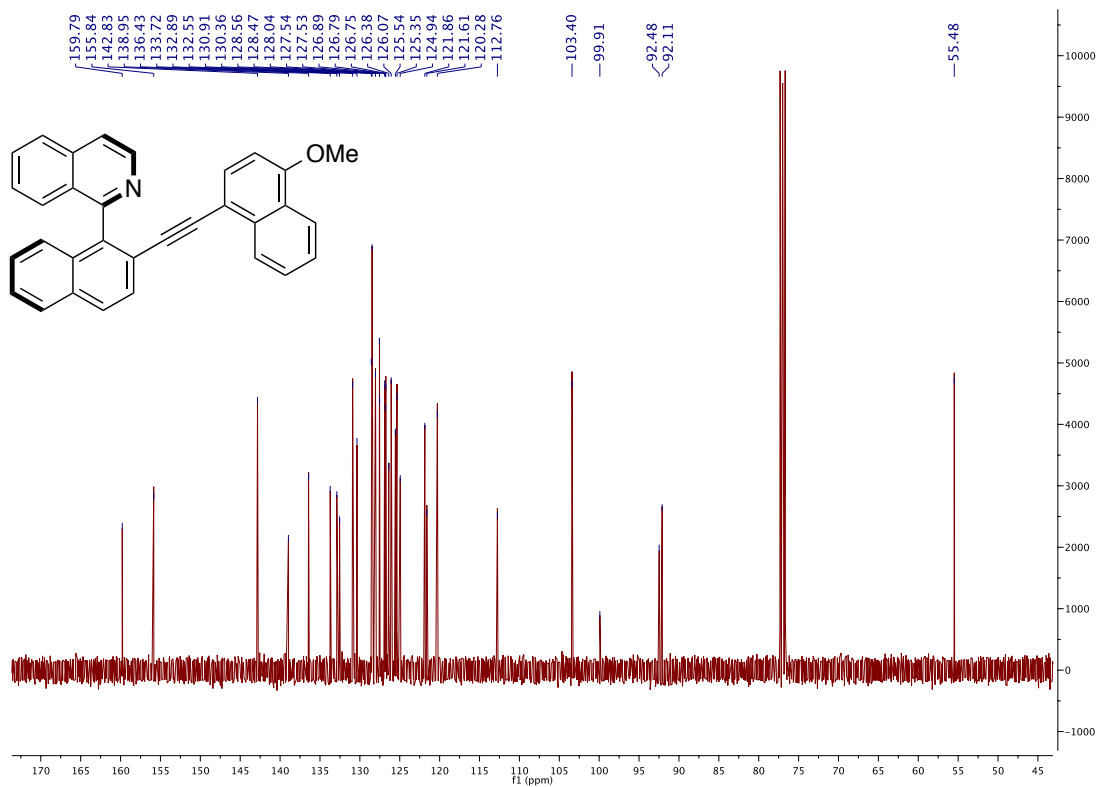

$^1\text{H}$  NMR (400 MHz,  $\text{CDCl}_3$ ) of **3AI**

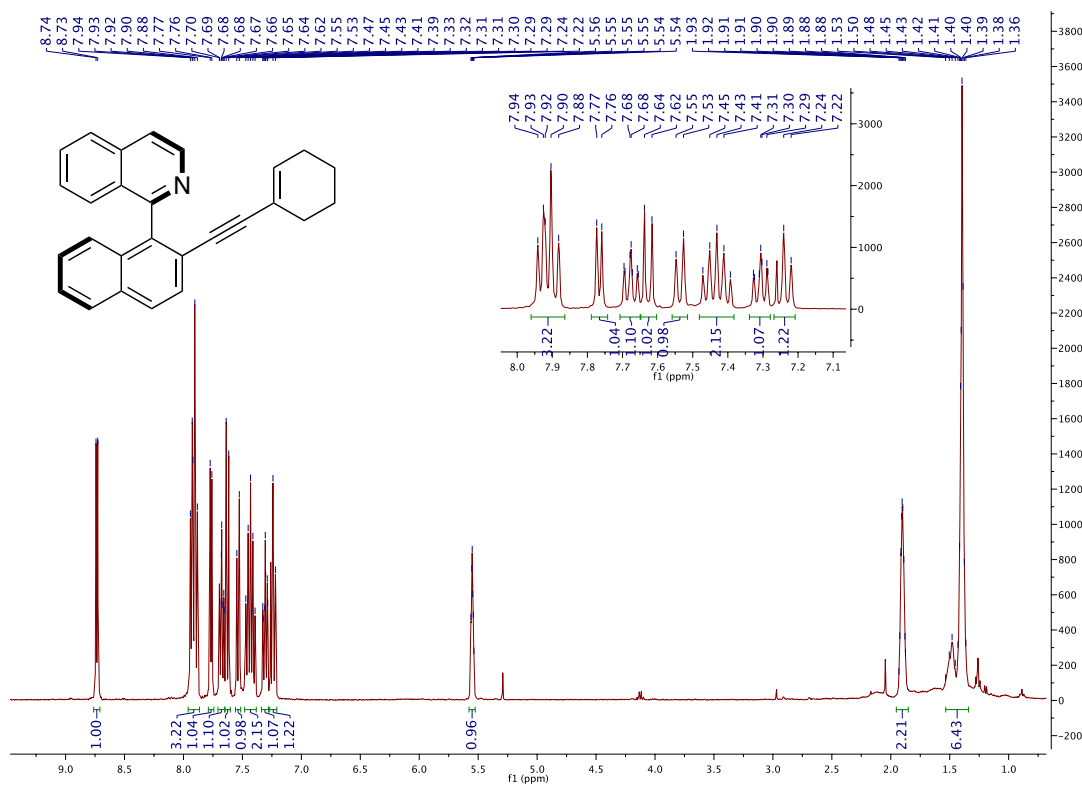

$^{13}\text{C}$  NMR (100 MHz,  $\text{CDCl}_3$ ) of **3AI**

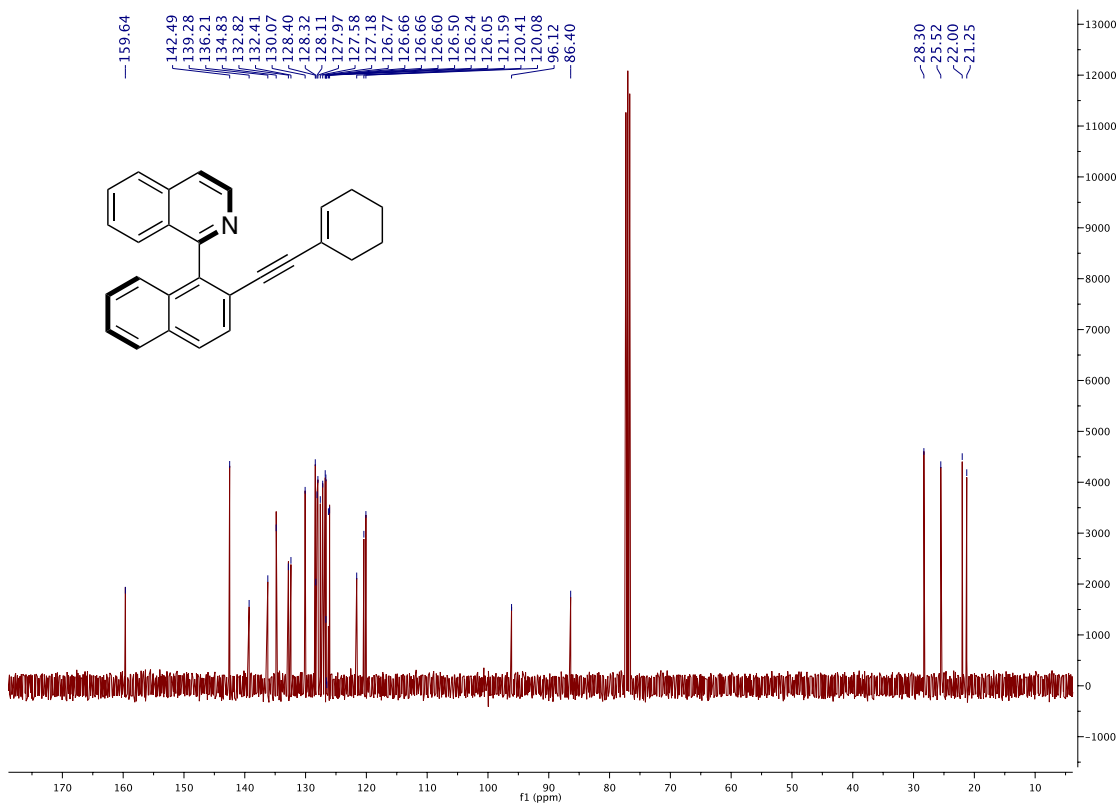

<sup>1</sup>H NMR (400 MHz, CDCl<sub>3</sub>) of **3Am**

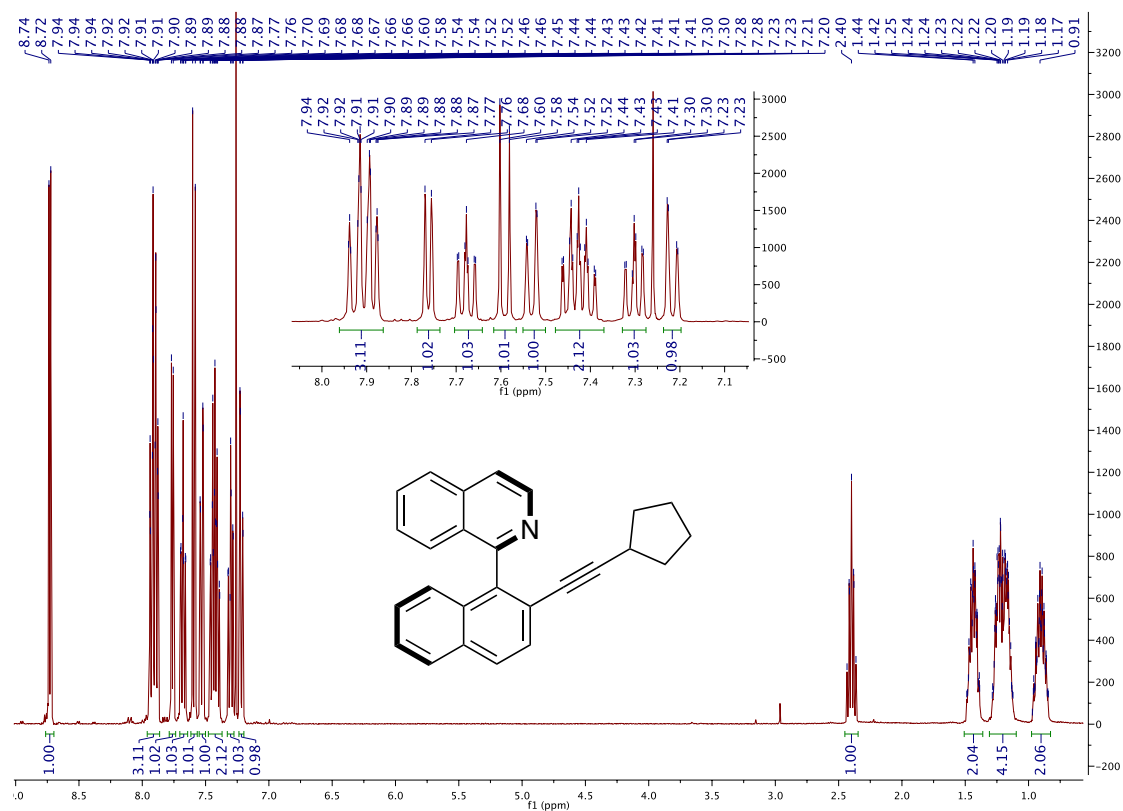

<sup>13</sup>C NMR (100 MHz, CDCl<sub>3</sub>) of **3Am**

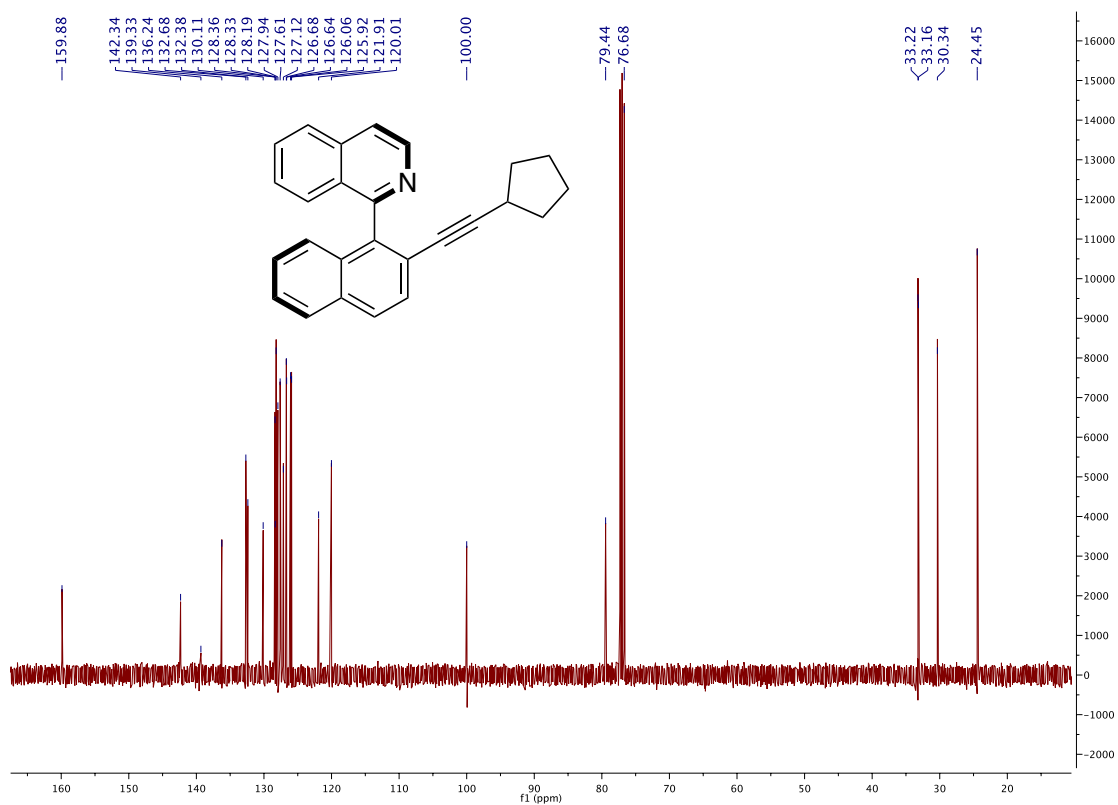

<sup>1</sup>H NMR (400 MHz, CDCl<sub>3</sub>) of **3An**

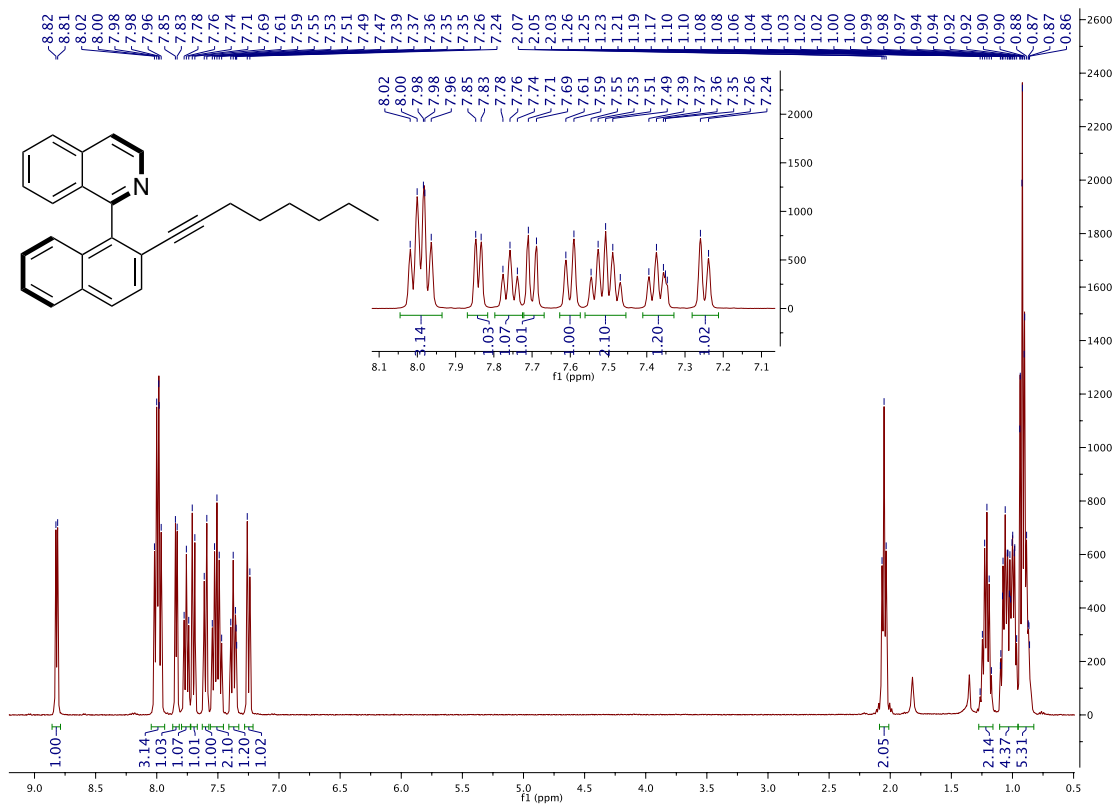

<sup>13</sup>C NMR (100 MHz, CDCl<sub>3</sub>) of **3An**

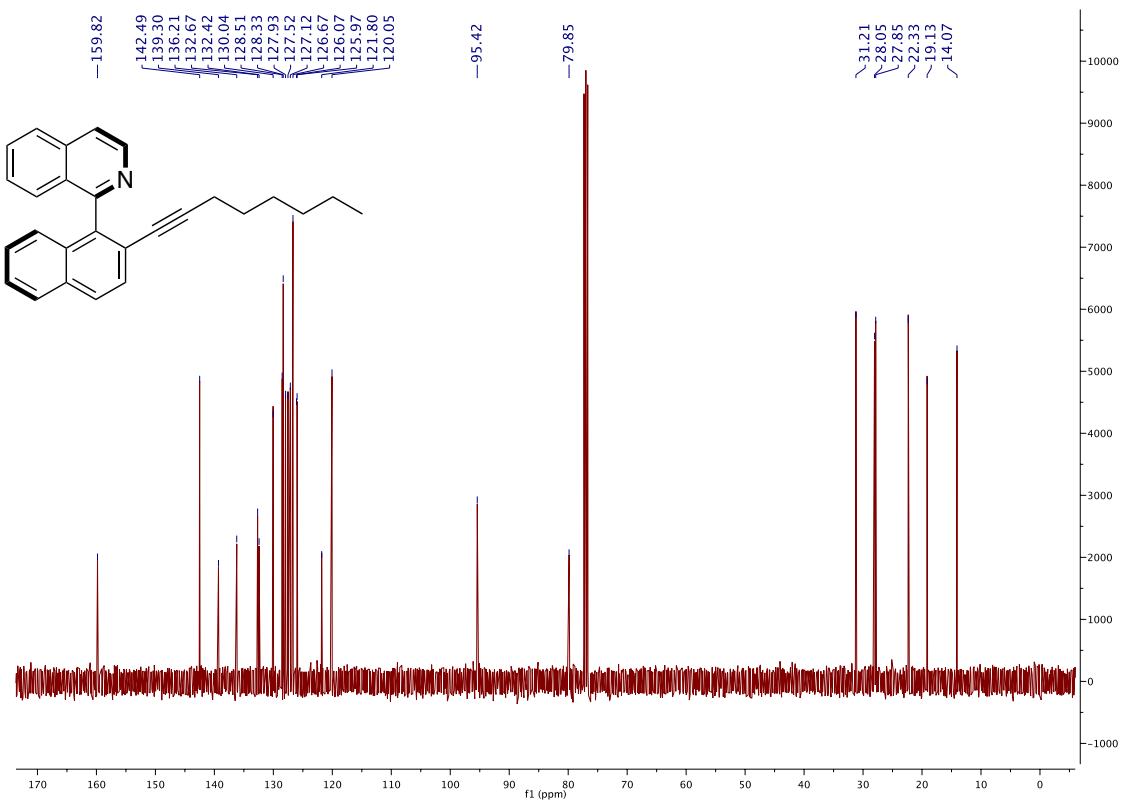



### $^1\text{H}$ NMR (400 MHz, $\text{CDCl}_3$ ) of **3Ao**

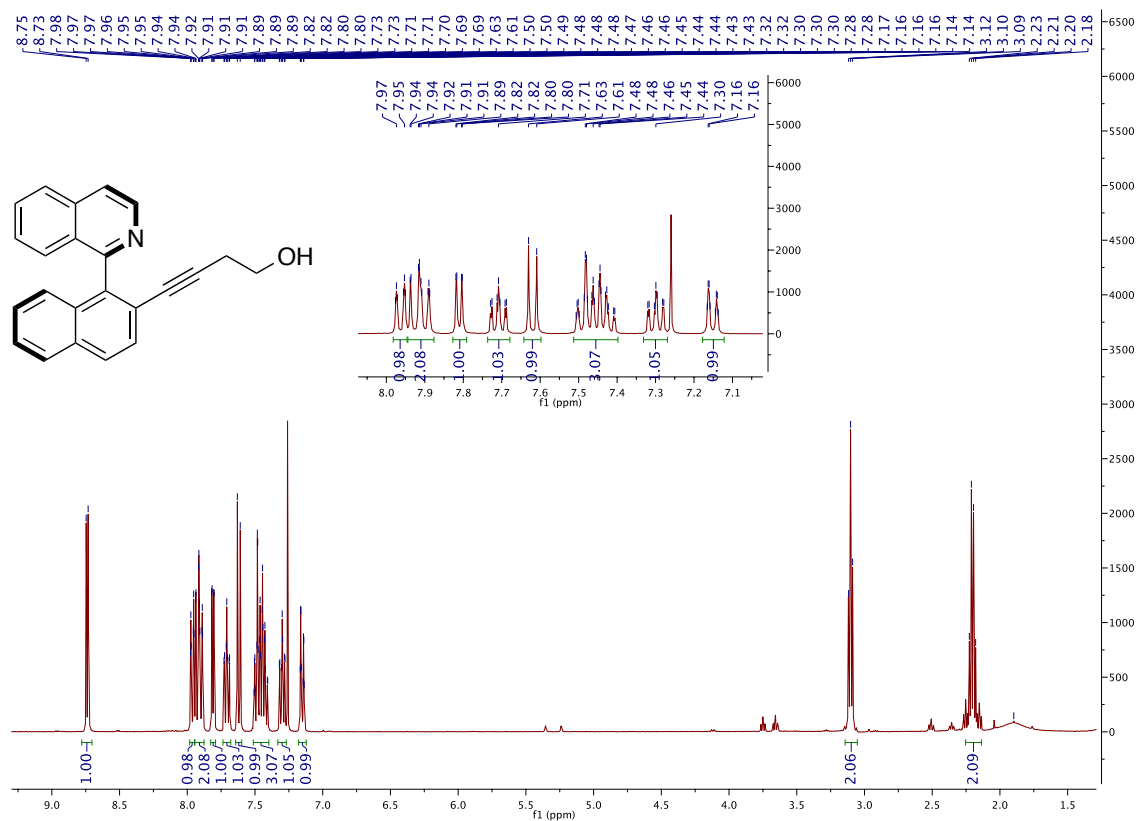

### $^{13}\text{C}$ NMR (100 MHz, $\text{CDCl}_3$ ) of **3Ao**

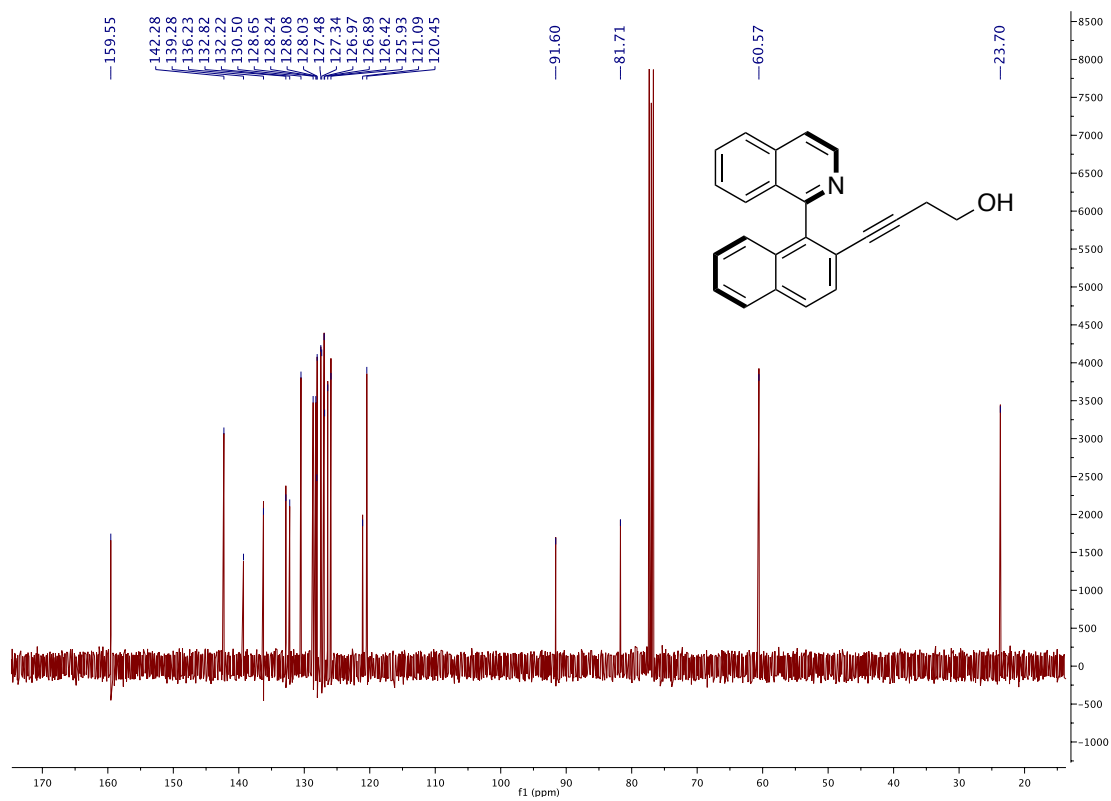

### $^1\text{H}$ NMR (400 MHz, $\text{CDCl}_3$ ) of **3Ap diast 1**

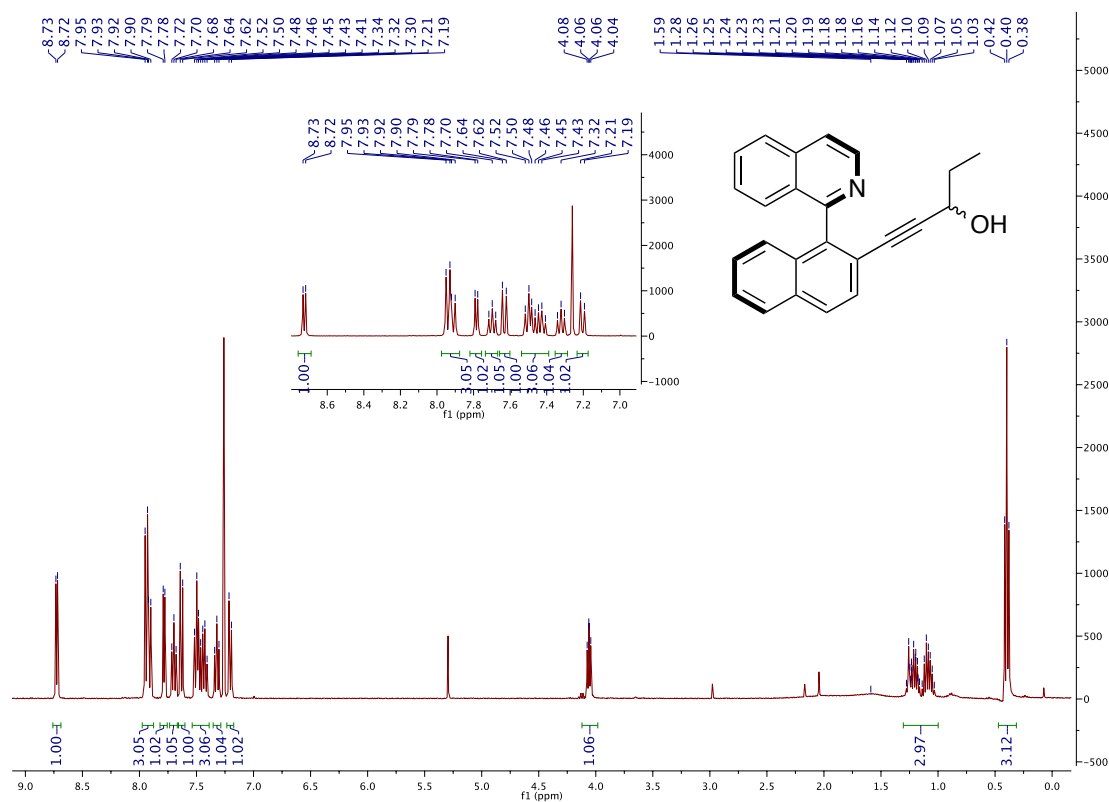

### $^{13}\text{C}$ NMR (100 MHz, $\text{CDCl}_3$ ) of **3Ap diast 1**

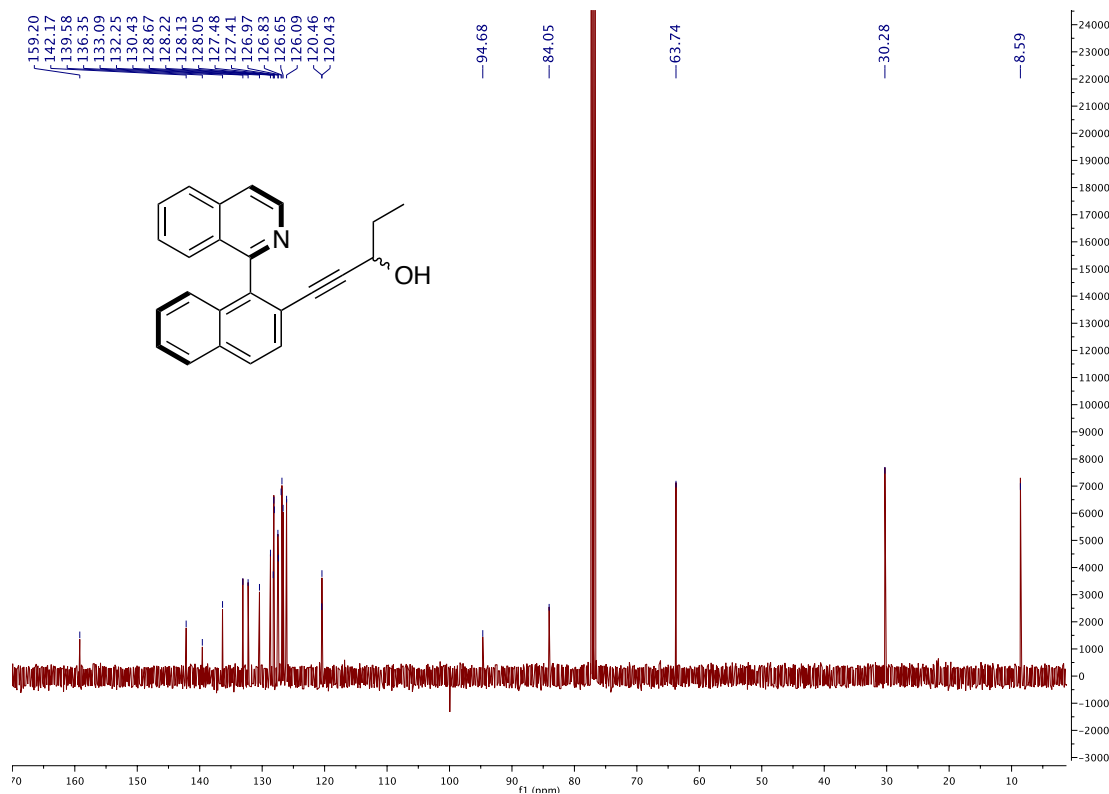

### $^1\text{H}$ NMR (400 MHz, $\text{CDCl}_3$ ) of **3Ap diast 2**

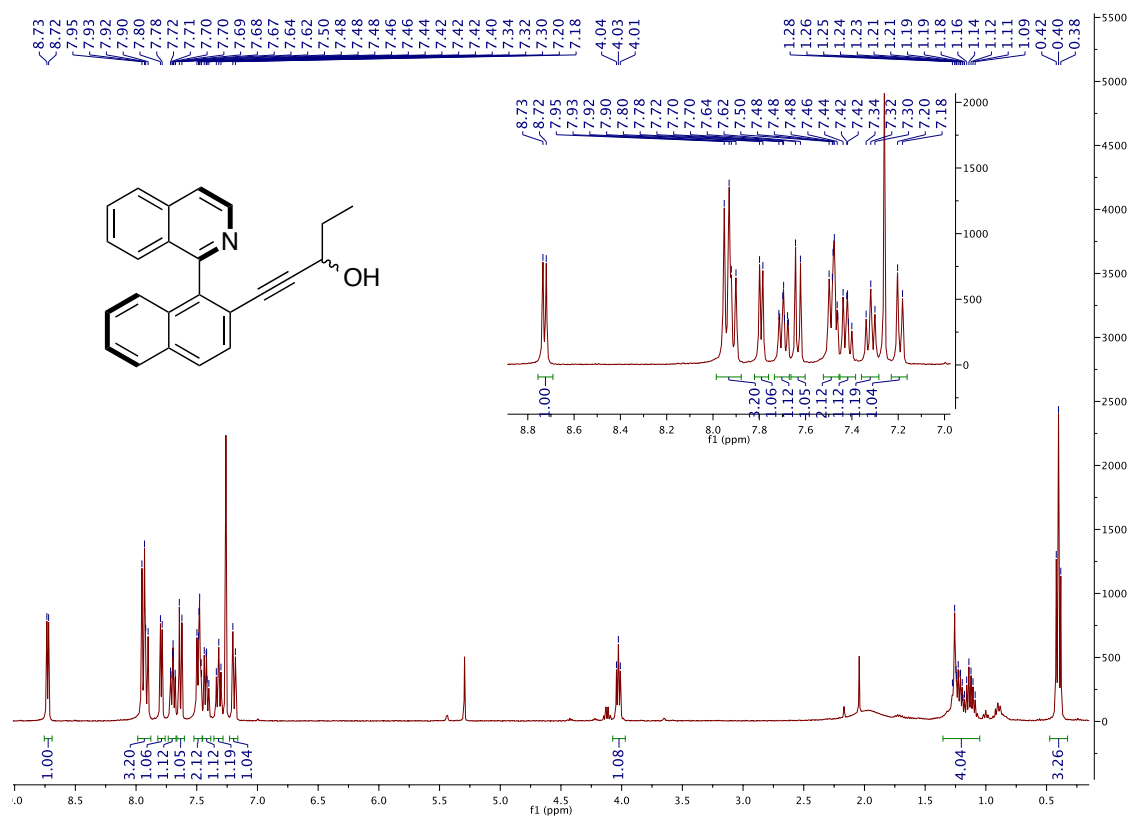

### $^{13}\text{C}$ NMR (100 MHz, $\text{CDCl}_3$ ) of **3Ap diast 2**

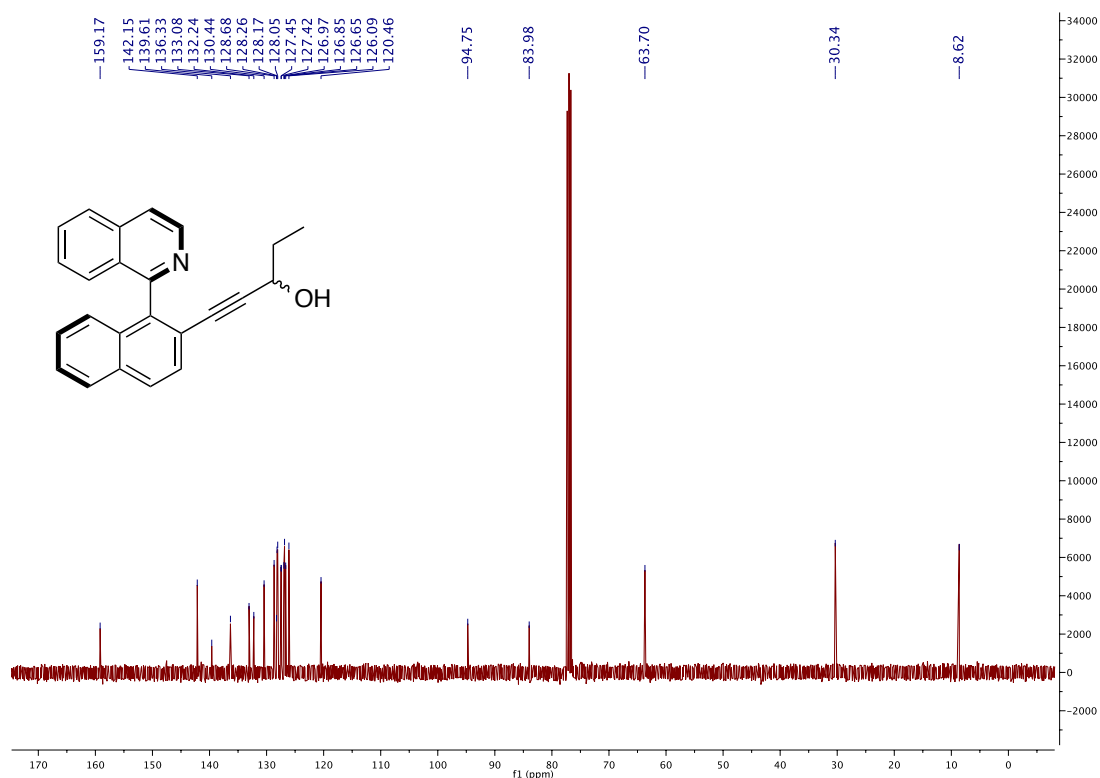

$^1\text{H}$  NMR (400 MHz,  $\text{CDCl}_3$ ) of **3Aq**

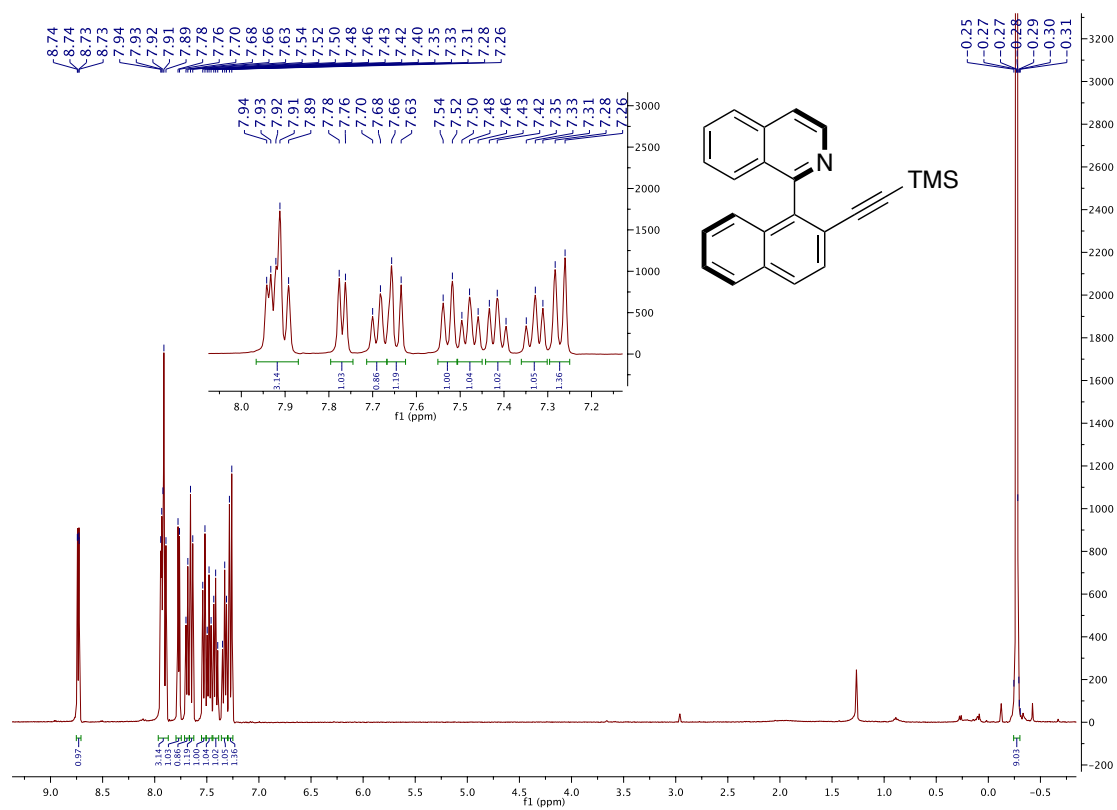

$^{13}\text{C}$  NMR (100 MHz,  $\text{CDCl}_3$ ) of **3Aq**

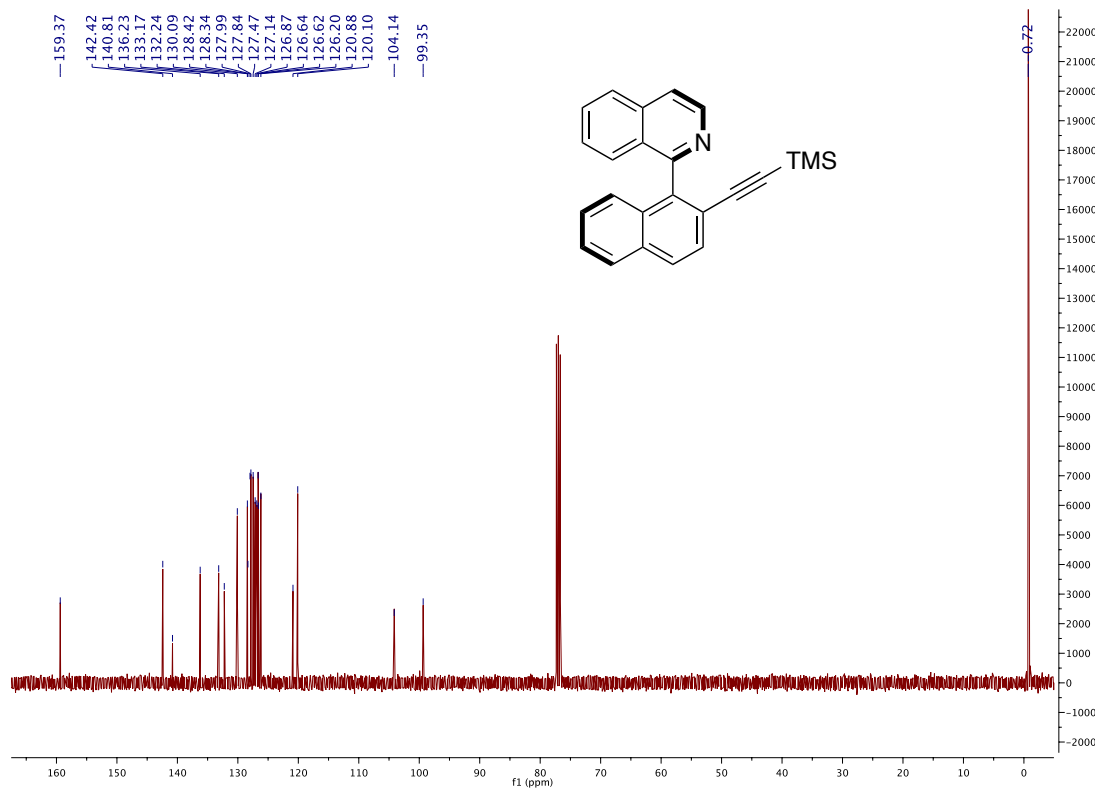

### $^1\text{H}$ NMR (400 MHz, $\text{CDCl}_3$ ) of **4A**

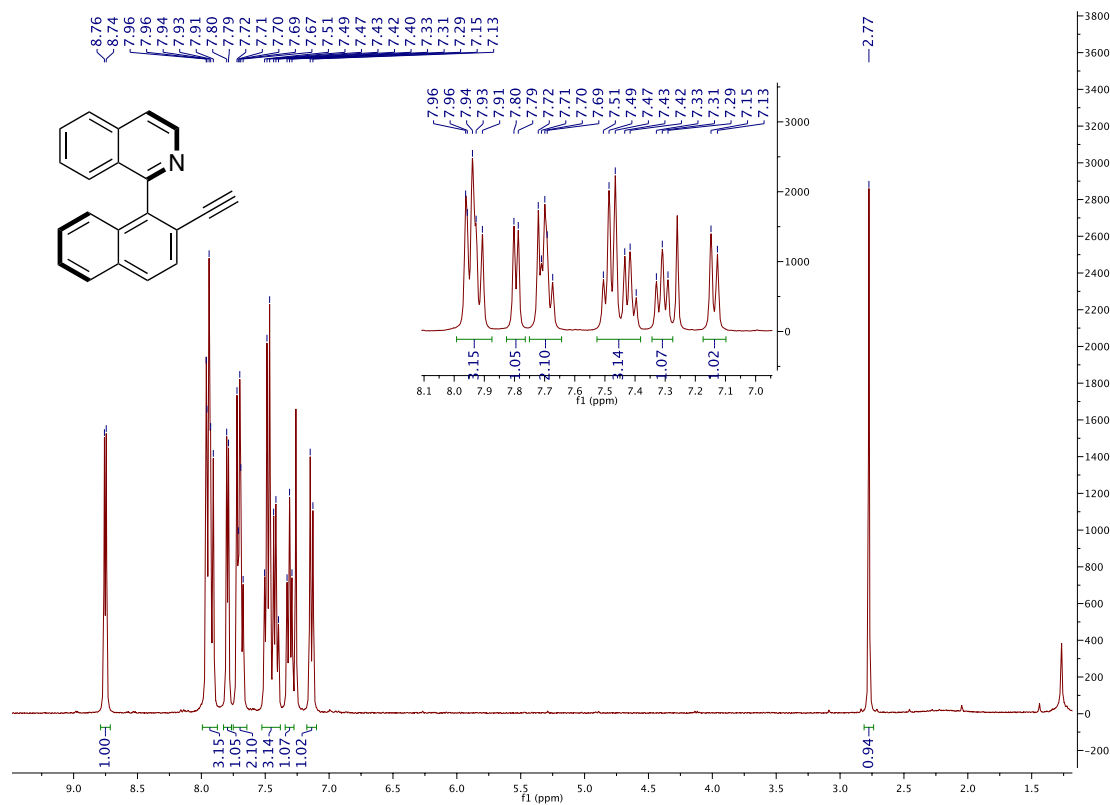

### $^{13}\text{C}$ NMR (100 MHz, $\text{CDCl}_3$ ) of **4A**

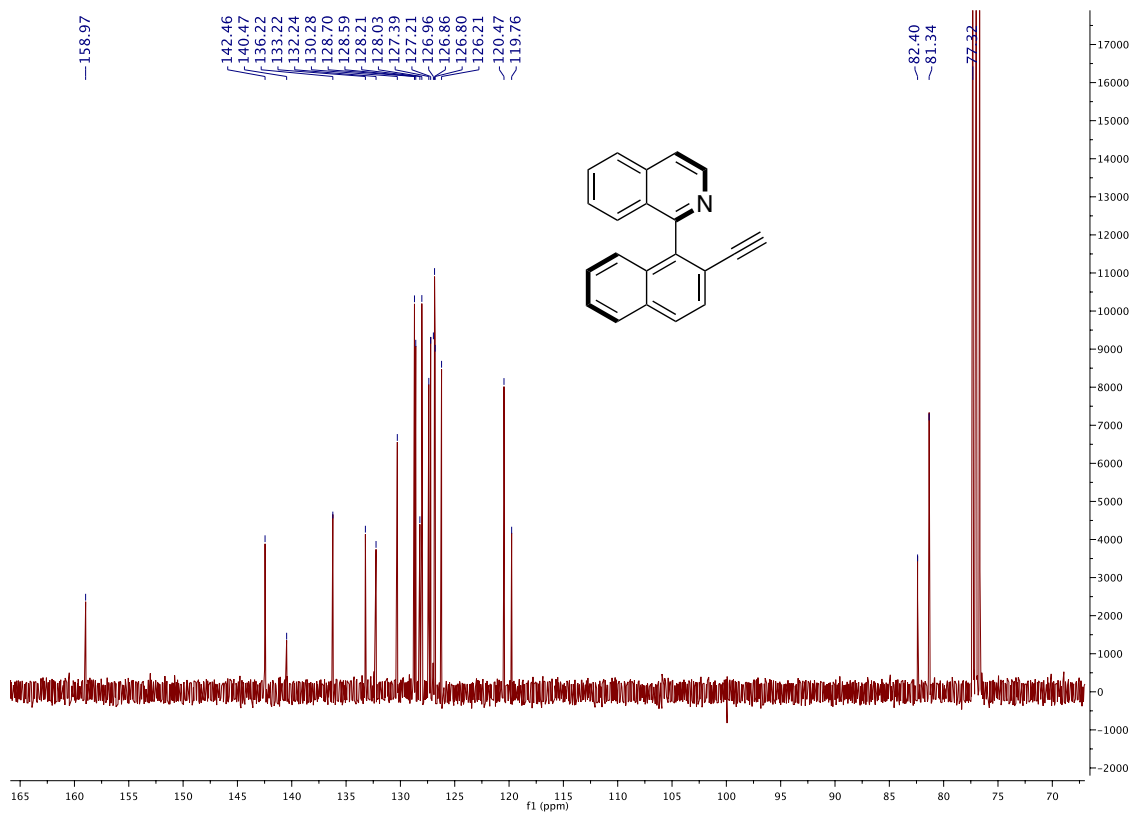

<sup>1</sup>H NMR (400 MHz, CDCl<sub>3</sub>) of **3Ba**

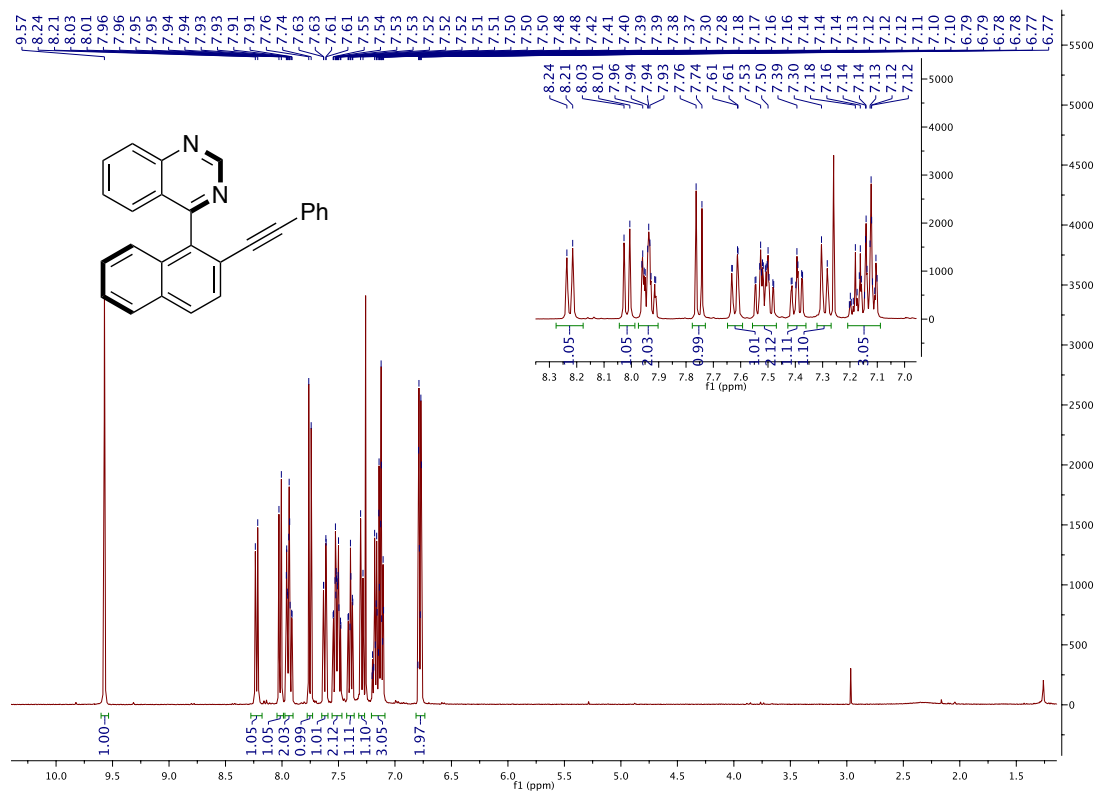

<sup>13</sup>C NMR (100 MHz, CDCl<sub>3</sub>) of **3Ba**

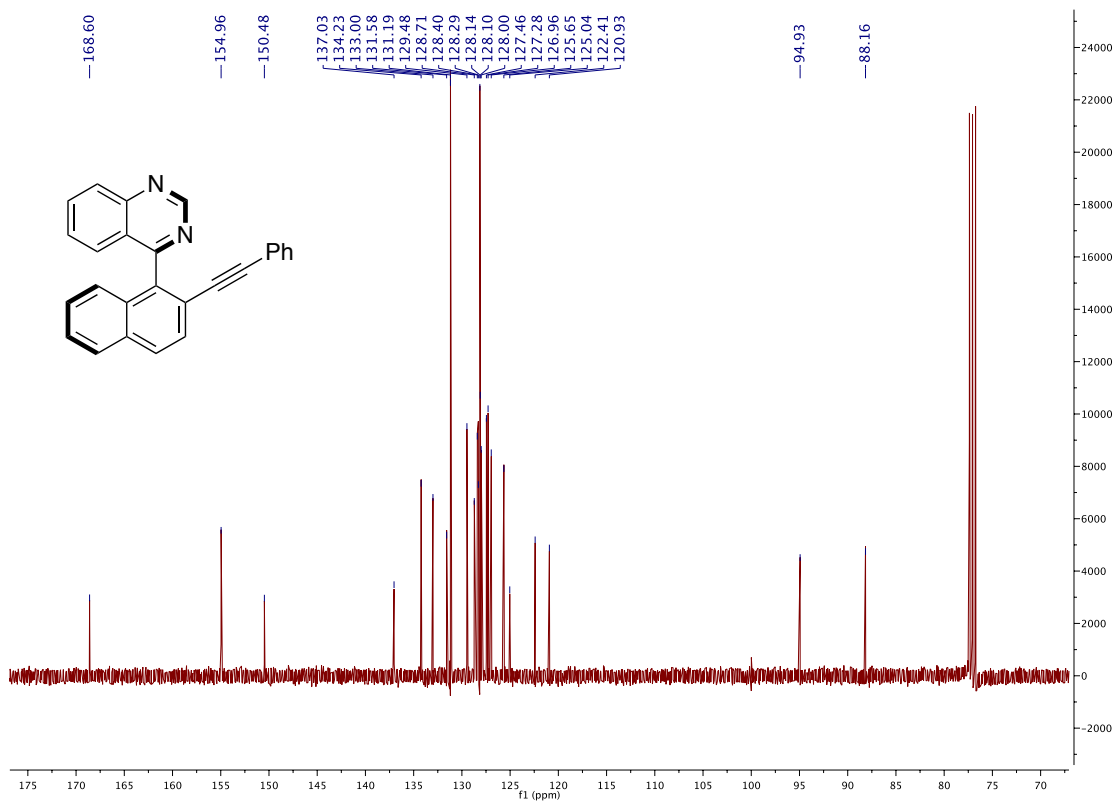

<sup>1</sup>H NMR (400 MHz, CDCl<sub>3</sub>) of **3Bn**

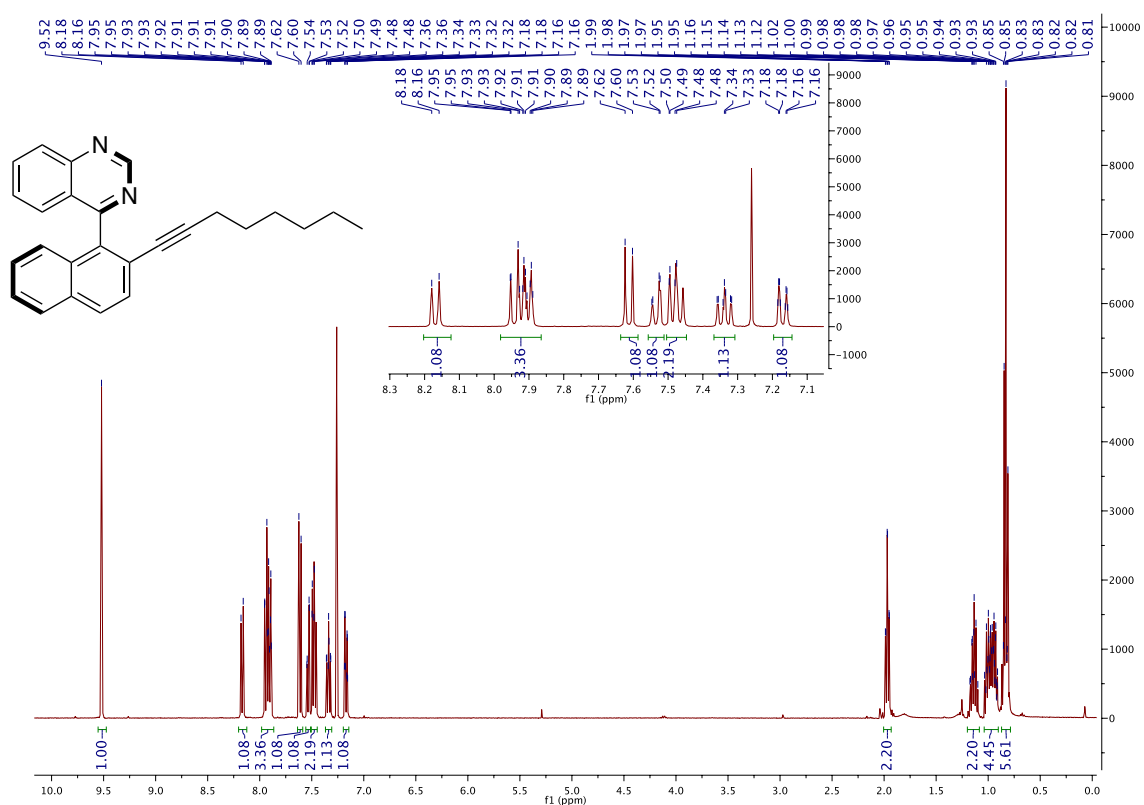

<sup>13</sup>C NMR (100 MHz, CDCl<sub>3</sub>) of **3Bn**

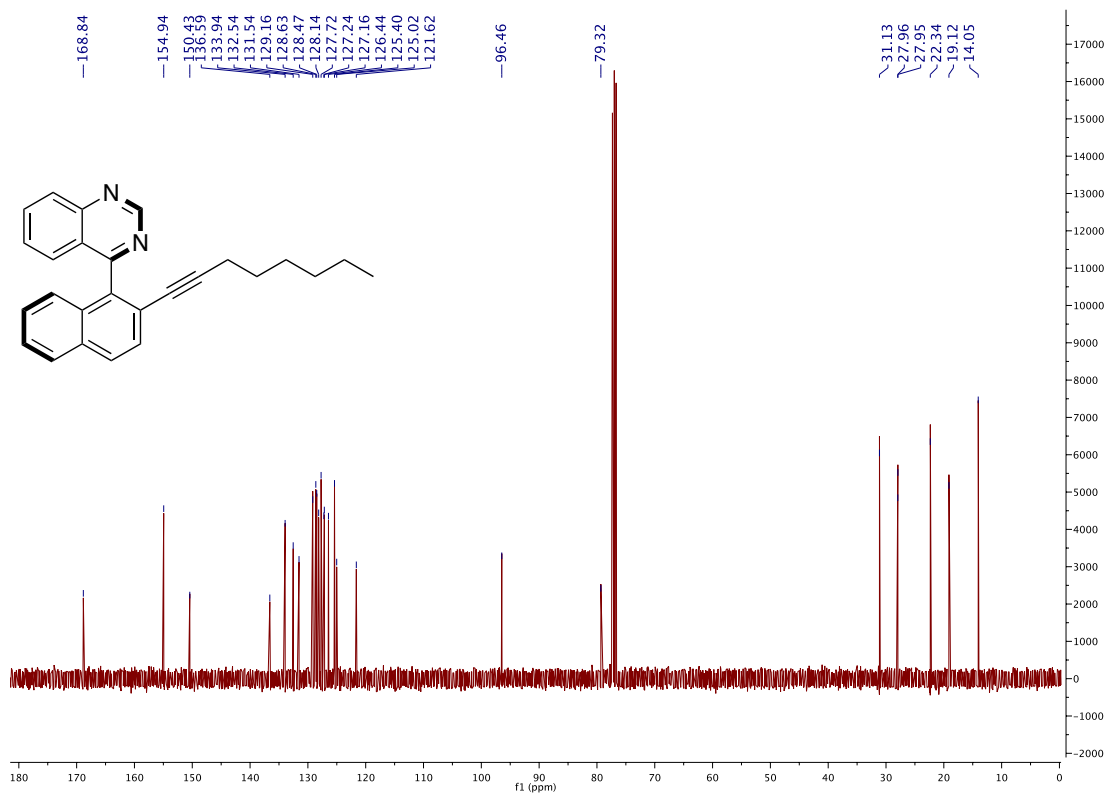

<sup>1</sup>H NMR (400 MHz, CDCl<sub>3</sub>) of **3Bq**

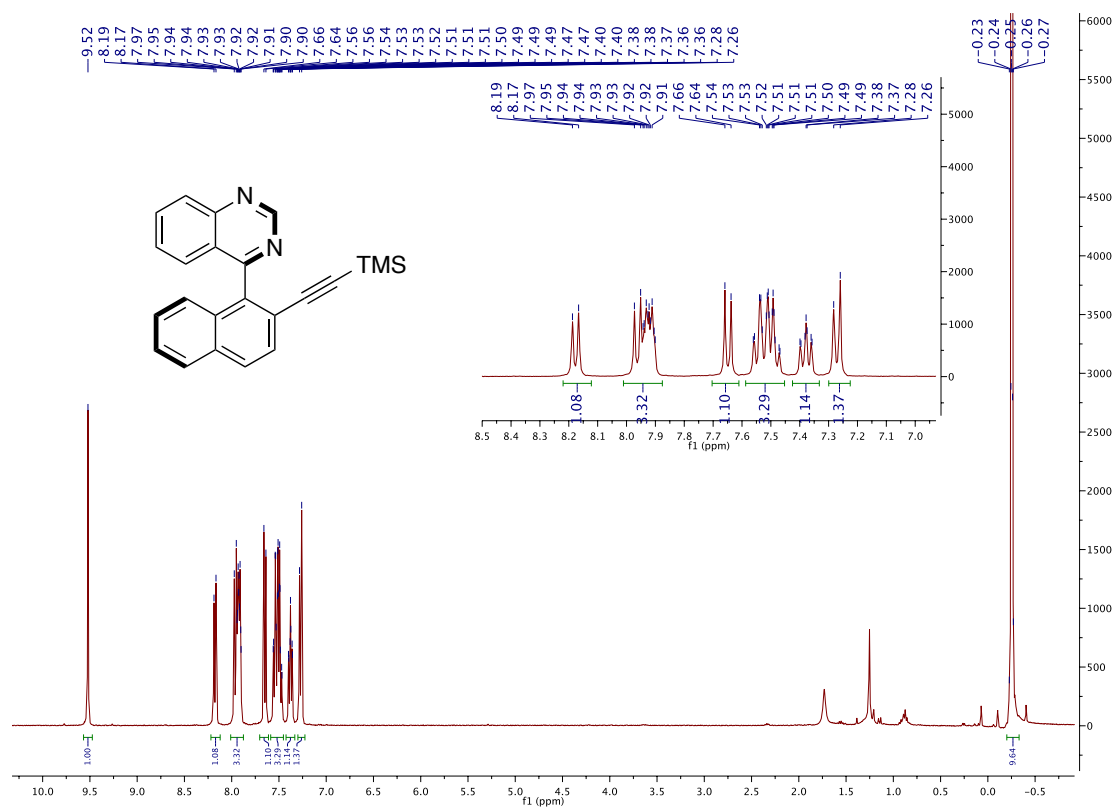

<sup>13</sup>C NMR (100 MHz, CDCl<sub>3</sub>) of **3Bq**

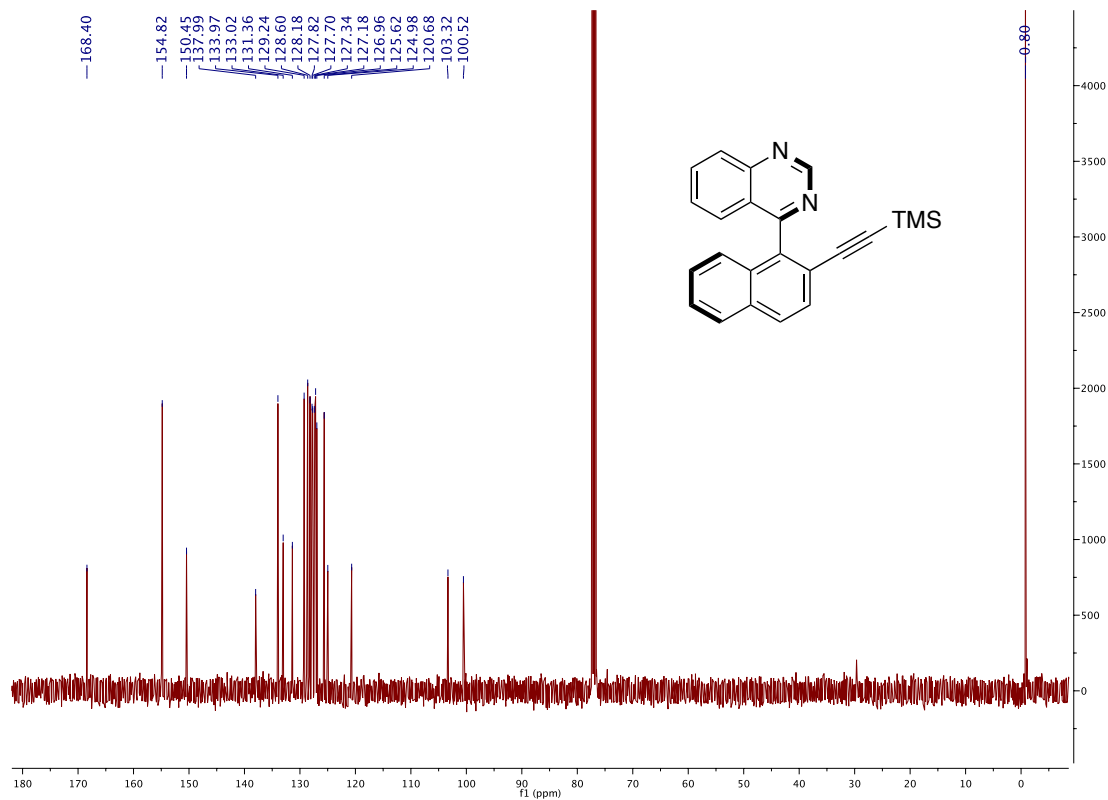



<sup>1</sup>H NMR (400 MHz, CDCl<sub>3</sub>) of **4B**

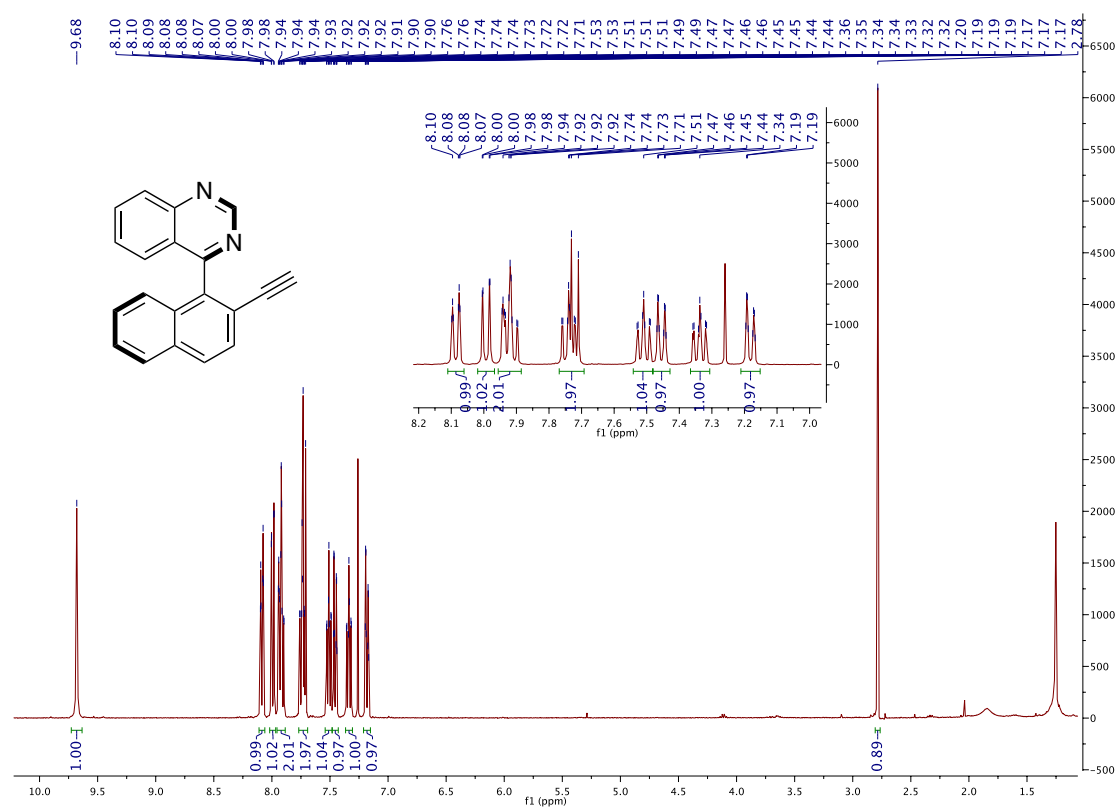

<sup>13</sup>C NMR (100 MHz, CDCl<sub>3</sub>) of **4B**

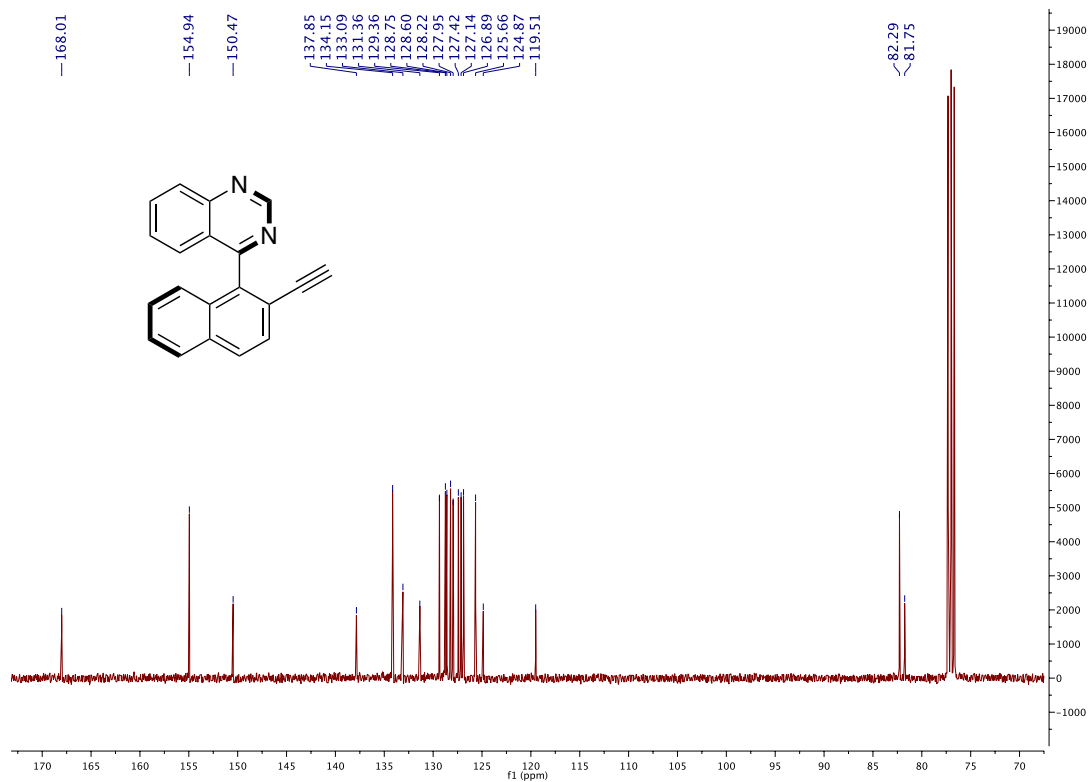

# <sup>1</sup>H NMR (400 MHz, CDCl<sub>3</sub>) of 3Ca

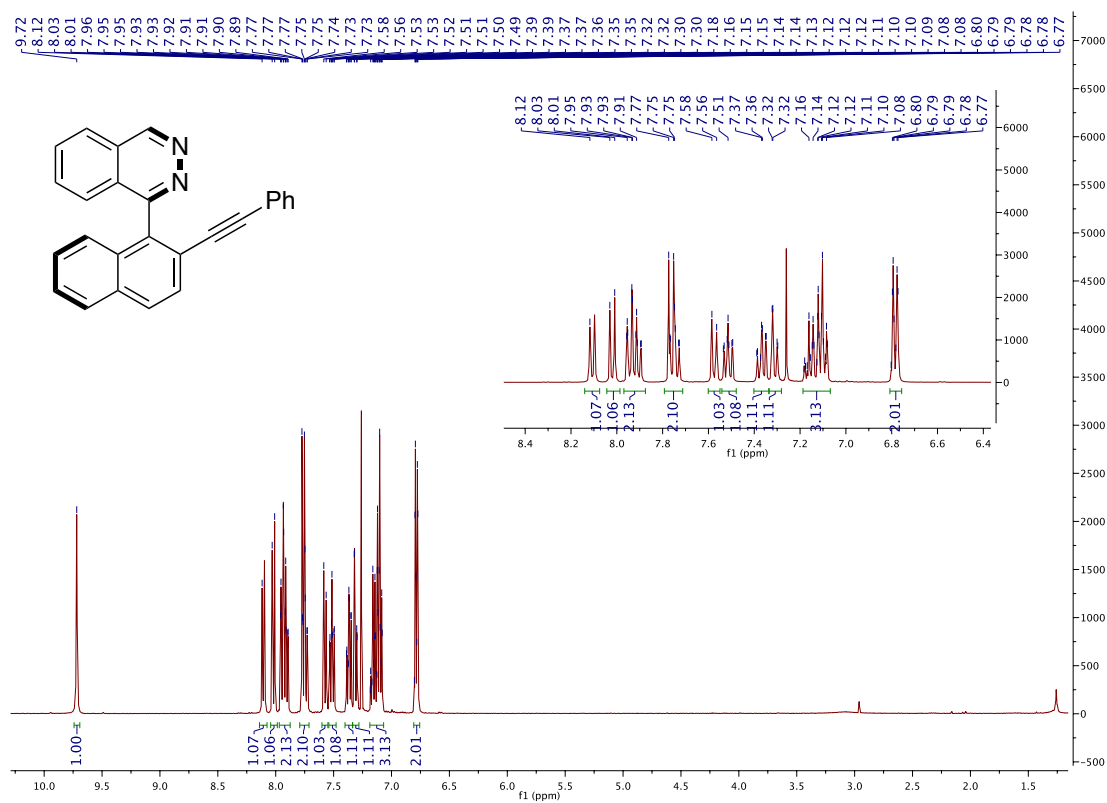

# <sup>13</sup>C NMR (100 MHz, CDCl<sub>3</sub>) of 3Ca

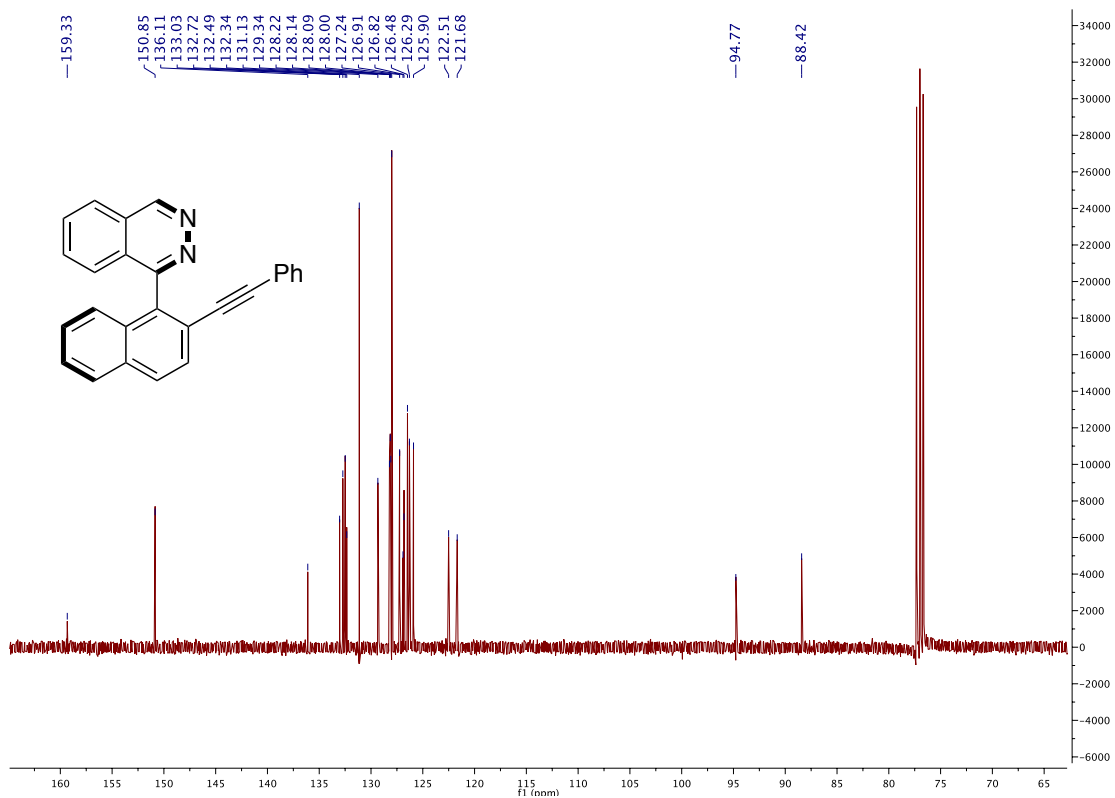

### $^1\text{H}$ NMR (400 MHz, $\text{CDCl}_3$ ) of **3Cn**

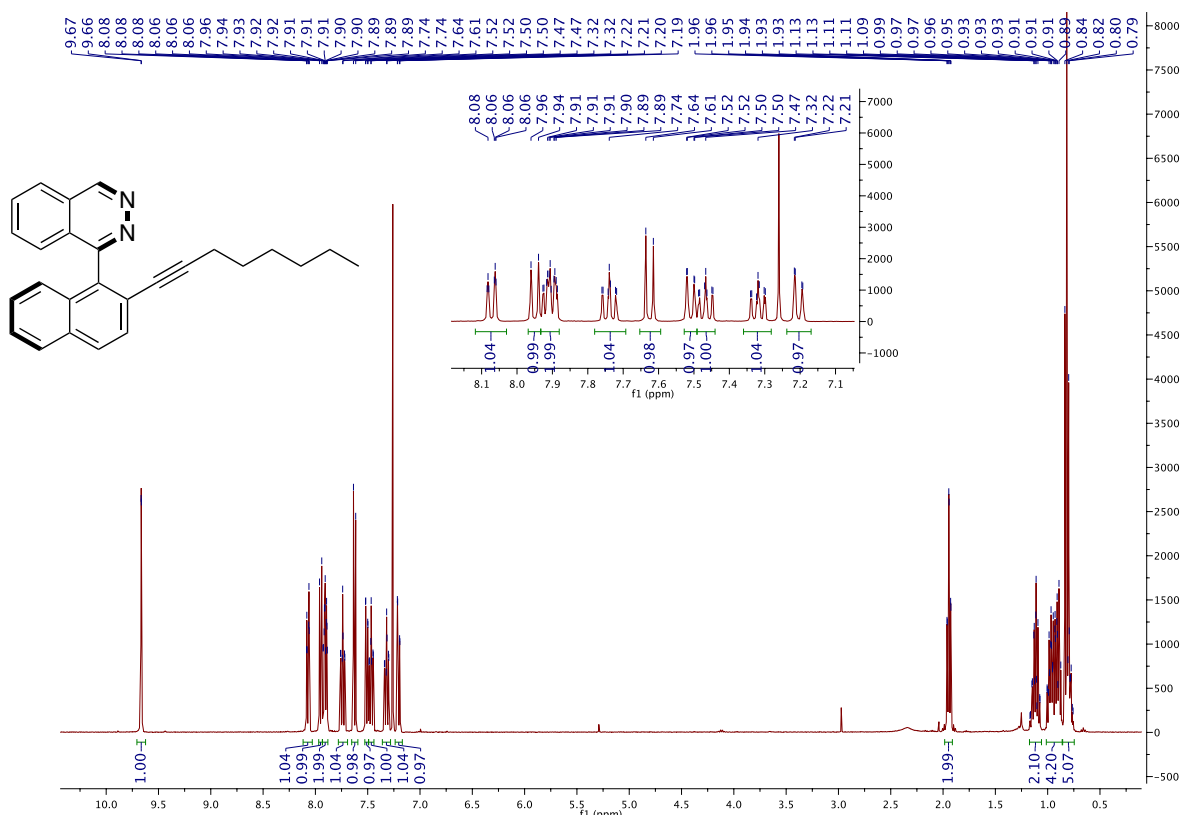

### $^{13}\text{C}$ NMR (100 MHz, $\text{CDCl}_3$ ) of **3Cn**

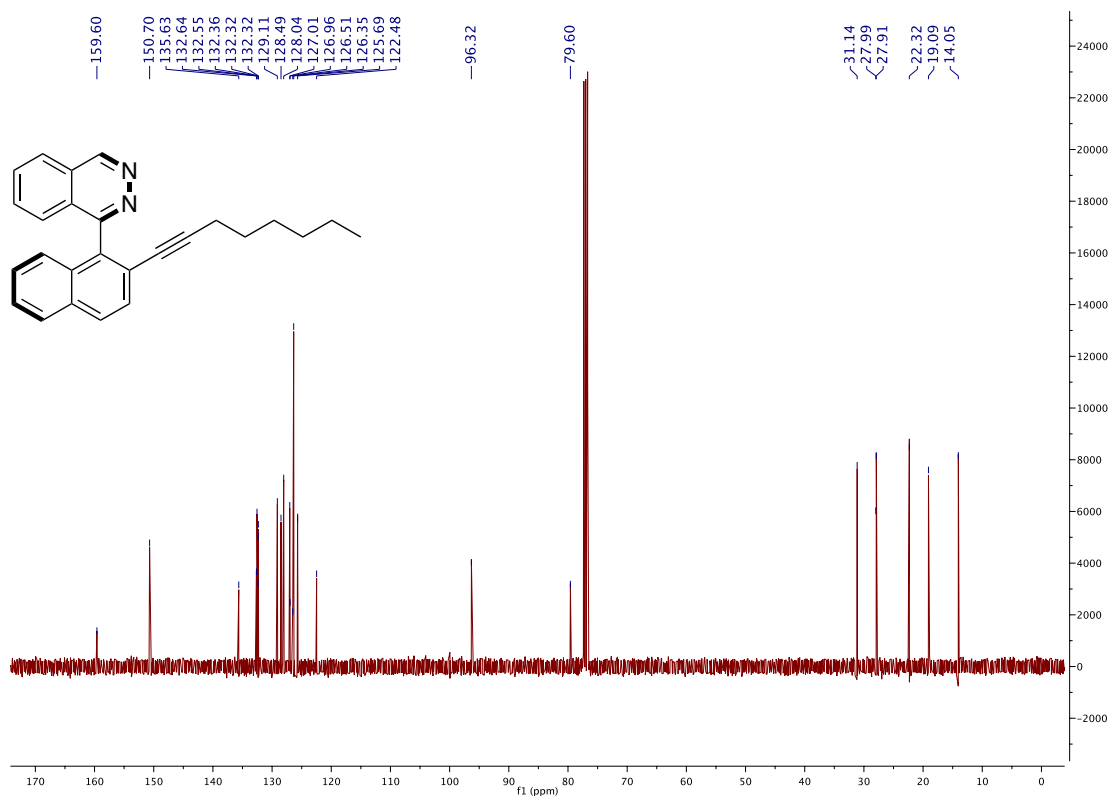

$^1\text{H}$  NMR (400 MHz,  $\text{CDCl}_3$ ) of **3Cq**

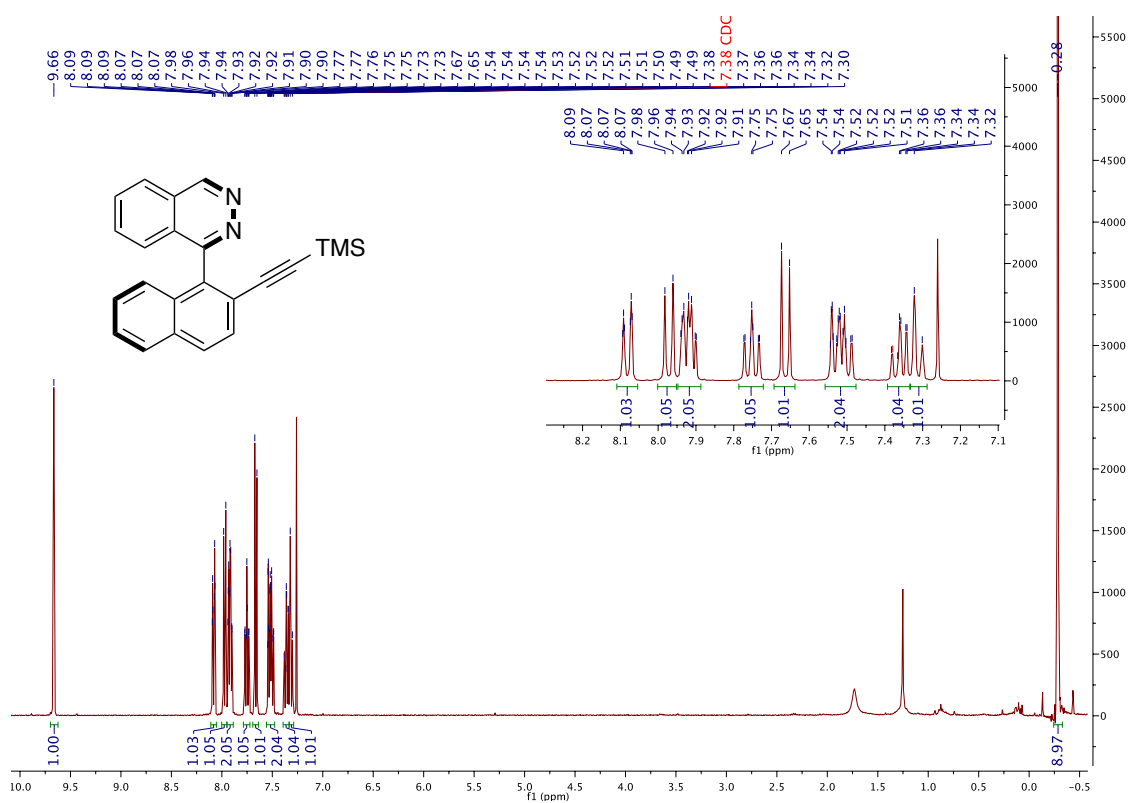

$^{13}\text{C}$  NMR (100 MHz,  $\text{CDCl}_3$ ) of **3Cq**

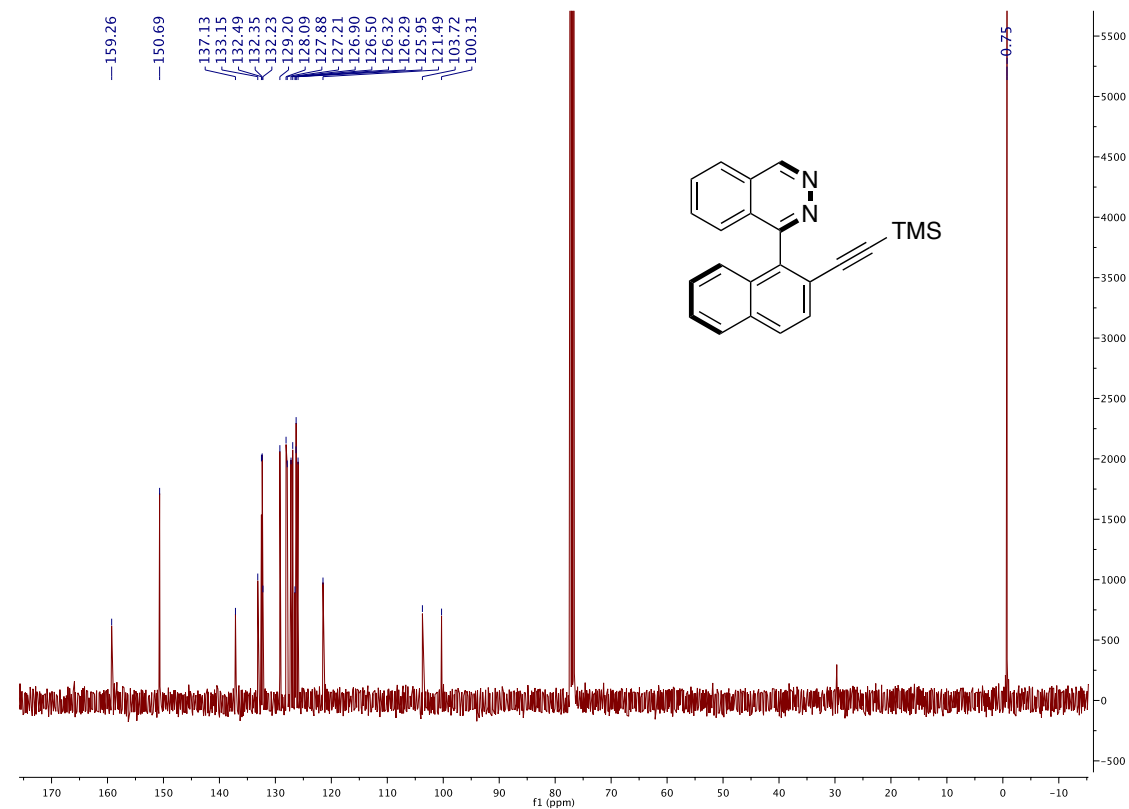

$^1\text{H}$  NMR (400 MHz,  $\text{CDCl}_3$ ) of **4C**

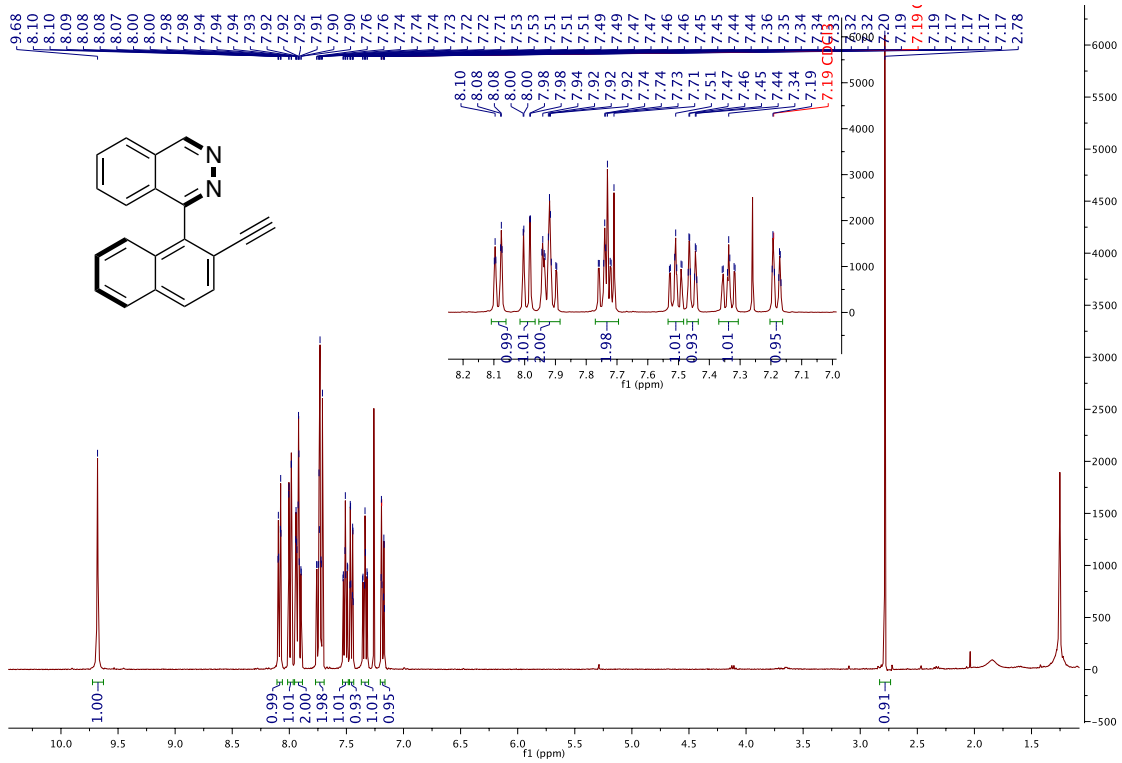

$^{13}\text{C}$  NMR (100 MHz,  $\text{CDCl}_3$ ) of **4C**

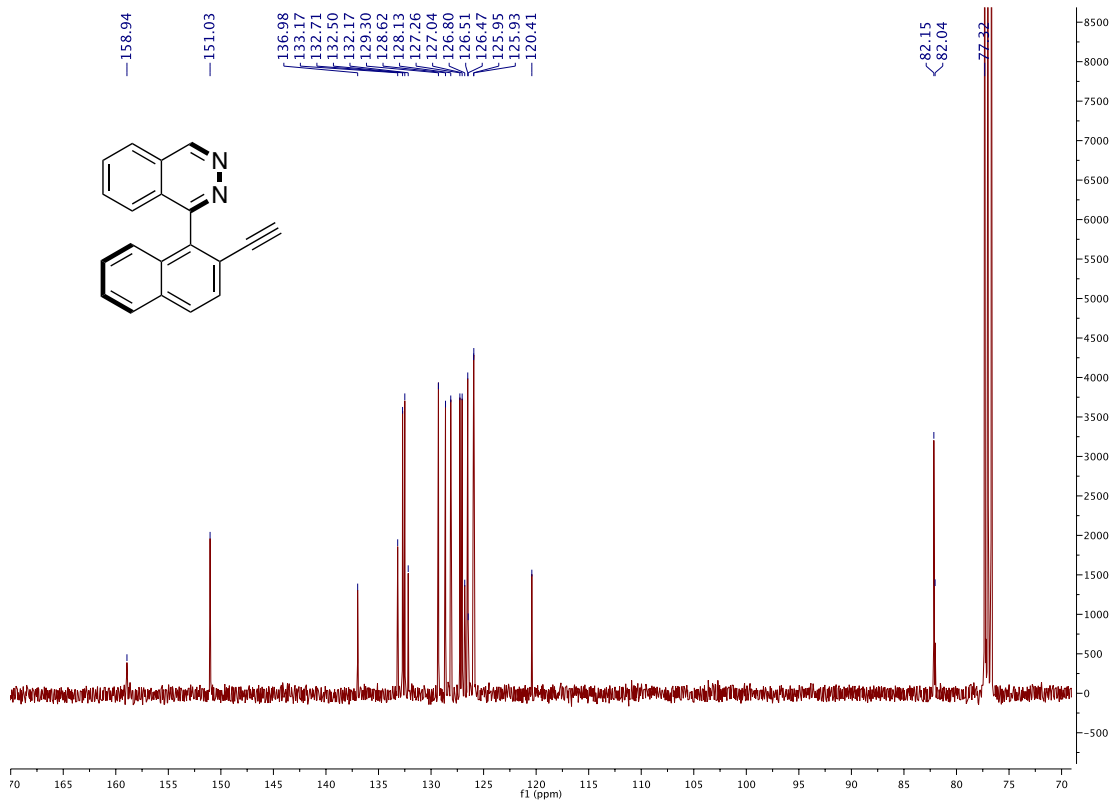

### <sup>1</sup>H NMR (400 MHz, CDCl<sub>3</sub>) of **3Da**

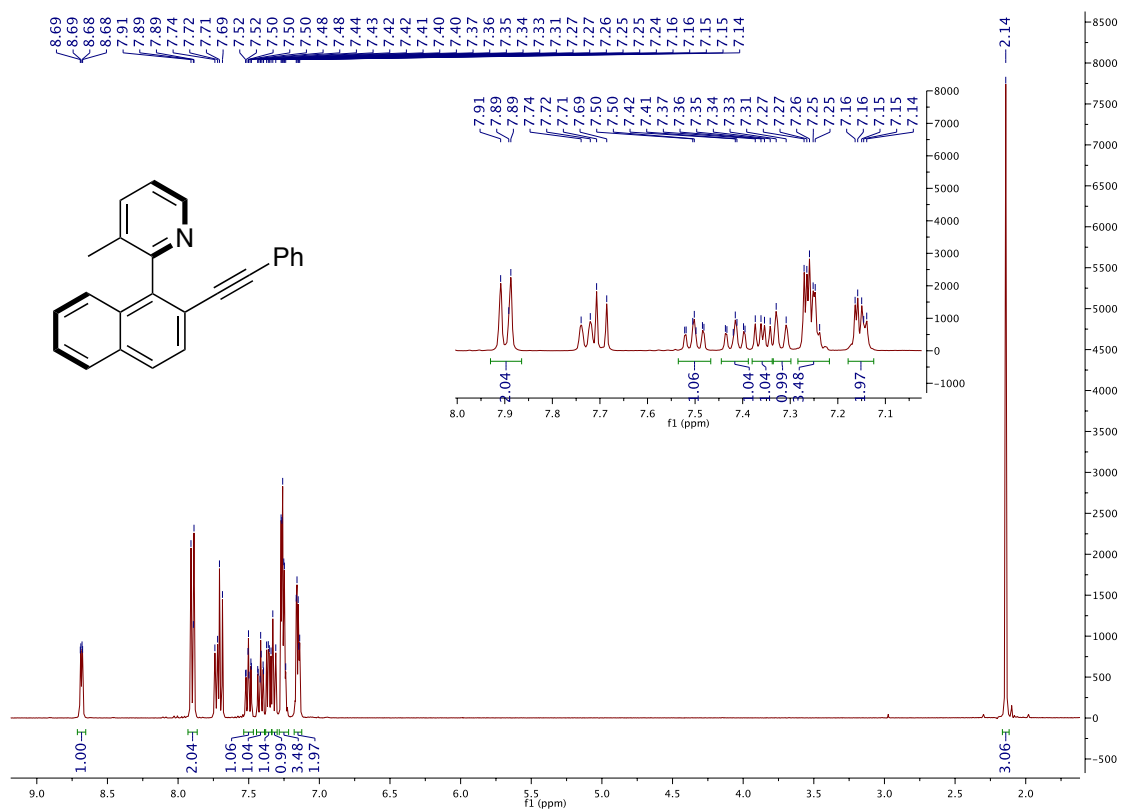

### <sup>13</sup>C NMR (100 MHz, CDCl<sub>3</sub>) of **3Da**

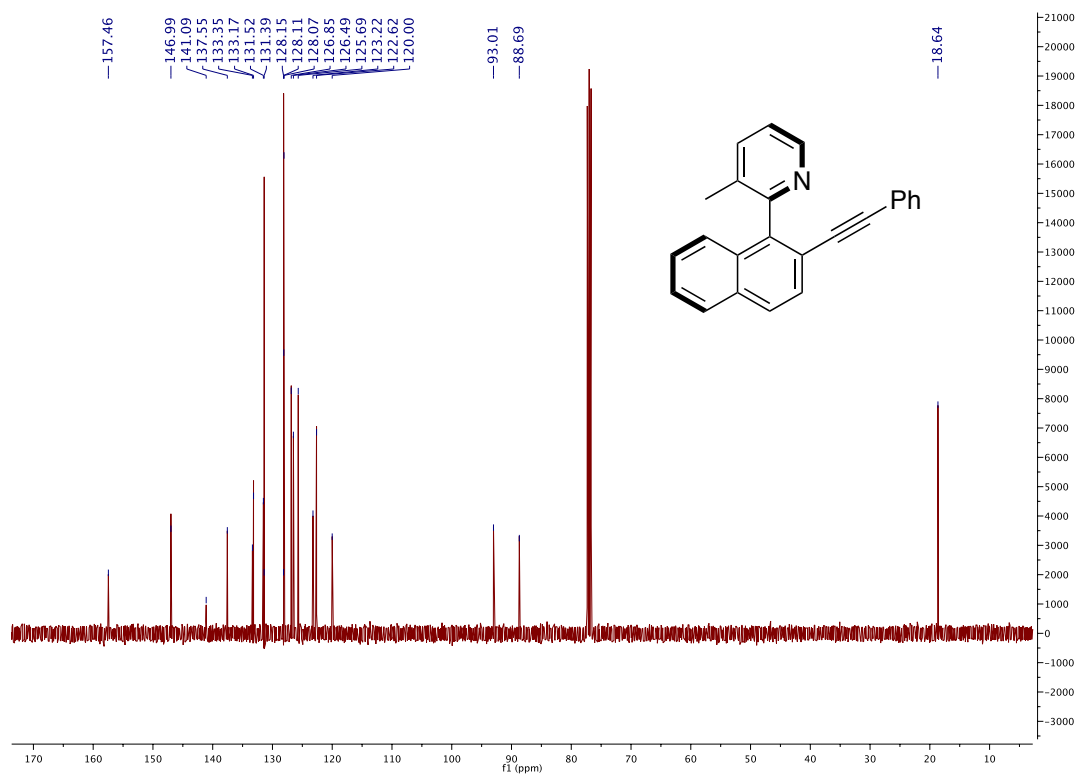

# <sup>1</sup>H NMR (400 MHz, CDCl<sub>3</sub>) of 3Dn

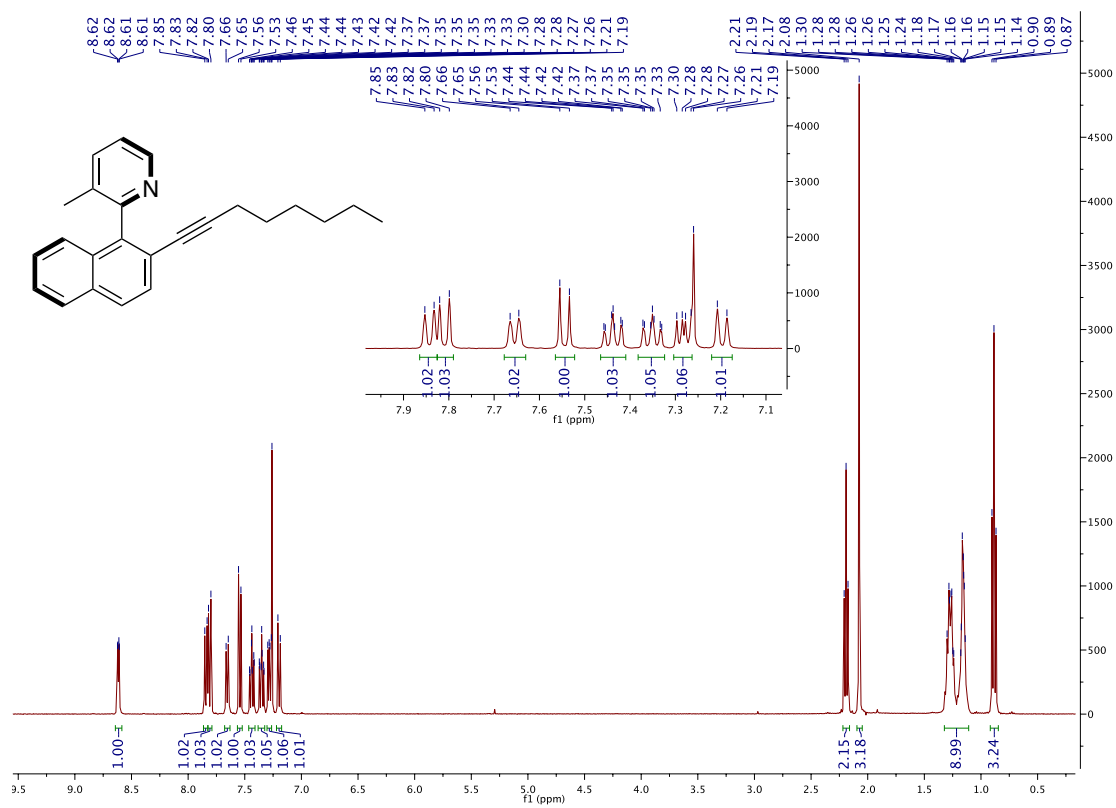

# <sup>13</sup>C NMR (100 MHz, CDCl<sub>3</sub>) of 3Dn

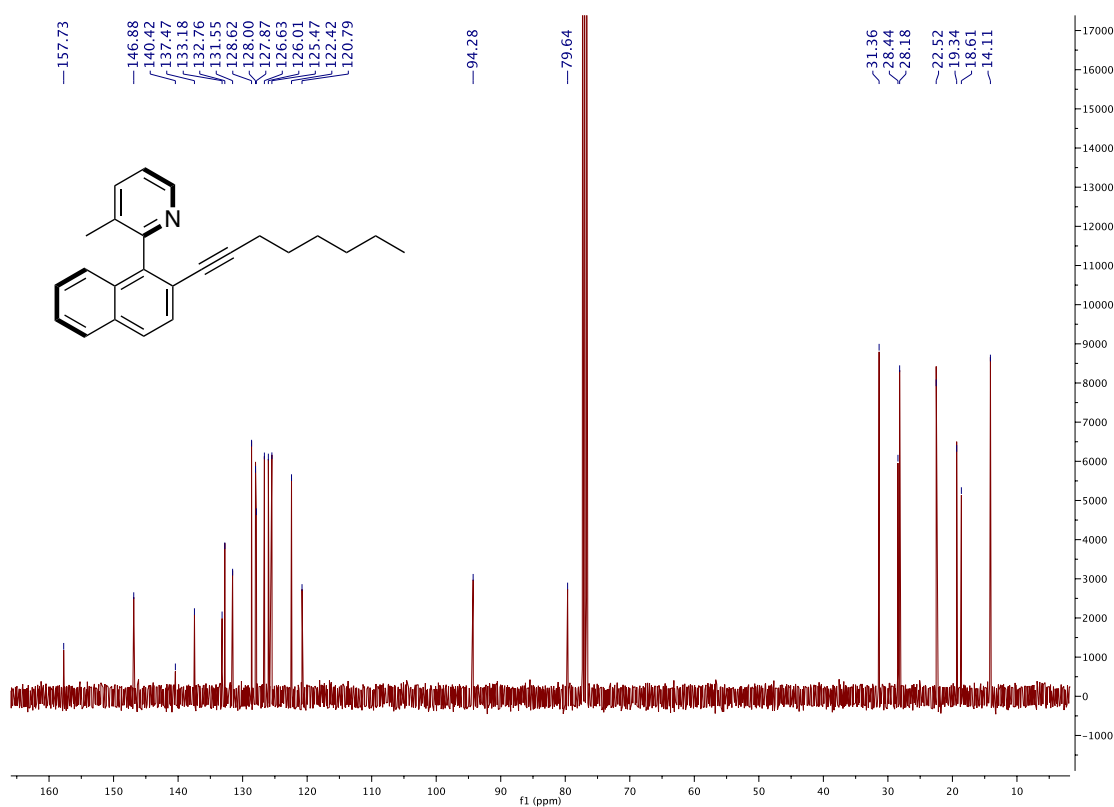

<sup>1</sup>H NMR (400 MHz, CDCl<sub>3</sub>) of **3Dq**

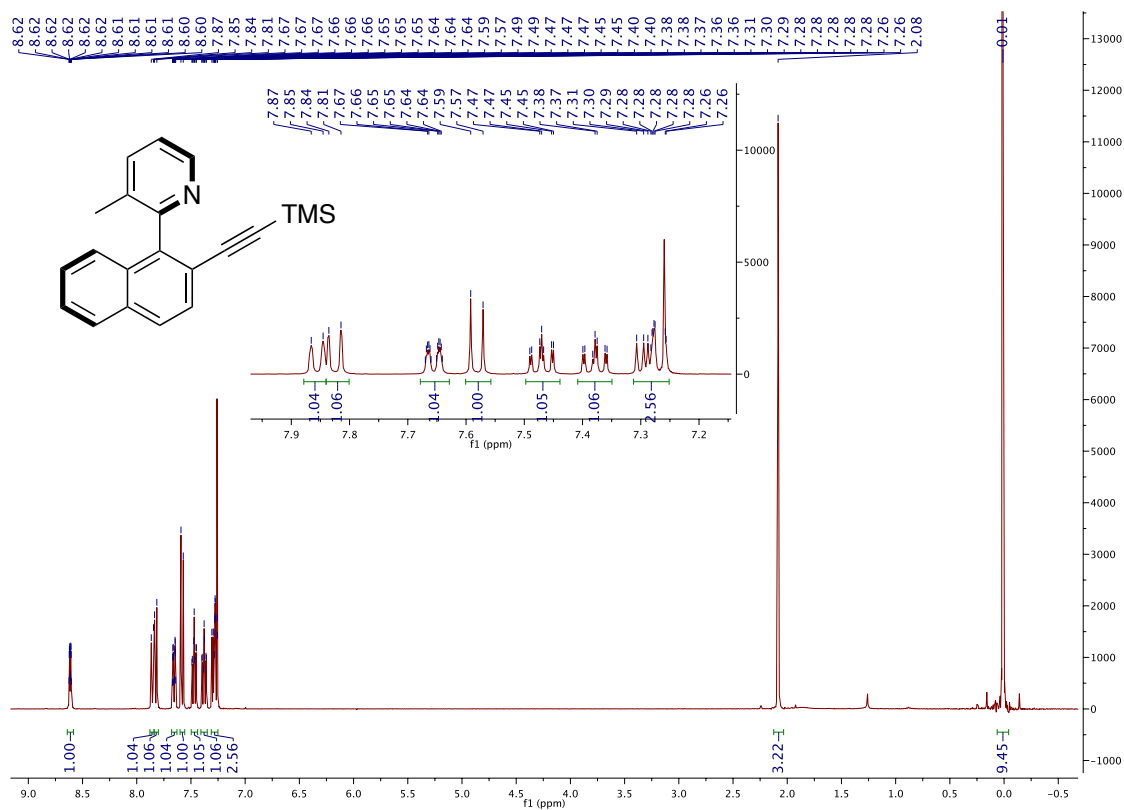

<sup>13</sup>C NMR (100 MHz, CDCl<sub>3</sub>) of **3Dq**

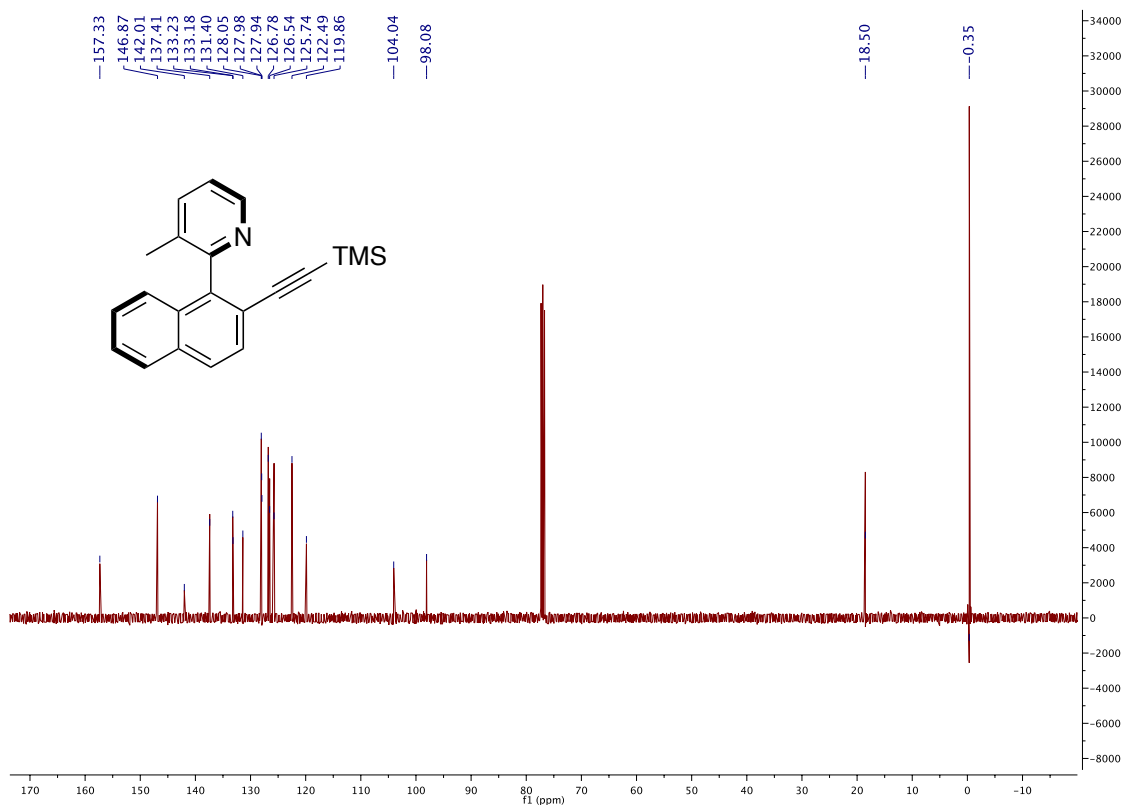



### $^1\text{H}$ NMR (400 MHz, $\text{CDCl}_3$ ) of **3Ea**

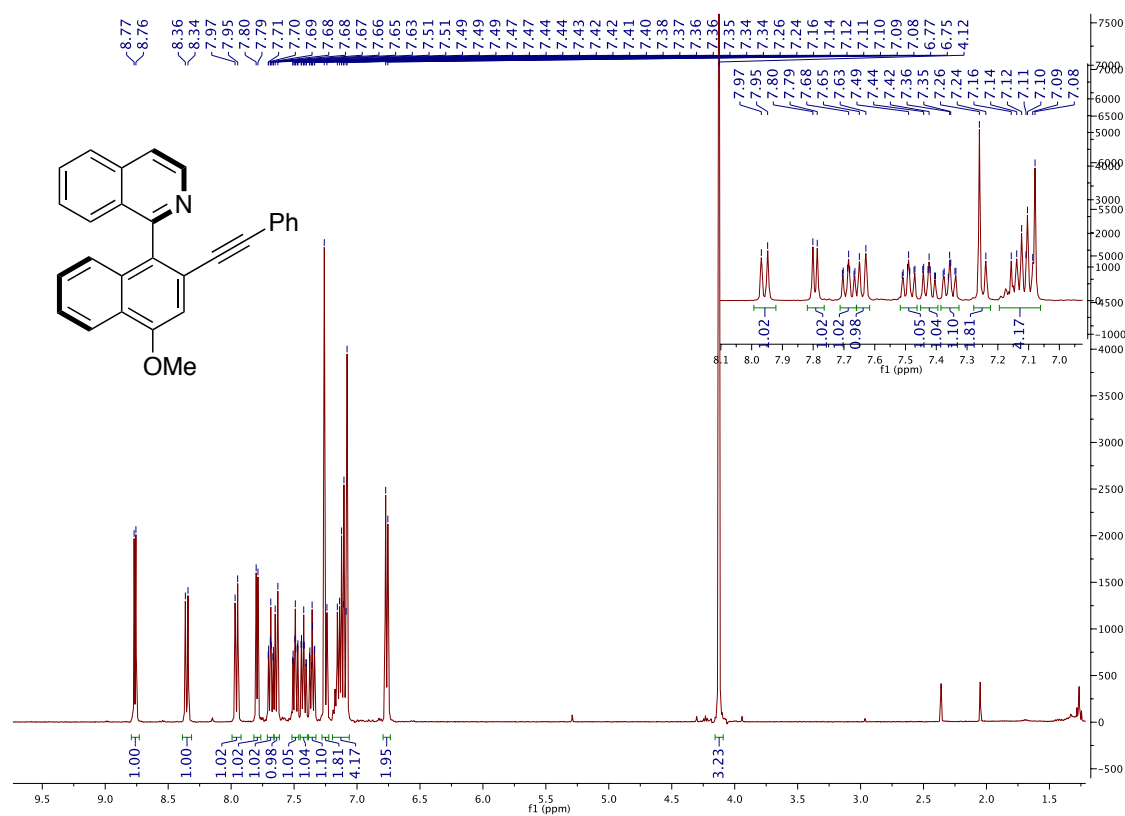

### $^{13}\text{C}$ NMR (100 MHz, $\text{CDCl}_3$ ) of **3Ea**

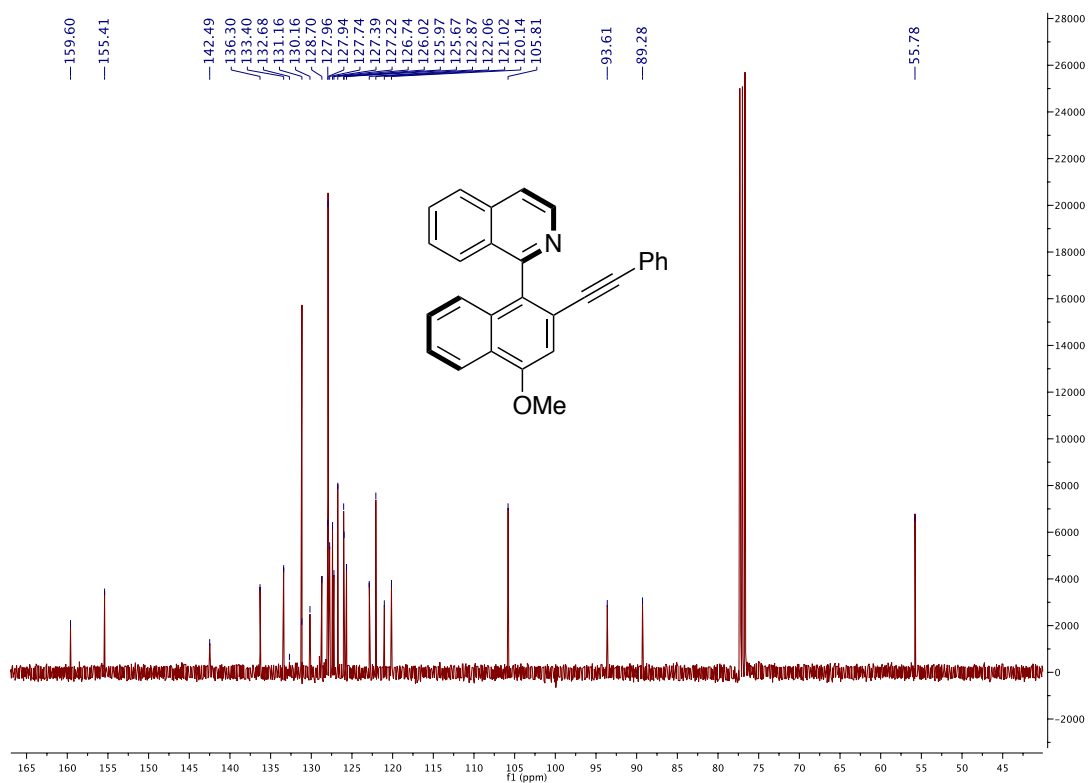

# $^1\text{H}$ NMR (400 MHz, $\text{CDCl}_3$ ) of **3En**

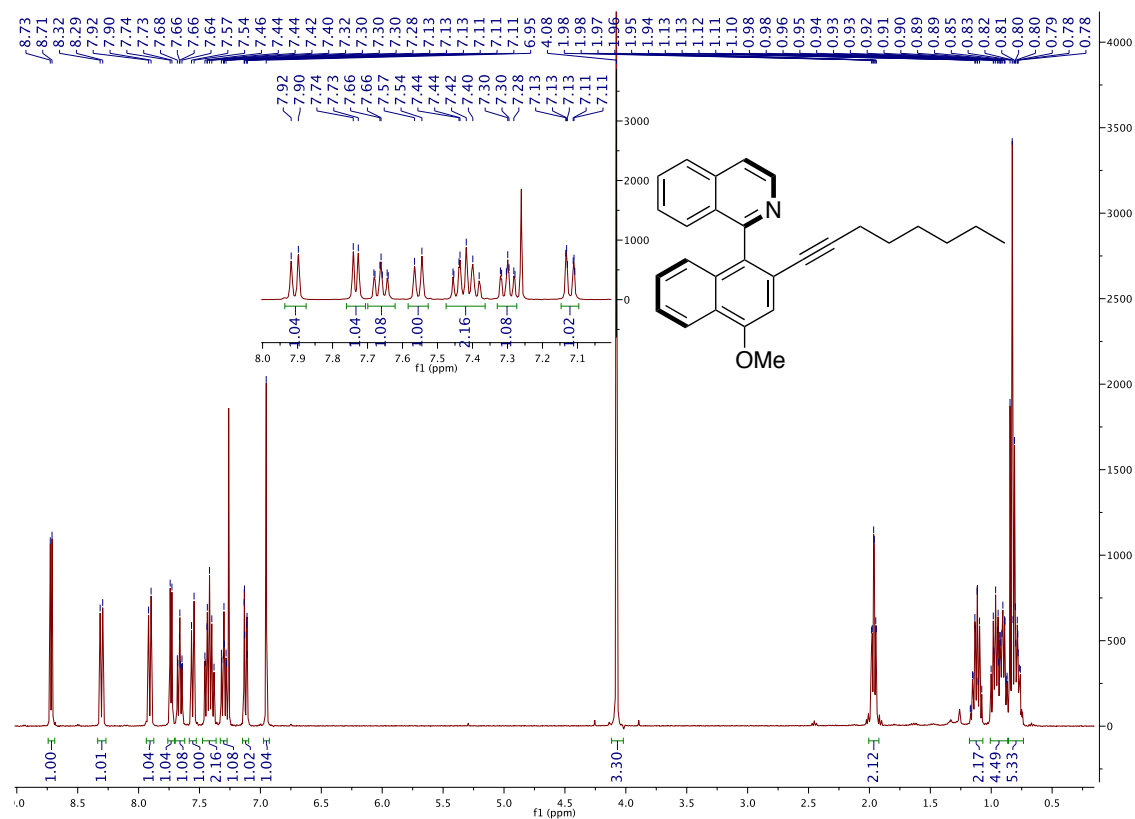

# $^{13}\text{C}$ NMR (100 MHz, $\text{CDCl}_3$ ) of **3En**

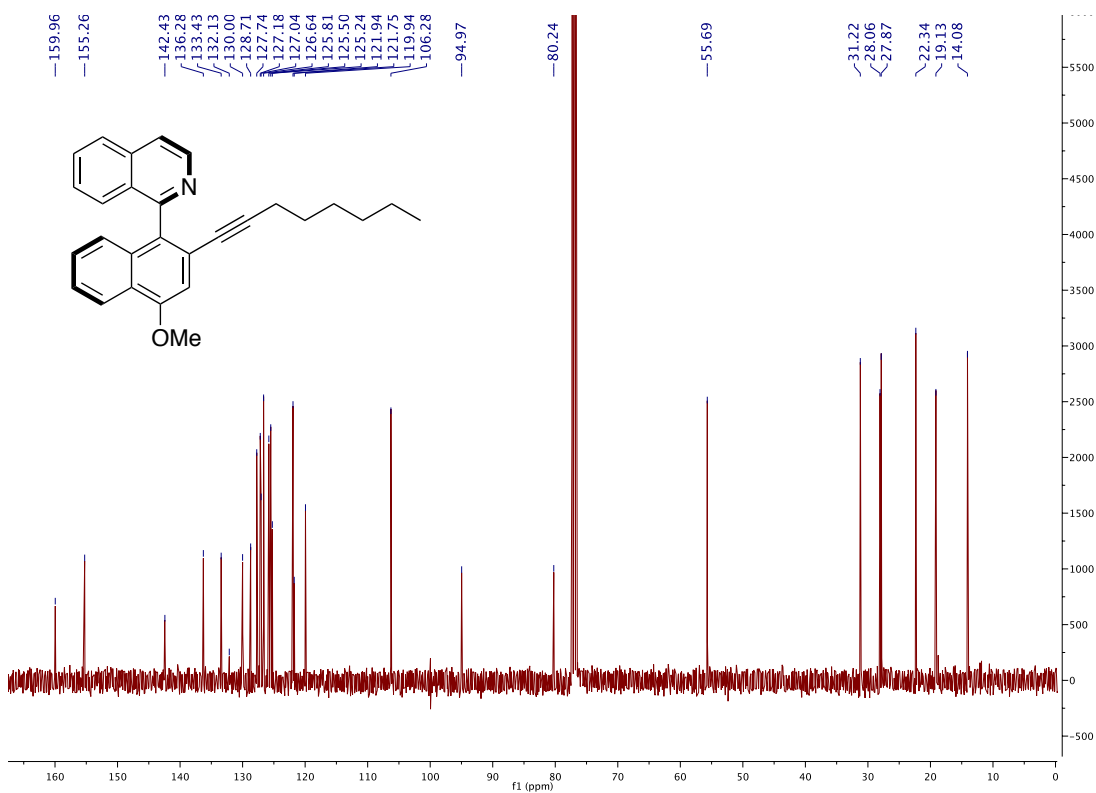

### <sup>1</sup>H NMR (400 MHz, CDCl<sub>3</sub>) of 3Eq

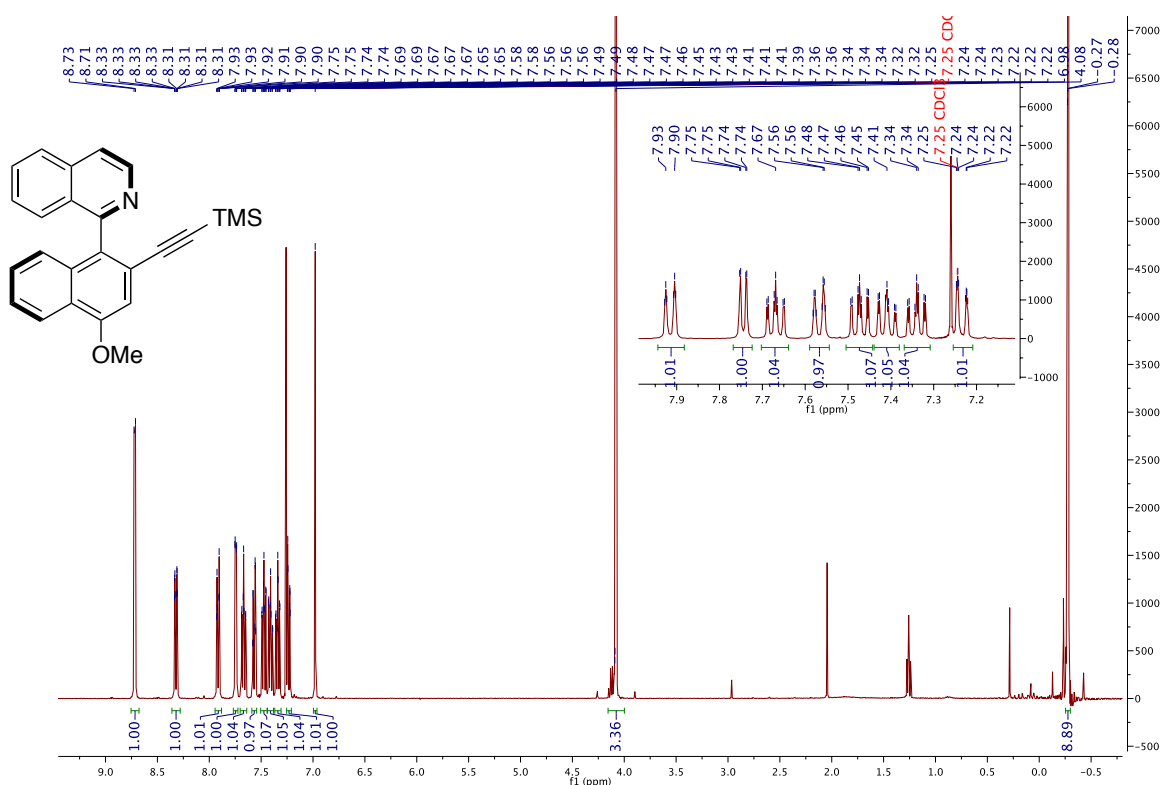

### <sup>13</sup>C NMR (100 MHz, CDCl<sub>3</sub>) of 3Eq

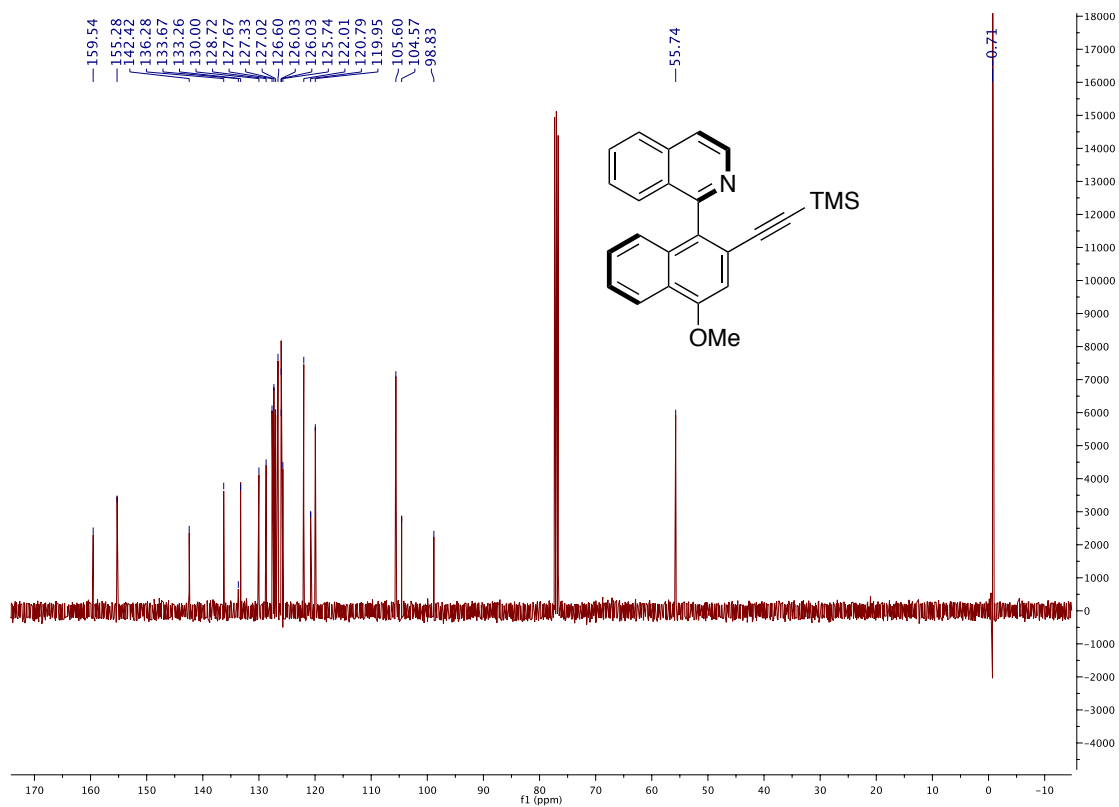

<sup>1</sup>H NMR (400 MHz, CDCl<sub>3</sub>) of **5**

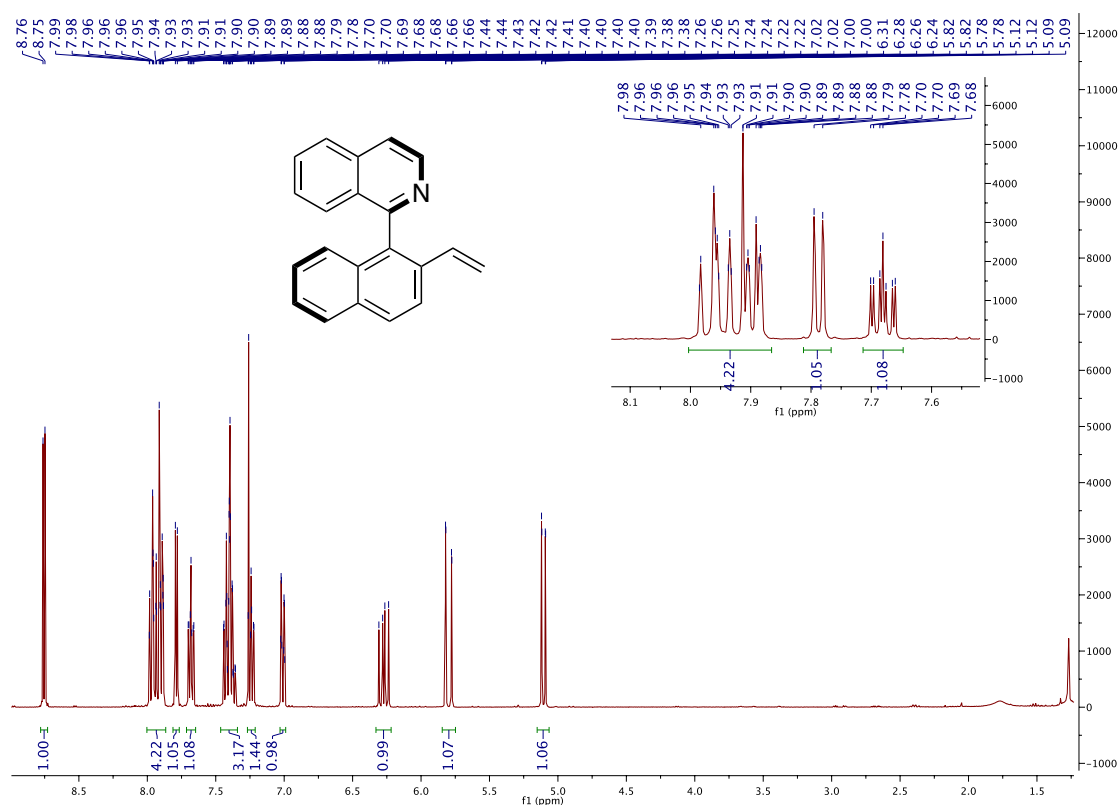

<sup>13</sup>C NMR (100 MHz, CDCl<sub>3</sub>) of **5**

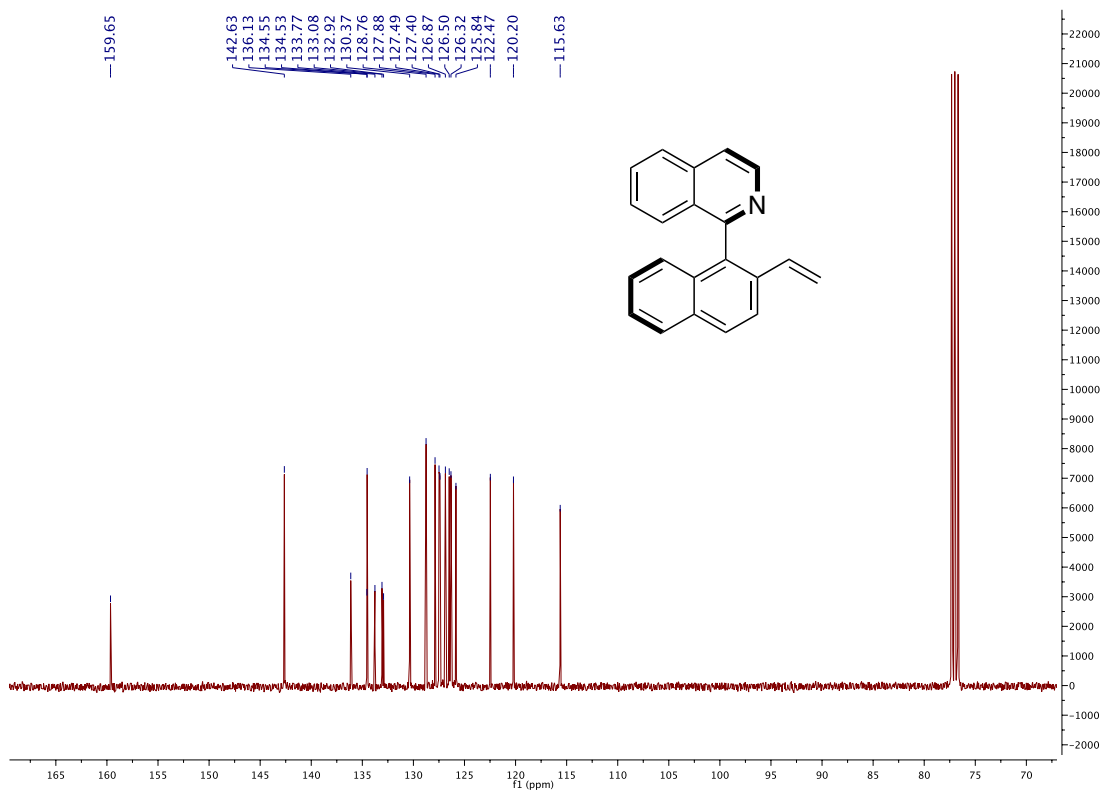

<sup>1</sup>H NMR (400 MHz, CDCl<sub>3</sub>) of 6

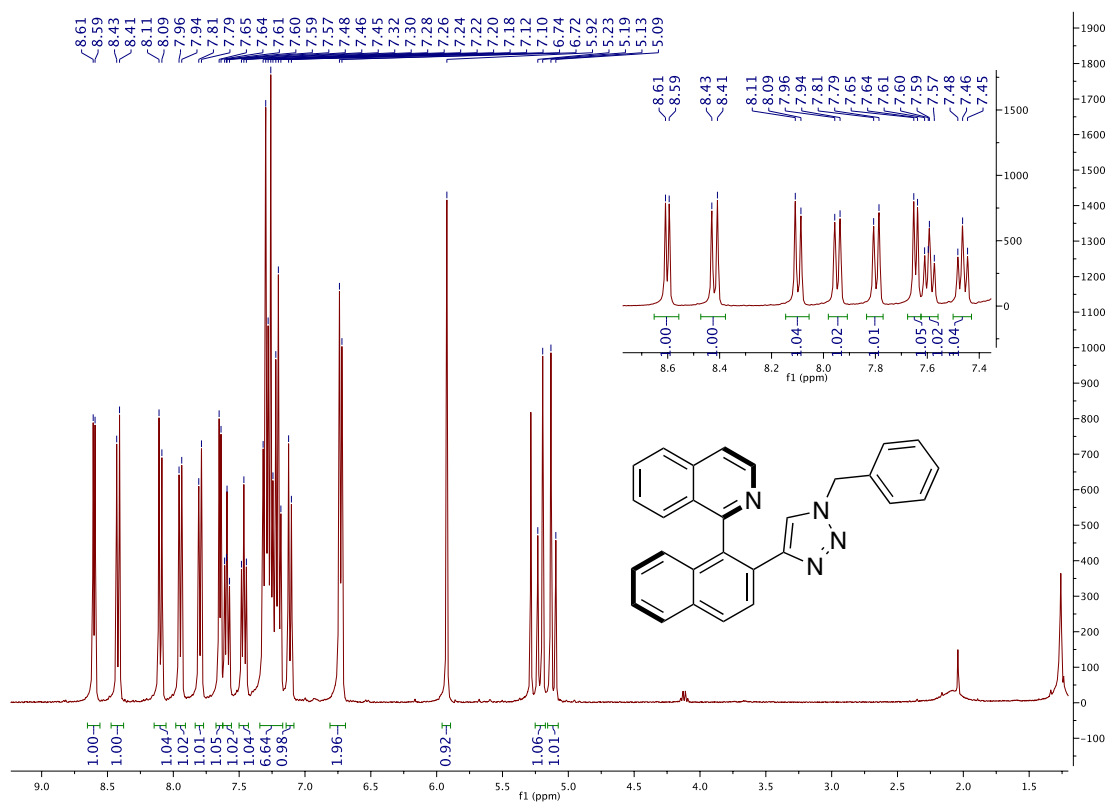

<sup>13</sup>C NMR (100 MHz, CDCl<sub>3</sub>) of 6

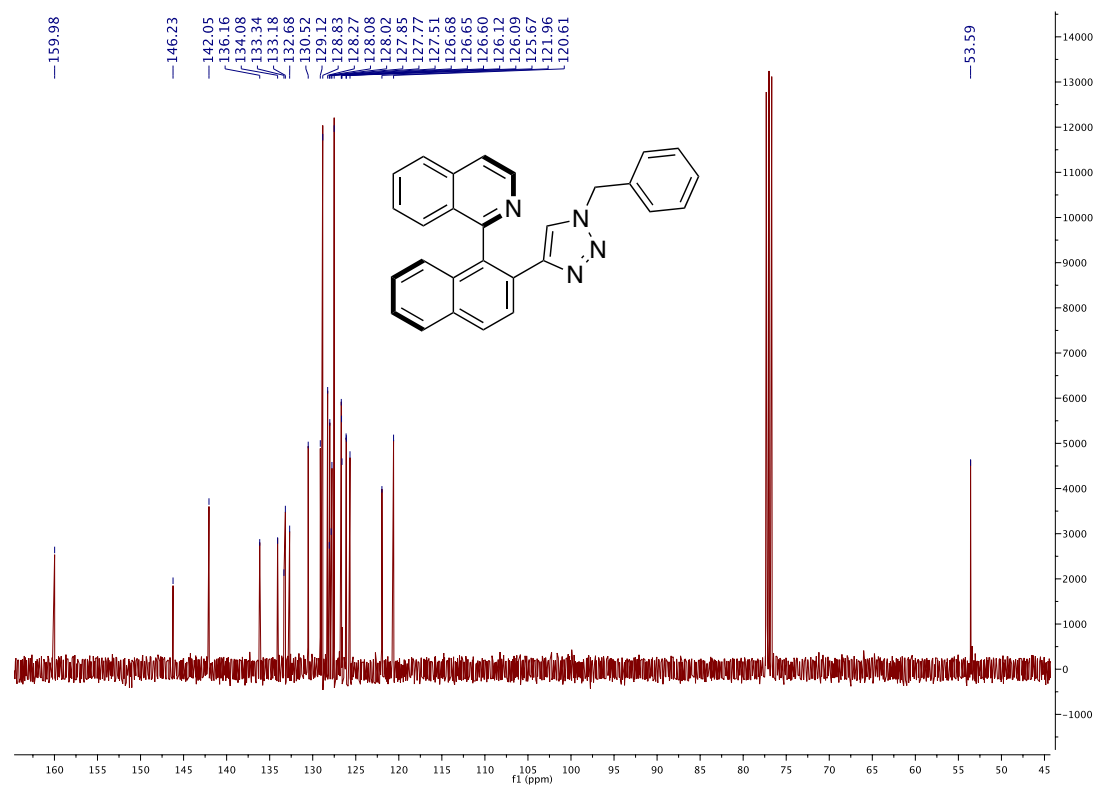

<sup>1</sup>H NMR (400 MHz, CDCl<sub>3</sub>) of 7

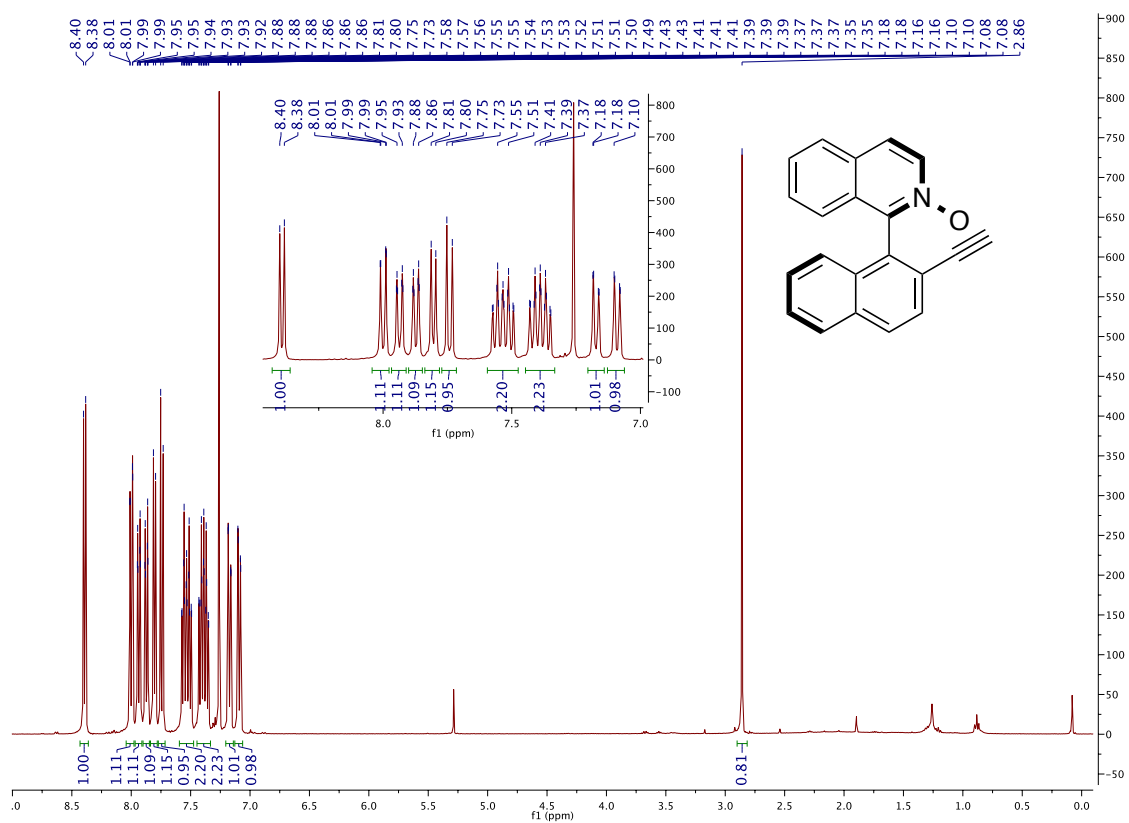

<sup>13</sup>C NMR (100 MHz, CDCl<sub>3</sub>) of 7

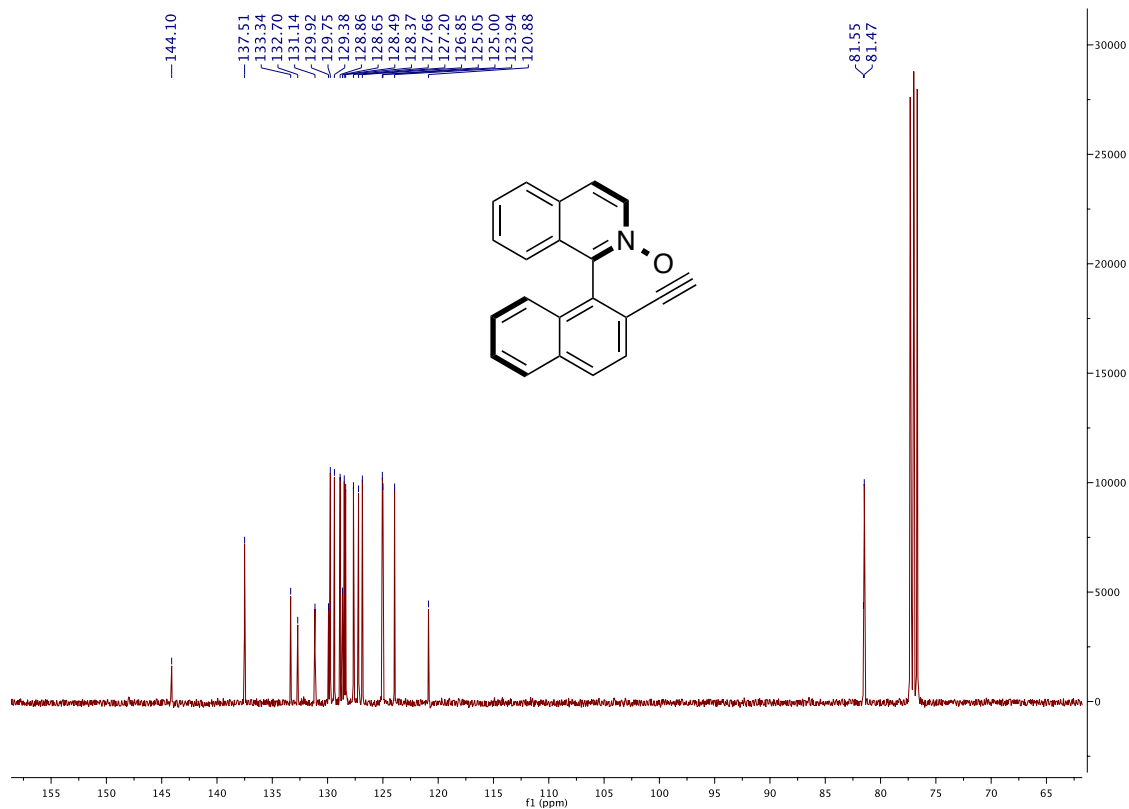

## HPLC traces

**Figure S1. Alkyne 3Aa racemic sample:** AD-H column, 85:15 *n*-Hex/*i*-PrOH, 30 °C, 1.0 mL/min

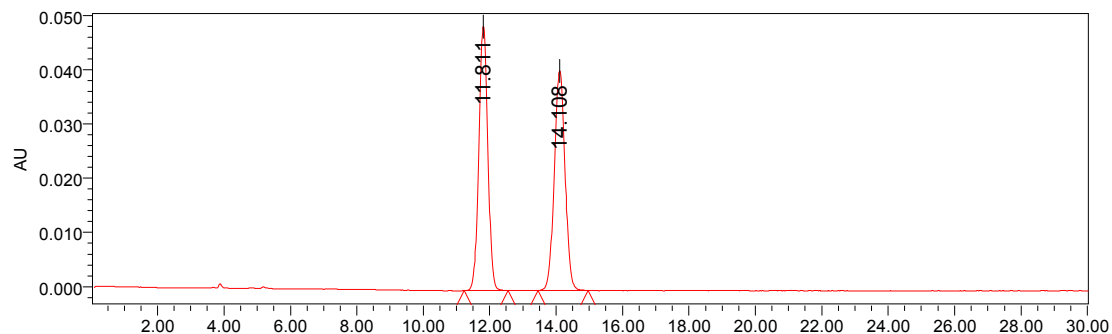

|   | Processed Channel | Retention Time (min) | Area   | % Area | Height |
|---|-------------------|----------------------|--------|--------|--------|
| 1 | PDA 276.0 nm      | 11.811               | 906877 | 49.98  | 48698  |
| 2 | PDA 276.0 nm      | 14.108               | 907703 | 50.02  | 40510  |

**Figure S2. Alkyne 3Aa enantioriched sample:** 97% ee.

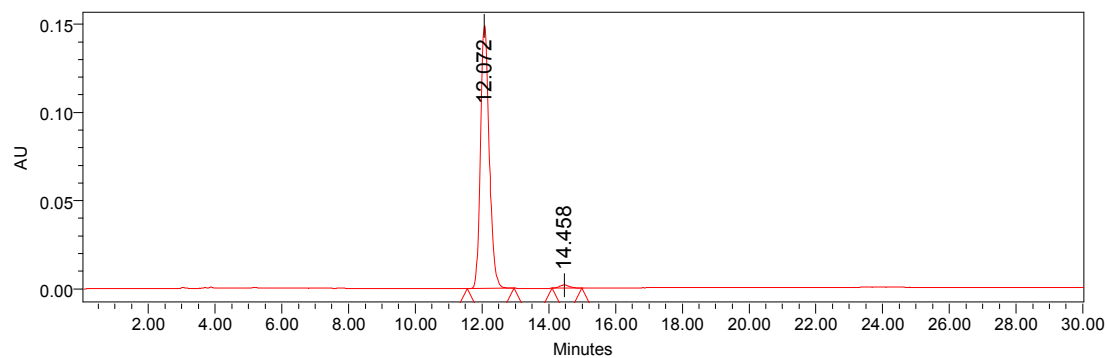

|   | Processed Channel | Retention Time (min) | Area    | % Area | Height |
|---|-------------------|----------------------|---------|--------|--------|
| 1 | PDA 276.0 nm      | 12.072               | 2702149 | 98.64  | 148987 |
| 2 | PDA 276.0 nm      | 14.458               | 37263   | 1.36   | 1792   |

**Figure S3. Alkyne 3Ab racemic sample:** AD-H column, 85:15 *n*-Hex/*i*-PrOH, 30 °C, 1.0 mL/min

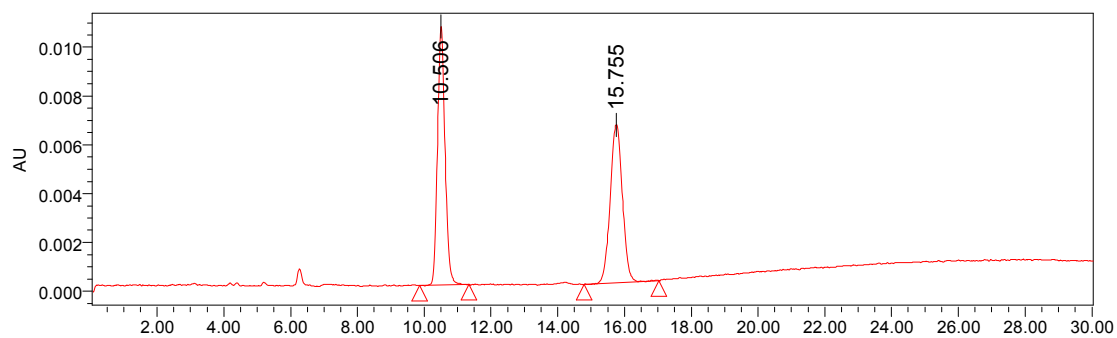

|   | Processed Channel | Retention Time (min) | Area   | % Area | Height |
|---|-------------------|----------------------|--------|--------|--------|
| 1 | PDA 347.0 nm      | 10.506               | 165944 | 50.18  | 10615  |
| 2 | PDA 347.0 nm      | 15.755               | 164779 | 49.82  | 6479   |

**Figure S4. Alkyne 3Ab enantioriched sample:** 95% ee.

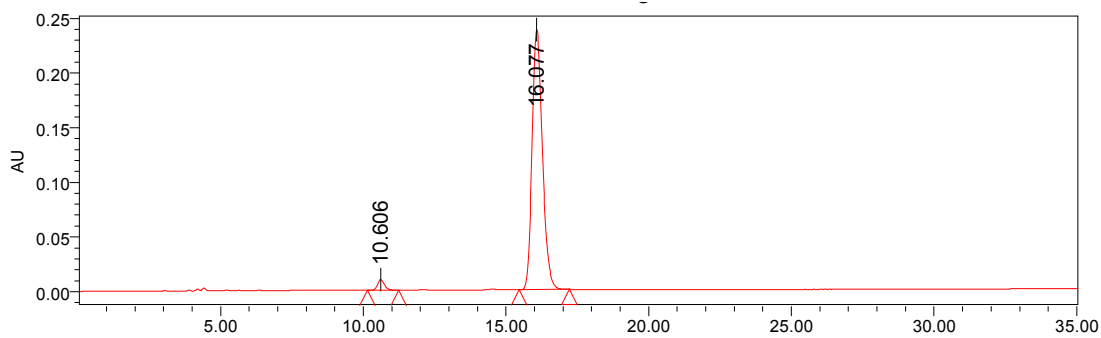

|   | Processed Channel | Retention Time (min) | Area    | % Area | Height |
|---|-------------------|----------------------|---------|--------|--------|
| 1 | PDA 283.0 nm      | 10.606               | 160187  | 2.62   | 9773   |
| 2 | PDA 283.0 nm      | 16.077               | 5954320 | 97.38  | 238432 |



**Figure S5. Alkyne 3Ac racemic sample:** AD-H column, 85:15 *n*-Hex/*i*-PrOH, 30 °C, 1.0 mL/min

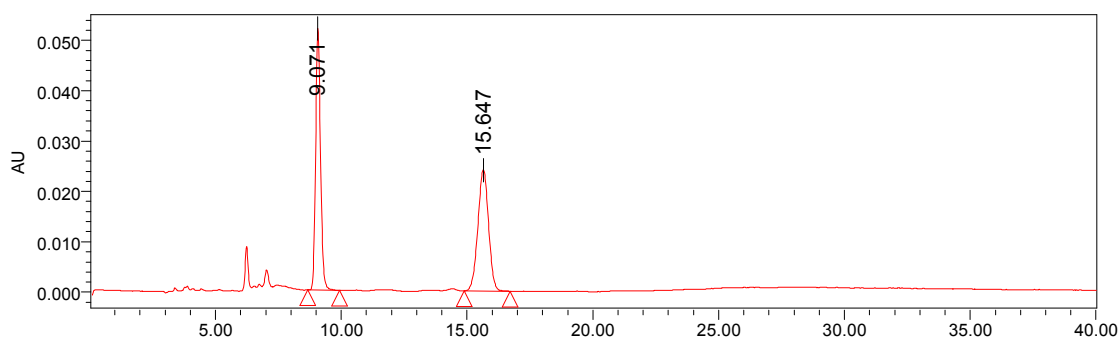

|   | Processed Channel | Retention Time (min) | Area   | % Area | Height |
|---|-------------------|----------------------|--------|--------|--------|
| 1 | PDA 285.8 nm      | 9.071                | 709669 | 49.96  | 52037  |
| 2 | PDA 285.8 nm      | 15.647               | 710786 | 50.04  | 24057  |

**Figure S6. Alkyne 3Ac enantioriched sample:** 88% ee.

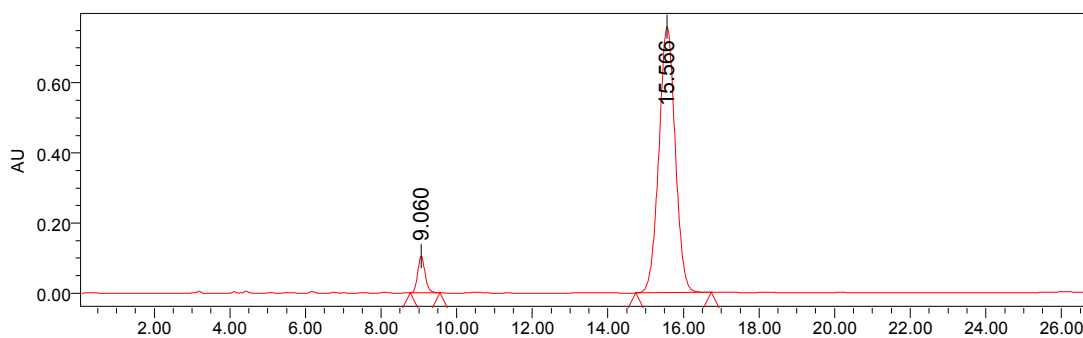

|   | Processed Channel | Retention Time (min) | Area     | % Area | Height |
|---|-------------------|----------------------|----------|--------|--------|
| 1 | PDA 217.0 nm      | 9.060                | 1412494  | 5.83   | 104619 |
| 2 | PDA 217.0 nm      | 15.566               | 22798629 | 94.17  | 759164 |

**Figure S7. Alkyne 3Ad racemic sample:** AD-H column, 80:20 *n*-Hex/*i*-PrOH, 30 °C, 1 mL/min

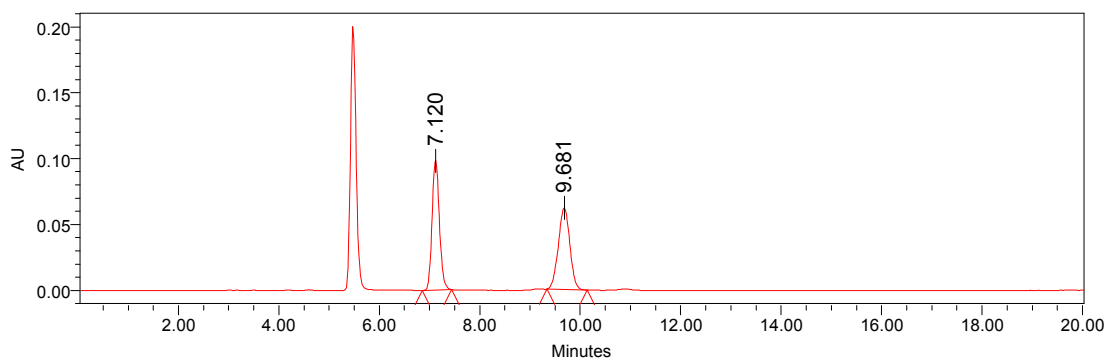

|   | Processed Channel | Retention Time (min) | Area   | % Area | Height |
|---|-------------------|----------------------|--------|--------|--------|
| 1 | PDA 266.6 nm      | 7.120                | 999686 | 50.33  | 98606  |
| 2 | PDA 266.6 nm      | 9.681                | 986740 | 49.67  | 62082  |

**Figure S8. Alkyne 3Ad enantioriched sample: 95% ee.**

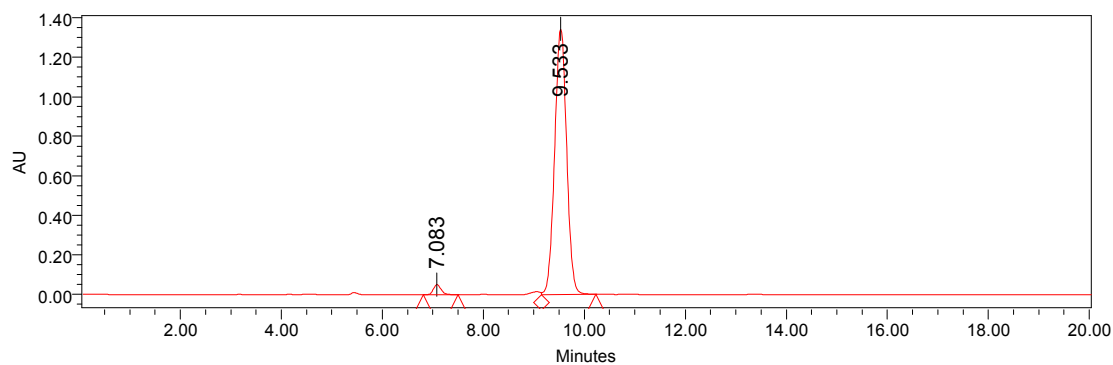

|   | Processed Channel | Retention Time (min) | Area     | % Area | Height  |
|---|-------------------|----------------------|----------|--------|---------|
| 1 | PDA 218.1 nm      | 7.083                | 532569   | 2.36   | 51143   |
| 2 | PDA 218.1 nm      | 9.533                | 22036524 | 97.64  | 1343559 |

**Figure S9. Alkyne 3Ae racemic sample:** AD-H column, 85:15 *n*-Hex/*i*-PrOH, 30 °C, 1.0 mL/min

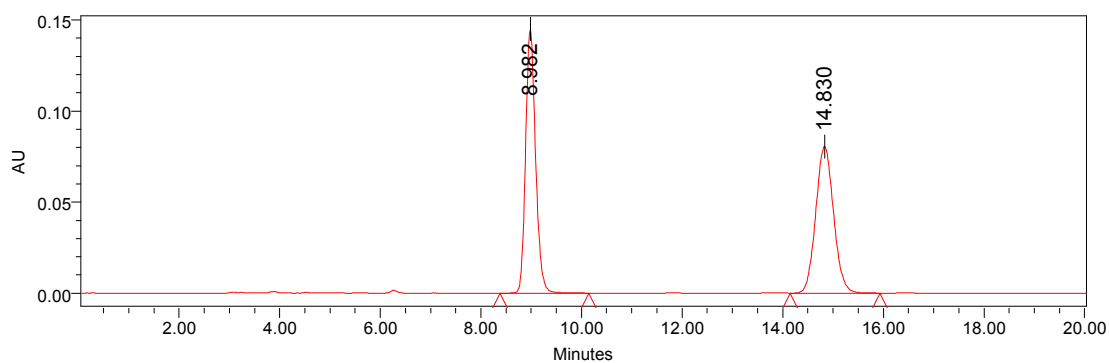

|   | Processed Channel | Retention Time (min) | Area    | % Area | Height |
|---|-------------------|----------------------|---------|--------|--------|
| 1 | PDA 279.0 nm      | 8.982                | 1986069 | 50.10  | 144938 |
| 2 | PDA 279.0 nm      | 14.830               | 1977831 | 49.90  | 80529  |

**Figure S10. Alkyne 3Ae enantioriched sample: 94% ee.**

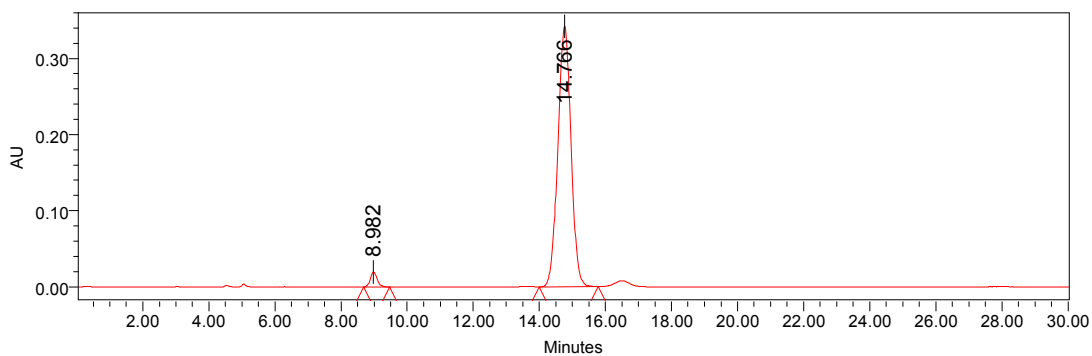

|   | Processed Channel | Retention Time (min) | Area    | % Area | Height |
|---|-------------------|----------------------|---------|--------|--------|
| 1 | PDA 279.0 nm      | 8.982                | 274783  | 2.83   | 19389  |
| 2 | PDA 279.0 nm      | 14.766               | 9432618 | 97.17  | 342624 |

**Figure S11. Alkyne 3Af racemic sample:** AD-H column, 80:20 *n*-Hex/*i*-PrOH, 30 °C, 1mL/min.

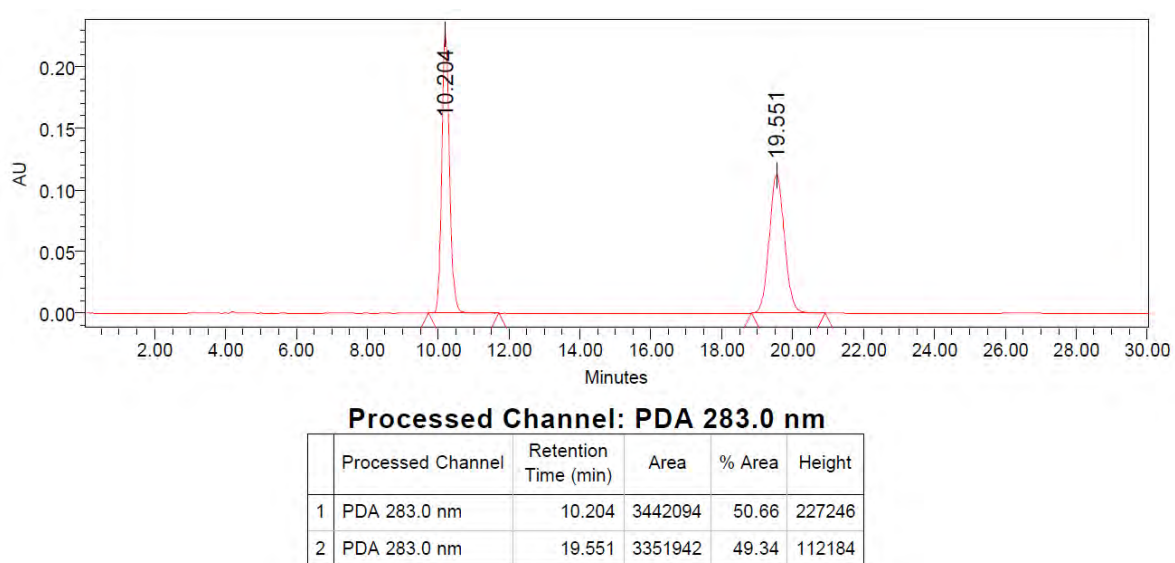

**Figure S12. Alkyne 3Af enantioriched sample:** 75% ee.

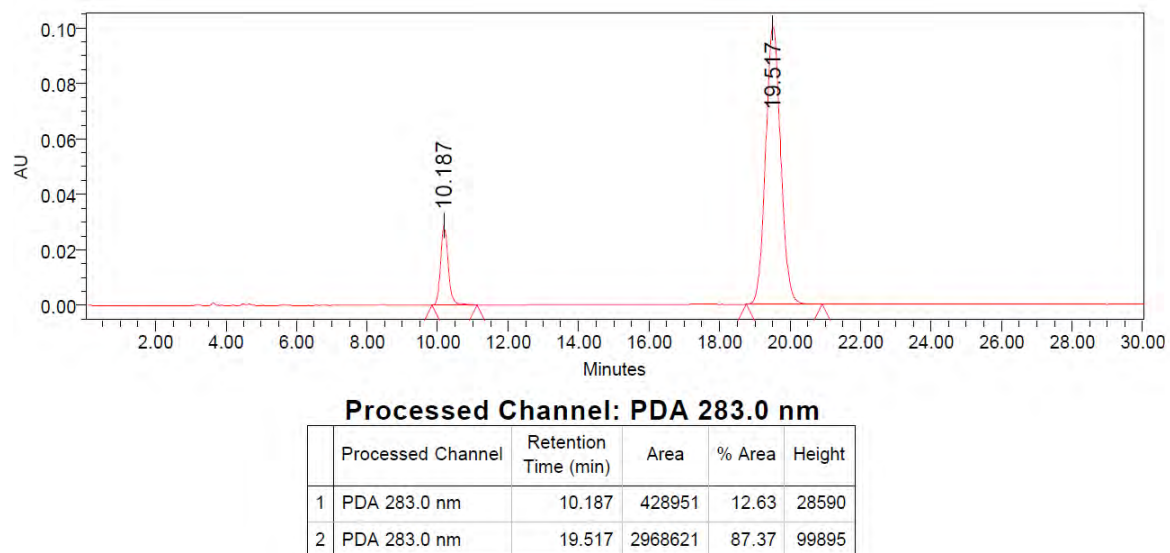

**Figure S13. Alkyne 3Ag racemic sample:** AD-H column, 80:20 *n*-Hex/*i*-PrOH, 30 °C, 1mL/min.

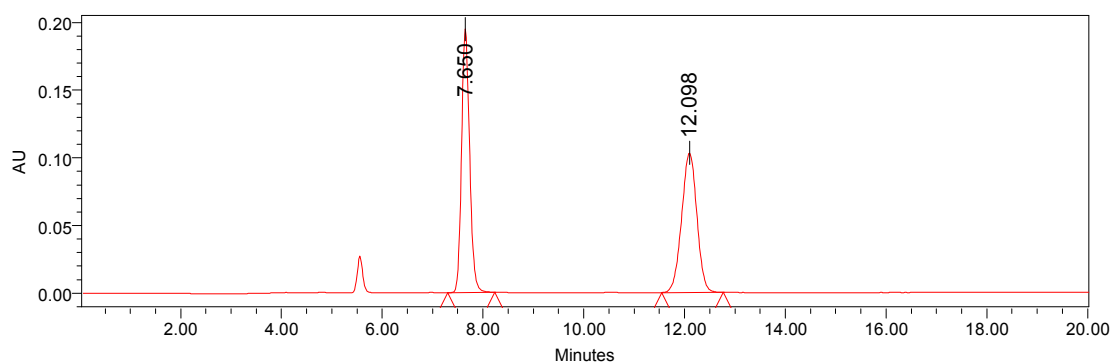

|   | Processed Channel | Retention Time (min) | Area    | % Area | Height |
|---|-------------------|----------------------|---------|--------|--------|
| 1 | PDA 327.3 nm      | 7.650                | 2156984 | 49.98  | 194853 |
| 2 | PDA 327.3 nm      | 12.098               | 2159072 | 50.02  | 103195 |

**Figure S14. Alkyne 3Ag enantioriched sample:** 91% ee.

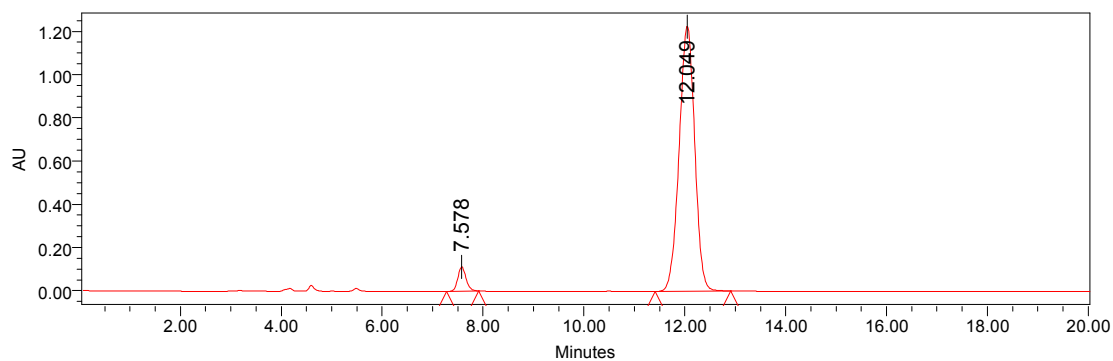

|   | Processed Channel | Retention Time (min) | Area     | % Area | Height  |
|---|-------------------|----------------------|----------|--------|---------|
| 1 | PDA 216.0 nm      | 7.578                | 1259550  | 4.58   | 112724  |
| 2 | PDA 216.0 nm      | 12.049               | 26214642 | 95.42  | 1227137 |

**Figure S15. Alkyne 3Ah racemic sample:** AD-H column, 80:20 *n*-Hex/*i*-PrOH, 30 °C, 1 mL/min

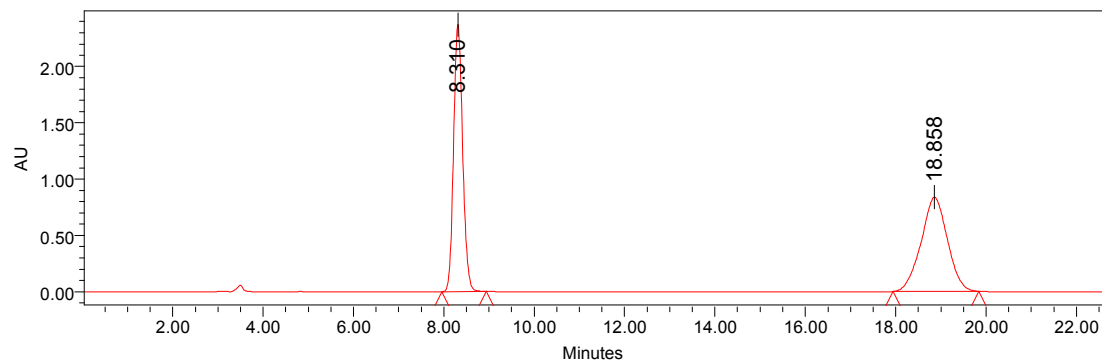

|   | Processed Channel | Retention Time (min) | Area     | % Area | Height  |
|---|-------------------|----------------------|----------|--------|---------|
| 1 | PDA 216.0 nm      | 8.310                | 33248136 | 49.61  | 2374737 |
| 2 | PDA 216.0 nm      | 18.858               | 33773991 | 50.39  | 836482  |

**Figure S16. Alkyne 3Ah enantioriched sample: 92% ee.**

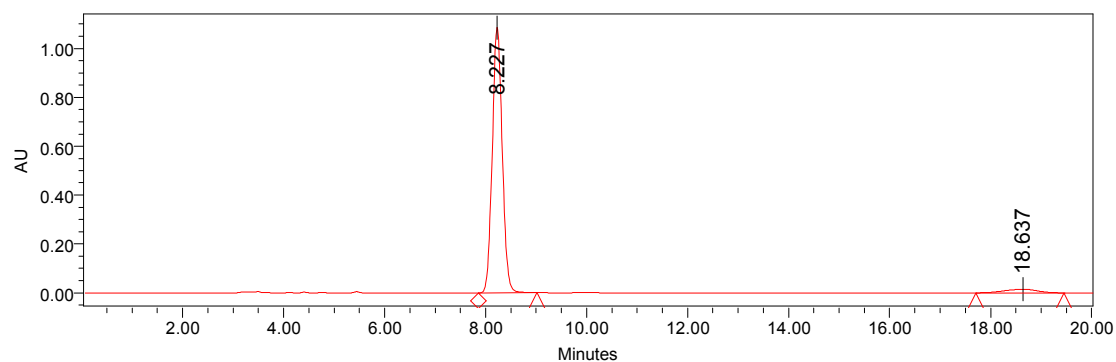

|   | Processed Channel | Retention Time (min) | Area     | % Area | Height  |
|---|-------------------|----------------------|----------|--------|---------|
| 1 | PDA 217.0 nm      | 8.227                | 14884286 | 95.89  | 1088553 |
| 2 | PDA 217.0 nm      | 18.637               | 637476   | 4.11   | 14732   |

**Figure S17. Alkyne 3Ai racemic sample:** AD-H column, 80:20 *n*-Hex/*i*-PrOH, 30 °C, 1 mL/min

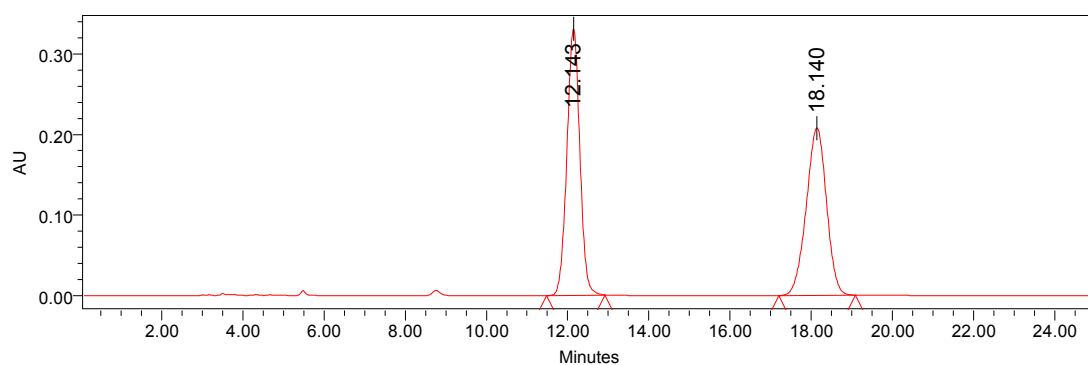

|   | Processed Channel | Retention Time (min) | Area    | % Area | Height |
|---|-------------------|----------------------|---------|--------|--------|
| 1 | PDA 234.2 nm      | 12.143               | 7290186 | 50.33  | 331462 |
| 2 | PDA 234.2 nm      | 18.140               | 7195899 | 49.67  | 207897 |

**Figure S18. Alkyne 3Ai enantioriched sample: 94% ee.**

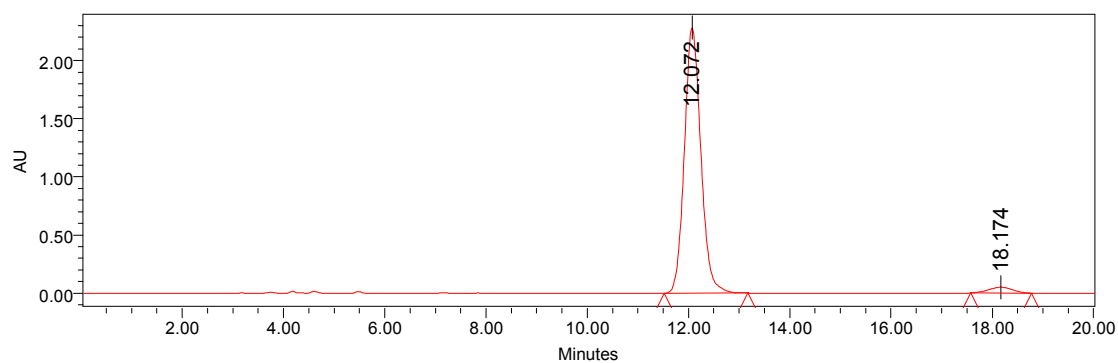

|   | Processed Channel | Retention Time (min) | Area     | % Area | Height  |
|---|-------------------|----------------------|----------|--------|---------|
| 1 | PDA 219.0 nm      | 12.072               | 51501913 | 96.98  | 2282808 |
| 2 | PDA 219.0 nm      | 18.174               | 1601344  | 3.02   | 49056   |

**Figure S19. Alkyne 3Aj racemic sample:** AD-H column, 80:20 *n*-Hex/*i*-PrOH, 30 °C, 1 mL/min

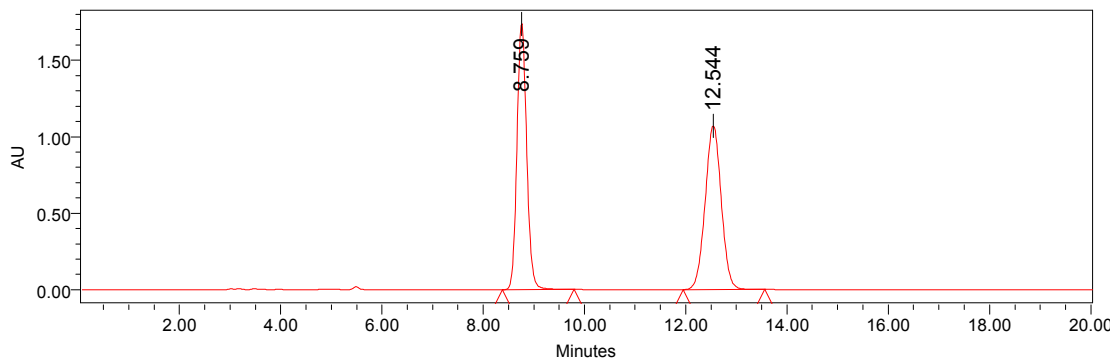

|   | Processed Channel | Retention Time (min) | Area     | % Area | Height  |
|---|-------------------|----------------------|----------|--------|---------|
| 1 | PDA 209.7 nm      | 8.759                | 23207477 | 49.58  | 1740744 |
| 2 | PDA 209.7 nm      | 12.544               | 23599870 | 50.42  | 1070478 |

**Figure S20. Alkyne 3Aj enantioriched sample: 94% ee.**

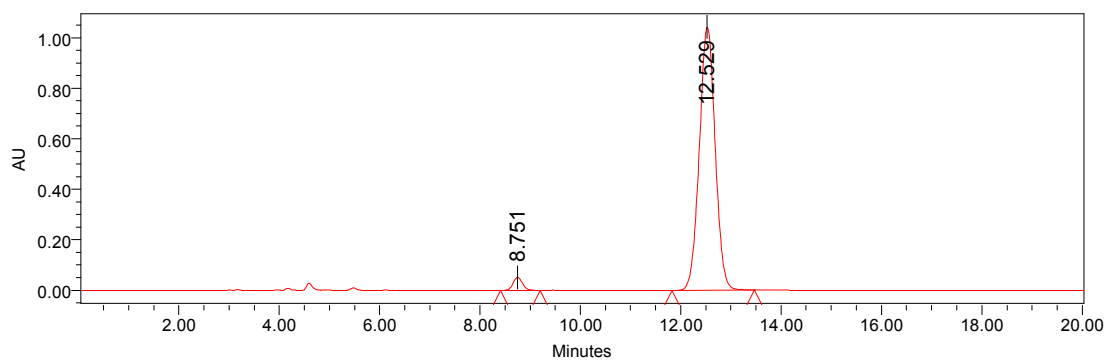

|   | Processed Channel | Retention Time (min) | Area     | % Area | Height  |
|---|-------------------|----------------------|----------|--------|---------|
| 1 | PDA 219.1 nm      | 8.751                | 673023   | 2.86   | 51754   |
| 2 | PDA 219.1 nm      | 12.529               | 22825570 | 97.14  | 1042832 |



**Figure S21. Alkyne 3Ak racemic sample:** AD-H column, 85:15 *n*-Hex/*i*-PrOH, 30 °C, 1.0 mL/min

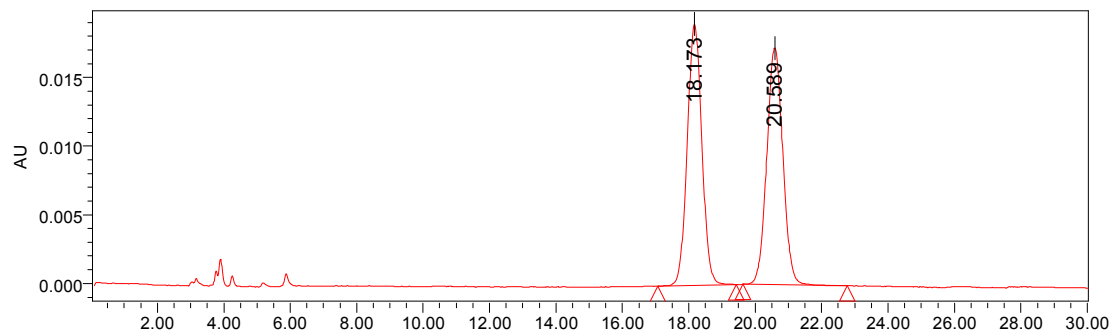

|   | Processed Channel | Retention Time (min) | Area   | % Area | Height |
|---|-------------------|----------------------|--------|--------|--------|
| 1 | PDA 247.5 nm      | 18.173               | 579802 | 49.99  | 19027  |
| 2 | PDA 247.5 nm      | 20.589               | 580104 | 50.01  | 17231  |

**Figure S22. Alkyne 3Ak enantioriched sample:** 89% ee.

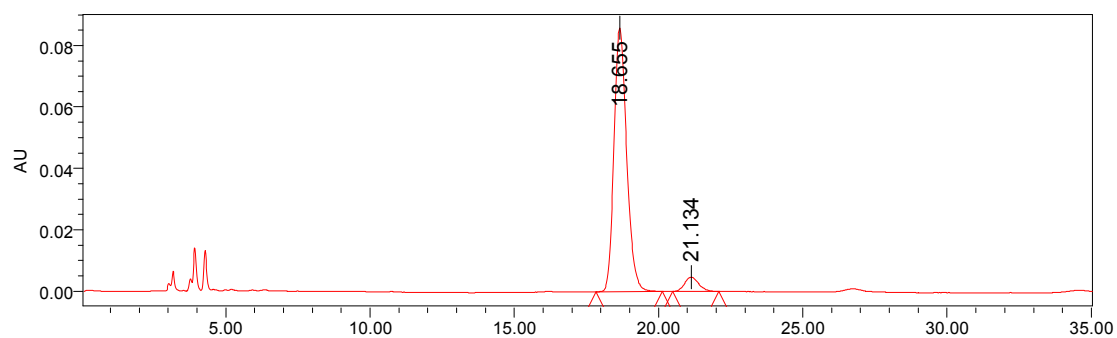

|   | Processed Channel | Retention Time (min) | Area    | % Area | Height |
|---|-------------------|----------------------|---------|--------|--------|
| 1 | PDA 217.0 nm      | 18.655               | 2620882 | 94.38  | 85951  |
| 2 | PDA 217.0 nm      | 21.134               | 155990  | 5.62   | 4651   |

**Figure S23. Alkyne 3Al racemic sample:** AD-H column, 85:15 *n*-Hex/*i*-PrOH, 30 °C, 1.0 mL/min

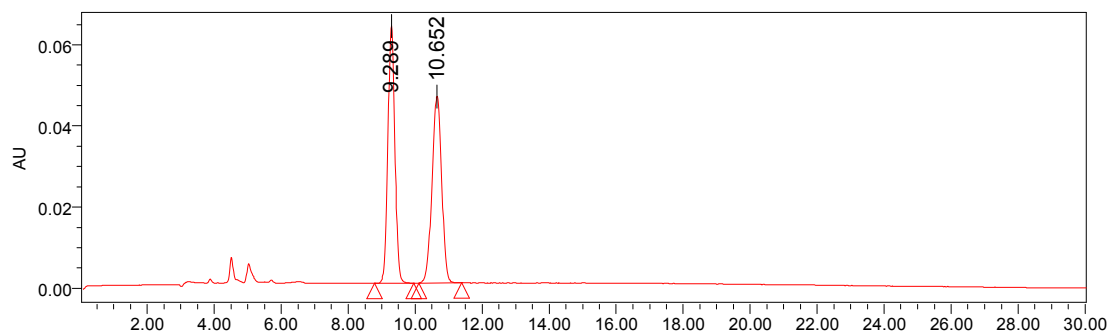

|   | Processed Channel | Retention Time (min) | Area   | % Area | Height |
|---|-------------------|----------------------|--------|--------|--------|
| 1 | PDA 272.0 nm      | 9.289                | 923642 | 50.06  | 63485  |
| 2 | PDA 272.0 nm      | 10.652               | 921435 | 49.94  | 46024  |

**Figure S24. Alkyne 3Al enantioriched sample: 98% ee.**

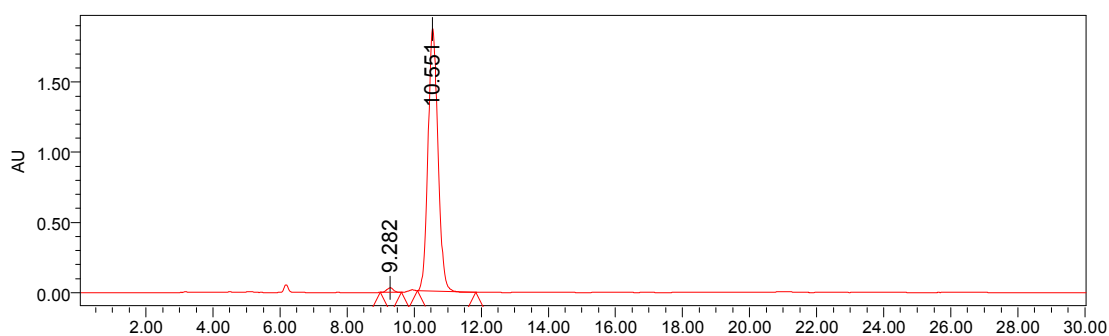

|   | Processed Channel | Retention Time (min) | Area     | % Area | Height  |
|---|-------------------|----------------------|----------|--------|---------|
| 1 | PDA 217.0 nm      | 9.282                | 468260   | 1.20   | 33476   |
| 2 | PDA 217.0 nm      | 10.551               | 38451775 | 98.80  | 1872580 |

**Figure S25. Alkyne 3Am racemic sample:** AD-H column, 85:15 *n*-Hex/*i*-PrOH, 30 °C, 1.0 mL/min

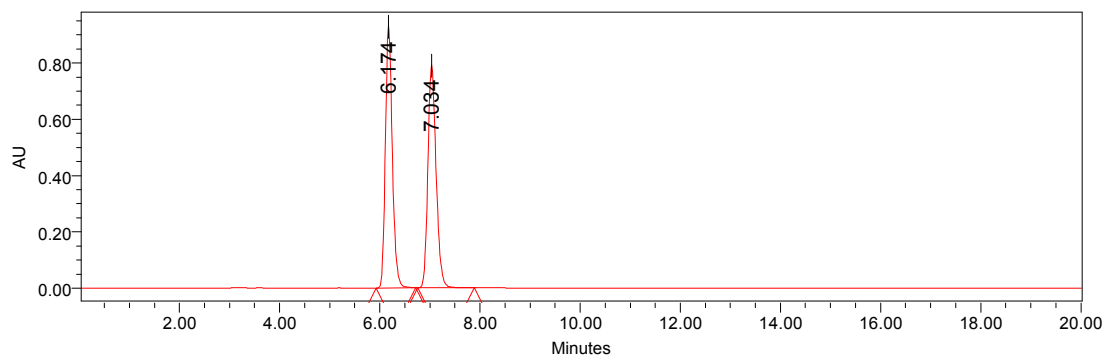

|   | Processed Channel | Retention Time (min) | Area    | % Area | Height |
|---|-------------------|----------------------|---------|--------|--------|
| 1 | PDA 252.0 nm      | 6.174                | 9018972 | 49.94  | 933772 |
| 2 | PDA 252.0 nm      | 7.034                | 9040391 | 50.06  | 790739 |

**Figure S26. Alkyne 3Am enantioriched sample: 96% ee.**

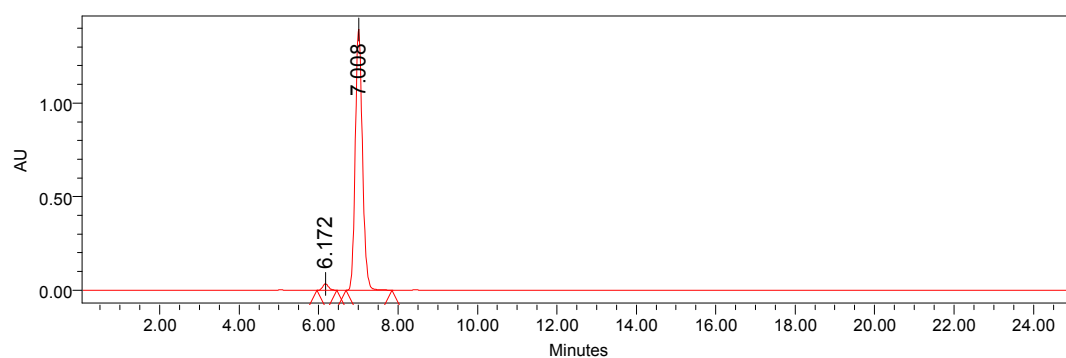

|   | Processed Channel | Retention Time (min) | Area     | % Area | Height  |
|---|-------------------|----------------------|----------|--------|---------|
| 1 | PDA 252.0 nm      | 6.172                | 344229   | 1.96   | 34707   |
| 2 | PDA 252.0 nm      | 7.008                | 17262551 | 98.04  | 1396151 |

**Figure S27. Alkyne 3An racemic sample:** AD-H column, 85:15 *n*-Hex/*i*-PrOH, 30 °C, 1.0 mL/min

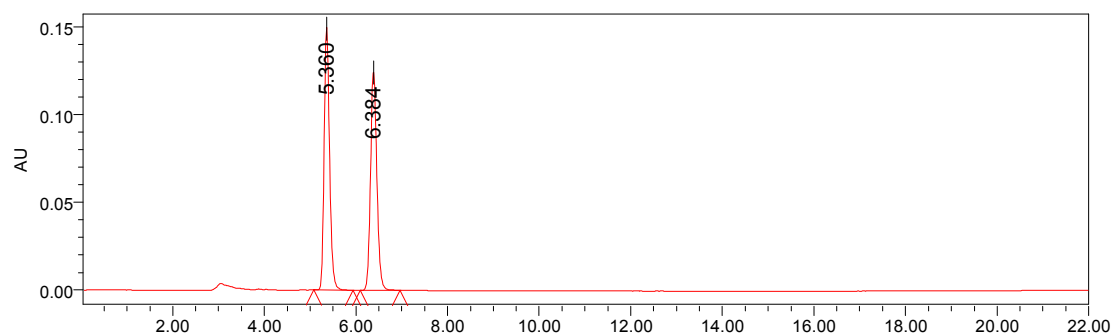

|   | Processed Channel | Retention Time (min) | Area    | % Area | Height |
|---|-------------------|----------------------|---------|--------|--------|
| 1 | PDA 251.0 nm      | 5.360                | 1213614 | 50.01  | 149394 |
| 2 | PDA 251.0 nm      | 6.384                | 1213339 | 49.99  | 124876 |

**Figure S28. Alkyne 3An enantioriched sample:** 96% ee.

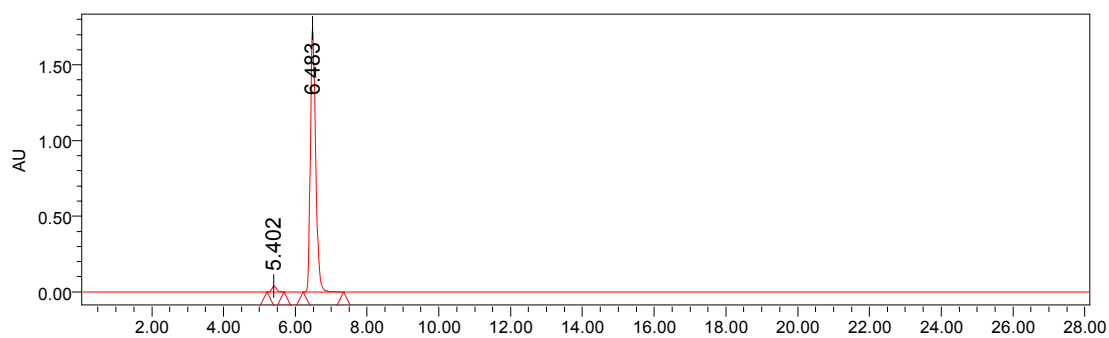

|   | Processed Channel | Retention Time (min) | Area     | % Area | Height  |
|---|-------------------|----------------------|----------|--------|---------|
| 1 | PDA 251.0 nm      | 5.402                | 335386   | 1.85   | 39969   |
| 2 | PDA 251.0 nm      | 6.483                | 17841815 | 98.15  | 1744935 |

**Figure S29. Alkyne 3Ao racemic sample:** AD-H column, 85:15 *n*-Hex/*i*-PrOH, 30 °C, 1.0 mL/min

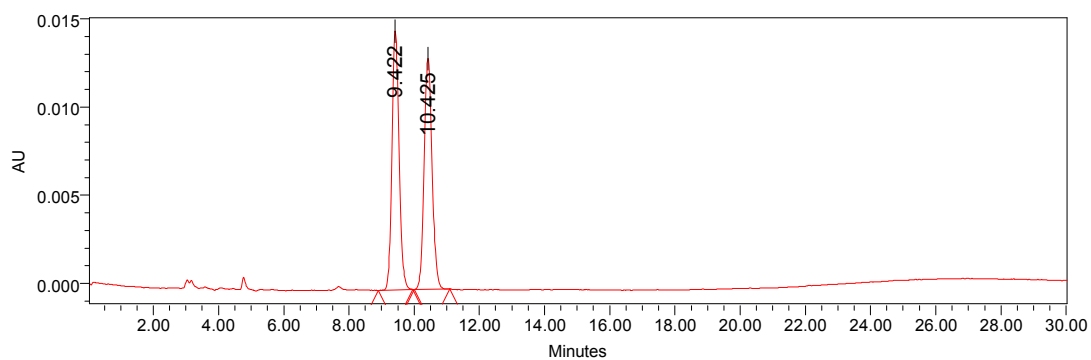

|   | Processed Channel | Retention Time (min) | Area   | % Area | Height |
|---|-------------------|----------------------|--------|--------|--------|
| 1 | PDA 249.0 nm      | 9.422                | 221133 | 50.07  | 14691  |
| 2 | PDA 249.0 nm      | 10.425               | 220552 | 49.93  | 13094  |

**Figure S30. Alkyne 3Ao enantioriched sample: 96% ee.**

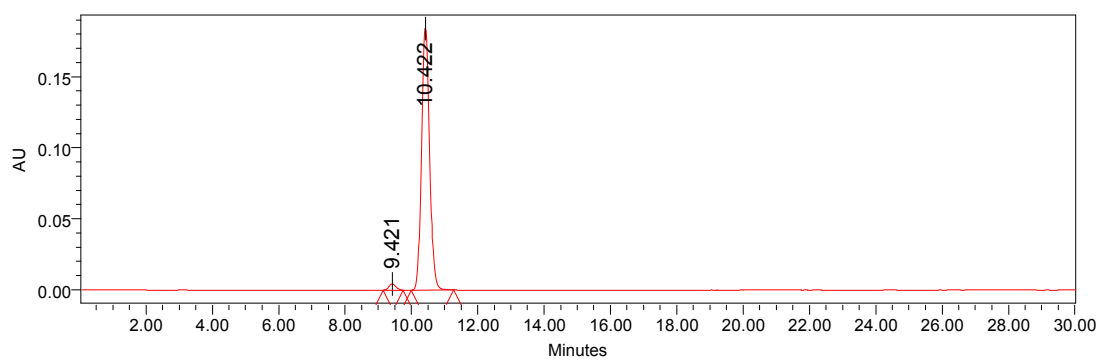

|   | Processed Channel | Retention Time (min) | Area    | % Area | Height |
|---|-------------------|----------------------|---------|--------|--------|
| 1 | PDA 249.0 nm      | 9.421                | 62174   | 1.97   | 4292   |
| 2 | PDA 249.0 nm      | 10.422               | 3088521 | 98.03  | 184406 |

**Figure S31. Alkyne 3Ap diast 1 enantioriched sample: 97% ee. HPLC (AD-H column, 85:15 *n*-Hex/*i*-PrOH, 30 °C, 1 mL/min)**

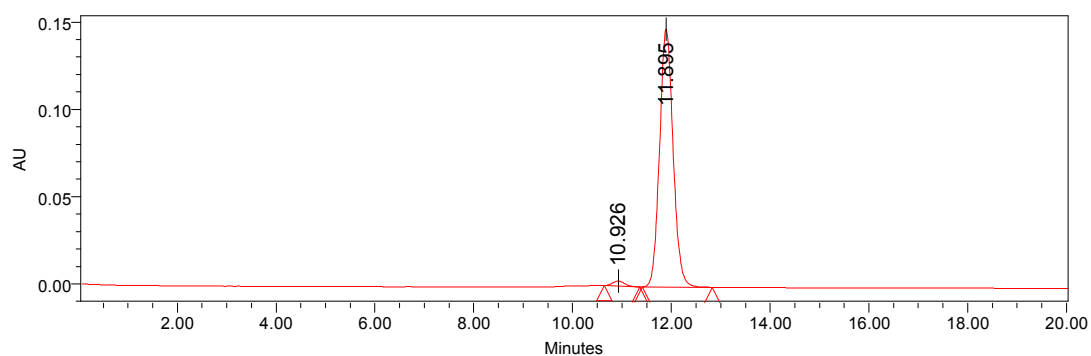

|   | Processed Channel | Retention Time (min) | Area    | % Area | Height |
|---|-------------------|----------------------|---------|--------|--------|
| 1 | PDA 250.0 nm      | 10.926               | 46929   | 1.65   | 2858   |
| 2 | PDA 250.0 nm      | 11.895               | 2805772 | 98.35  | 147812 |

**Figure S32. Alkyne 3Ap diast 2 enantioriched sample: 97% ee. HPLC (AD-H column, 85:15 *n*-Hex/*i*-PrOH, 30 °C, 1 mL/min)**

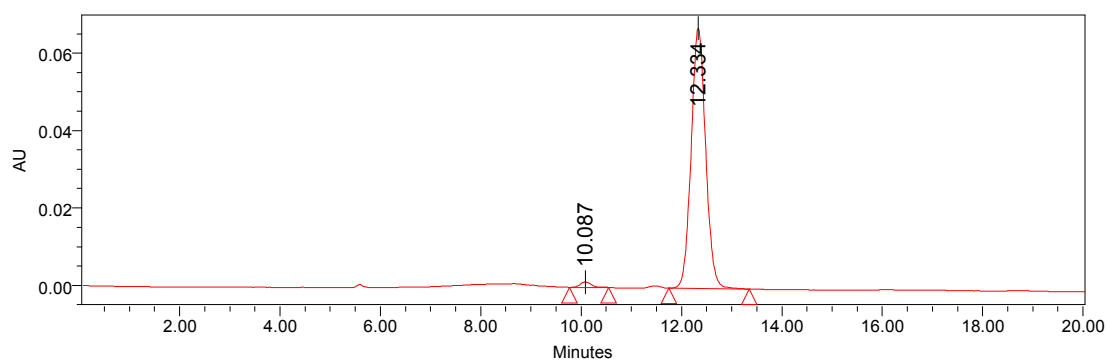

|   | Processed Channel | Retention Time (min) | Area    | % Area | Height |
|---|-------------------|----------------------|---------|--------|--------|
| 1 | PDA 250.0 nm      | 10.087               | 22264   | 1.62   | 1415   |
| 2 | PDA 250.0 nm      | 12.334               | 1351374 | 98.38  | 67255  |

**Figure S33. Alkyne 3Aq racemic sample:** AD-H column, 85:15 *n*-Hex/*i*-PrOH, 30 °C, 1.0 mL/min

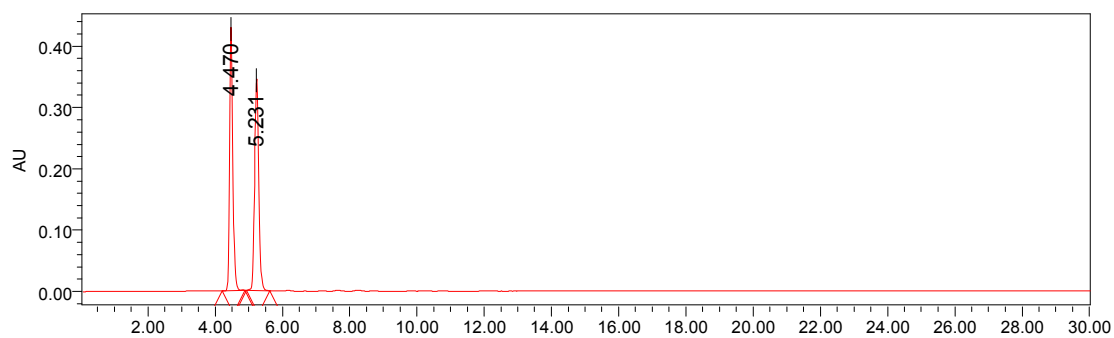

|   | Processed Channel | Retention Time (min) | Area    | % Area | Height |
|---|-------------------|----------------------|---------|--------|--------|
| 1 | PDA 254.0 nm      | 4.470                | 2954809 | 50.04  | 428271 |
| 2 | PDA 254.0 nm      | 5.231                | 2949713 | 49.96  | 345223 |

**Figure S34. Alkyne 3Aq enantioriched sample:** 97% ee.

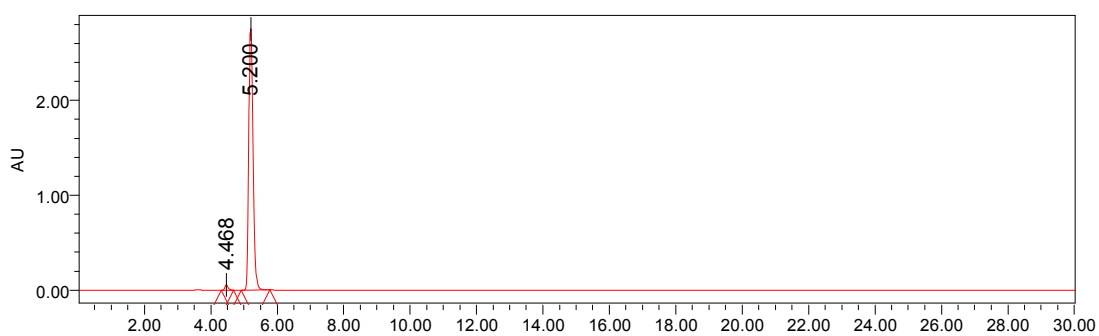

|   | Processed Channel | Retention Time (min) | Area     | % Area | Height  |
|---|-------------------|----------------------|----------|--------|---------|
| 1 | PDA 254.0 nm      | 4.468                | 371258   | 1.49   | 54874   |
| 2 | PDA 254.0 nm      | 5.200                | 24600298 | 98.51  | 2754563 |

**Figure S35. Alkyne 3Ba racemic sample:** IA column, 85:15 *n*-Hex/*i*-PrOH, 30 °C, 1.0 mL/min

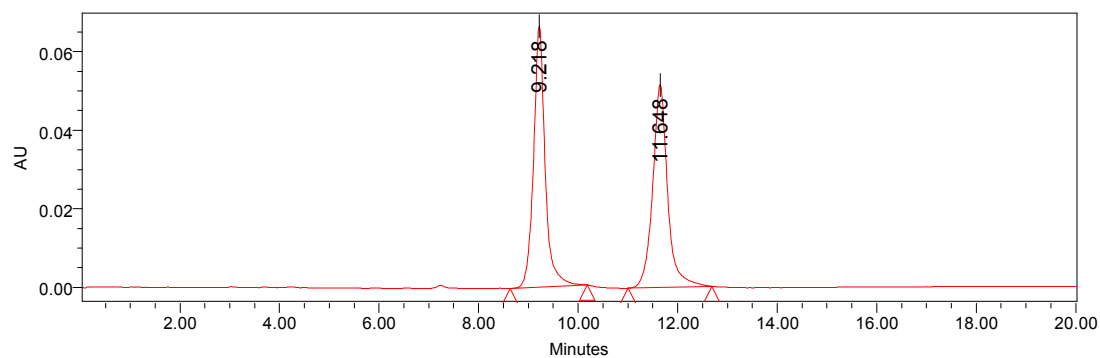

|   | Processed Channel | Retention Time (min) | Area    | % Area | Height |
|---|-------------------|----------------------|---------|--------|--------|
| 1 | PDA 276.0 nm      | 9.218                | 1073105 | 49.99  | 66333  |
| 2 | PDA 276.0 nm      | 11.648               | 1073432 | 50.01  | 51568  |

**Figure S36. Alkyne 3Ba enantioriched sample: 98% ee.**

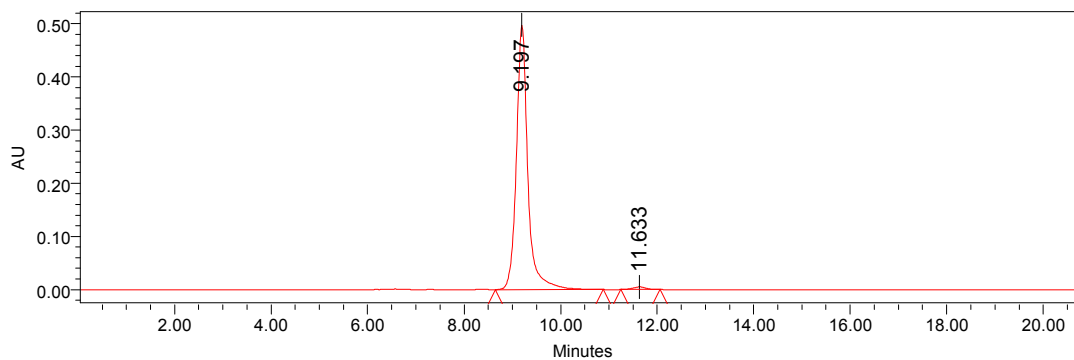

|   | Processed Channel | Retention Time (min) | Area    | % Area | Height |
|---|-------------------|----------------------|---------|--------|--------|
| 1 | PDA 276.0 nm      | 9.197                | 8139837 | 98.92  | 497545 |
| 2 | PDA 276.0 nm      | 11.633               | 88778   | 1.08   | 4813   |



**Figure S37. Alkyne 3Bn racemic sample:** OJ-H column, 85:15 *n*-Hex/*i*-PrOH, 30 °C, 1.0 mL/min

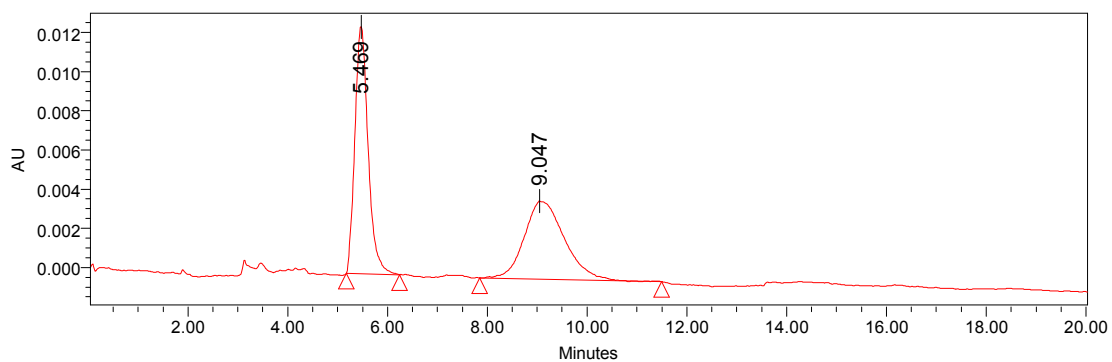

|   | Processed Channel | Retention Time (min) | Area   | % Area | Height |
|---|-------------------|----------------------|--------|--------|--------|
| 1 | PDA 246.0 nm      | 5.469                | 232432 | 50.89  | 12632  |
| 2 | PDA 246.0 nm      | 9.047                | 224288 | 49.11  | 3993   |

**Figure S38. Alkyne 3Bn enantioriched sample:** 97% ee.

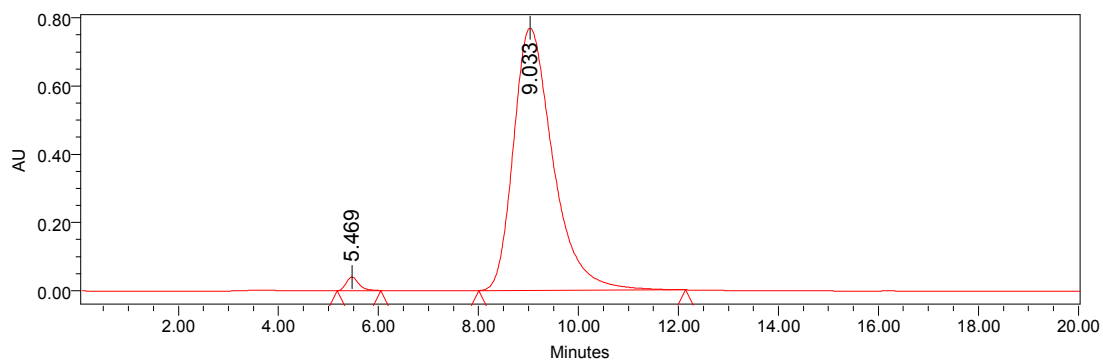

|   | Processed Channel | Retention Time (min) | Area     | % Area | Height |
|---|-------------------|----------------------|----------|--------|--------|
| 1 | PDA 246.0 nm      | 5.469                | 697040   | 1.62   | 39884  |
| 2 | PDA 246.0 nm      | 9.033                | 42324243 | 98.38  | 769914 |

**Figure S39. Alkyne 3Bq racemic sample:** IA column, 90:10 *n*-Hex/*i*-PrOH, 30 °C, 1 mL/min

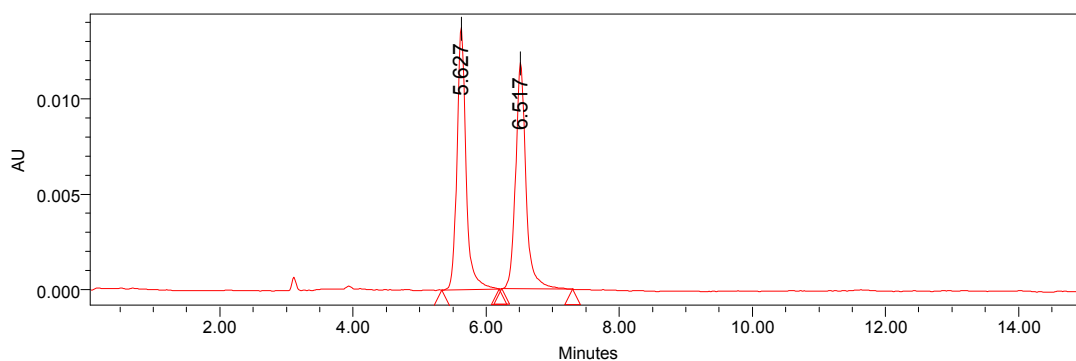

|   | Processed Channel | Retention Time (min) | Area   | % Area | Height |
|---|-------------------|----------------------|--------|--------|--------|
| 1 | PDA 255.4 nm      | 5.627                | 129421 | 50.28  | 13746  |
| 2 | PDA 255.4 nm      | 6.517                | 128004 | 49.72  | 11845  |

**Figure S40. Alkyne 3Bq enantioriched sample: 96% ee.**

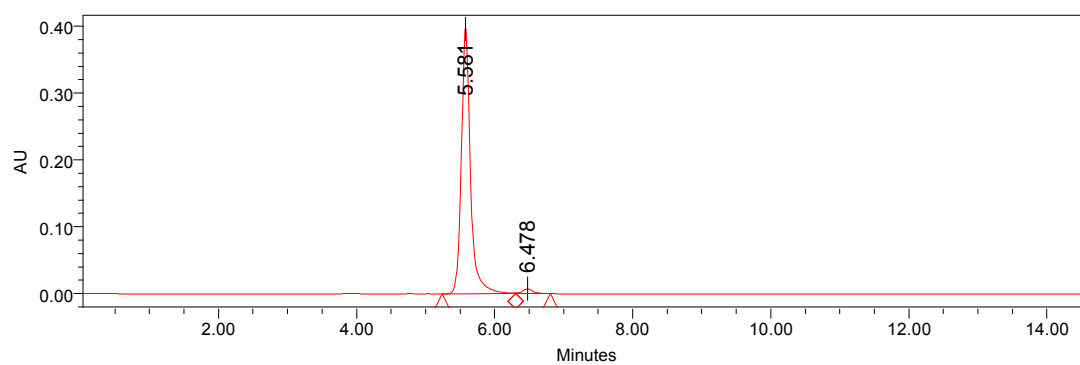

|   | Processed Channel | Retention Time (min) | Area    | % Area | Height |
|---|-------------------|----------------------|---------|--------|--------|
| 1 | PDA 254.0 nm      | 5.581                | 3670945 | 97.94  | 398914 |
| 2 | PDA 254.0 nm      | 6.478                | 77268   | 2.06   | 7429   |

**Figure S41. Alkyne 3Ca racemic sample:** IA column, *n*-Hex/*i*-PrOH 85:15, 30 °C, 1.0 mL/min

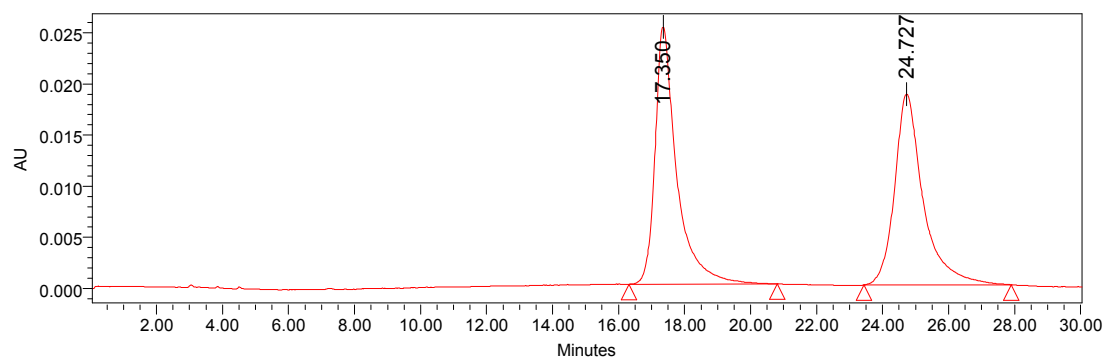

|   | Processed Channel | Retention Time (min) | Area    | % Area | Height |
|---|-------------------|----------------------|---------|--------|--------|
| 1 | PDA 275.0 nm      | 17.350               | 1143709 | 50.49  | 25157  |
| 2 | PDA 275.0 nm      | 24.727               | 1121650 | 49.51  | 18650  |

**Figure S42. Alkyne 3Ca enantioriched sample: 94% ee.**

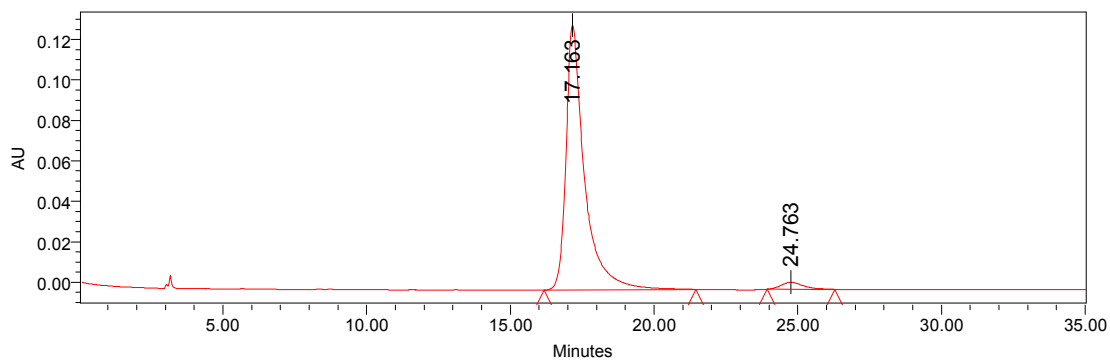

|   | Processed Channel | Retention Time (min) | Area    | % Area | Height |
|---|-------------------|----------------------|---------|--------|--------|
| 1 | PDA 218.0 nm      | 17.163               | 5849676 | 96.87  | 130855 |
| 2 | PDA 218.0 nm      | 24.763               | 188871  | 3.13   | 3514   |

**Figure S43. Alkyne 3Cn racemic sample:** AD-H column, 85:15 *n*-Hex/*i*-PrOH, 30 °C, 1.0 mL/min

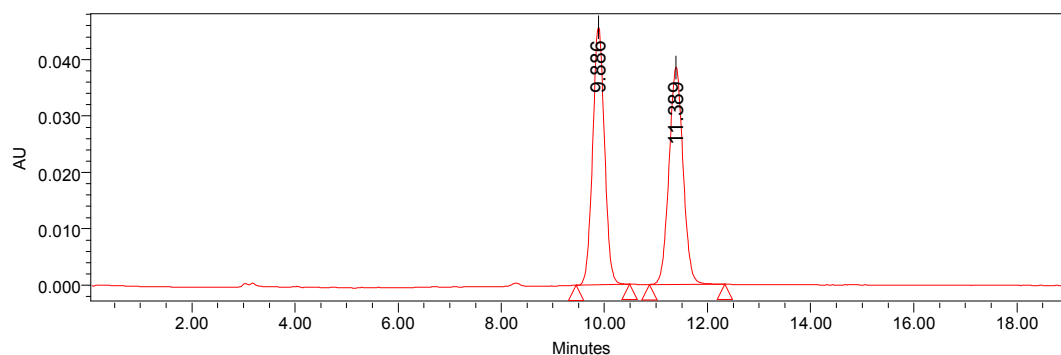

|   | Processed Channel | Retention Time (min) | Area   | % Area | Height |
|---|-------------------|----------------------|--------|--------|--------|
| 1 | PDA 246.0 nm      | 9.886                | 727056 | 49.93  | 45722  |
| 2 | PDA 246.0 nm      | 11.389               | 729218 | 50.07  | 38501  |

**Figure S44. Alkyne 3Cn enantioriched sample: 93% ee.**

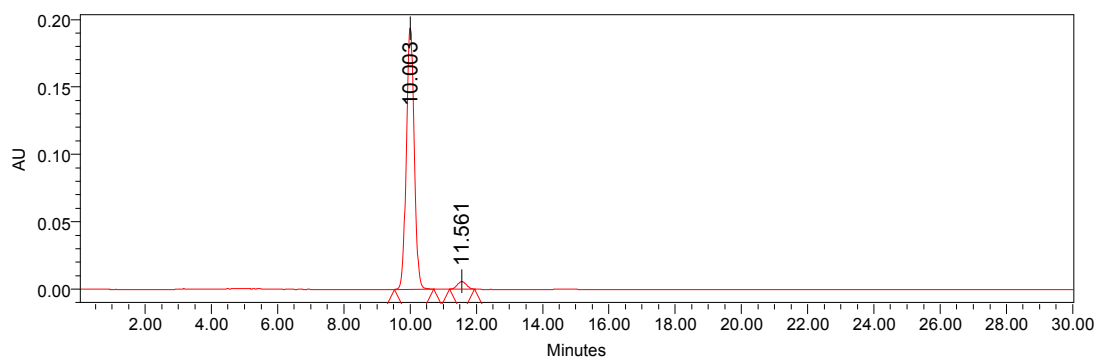

|   | Processed Channel | Retention Time (min) | Area    | % Area | Height |
|---|-------------------|----------------------|---------|--------|--------|
| 1 | PDA 246.0 nm      | 10.003               | 3188608 | 96.72  | 194218 |
| 2 | PDA 246.0 nm      | 11.561               | 108008  | 3.28   | 5736   |

**Figure S45. Alkyne 3Cq racemic sample:** AD-H column, 90:10 *n*-Hex/*i*-PrOH, 30 °C, 1.0 mL/min

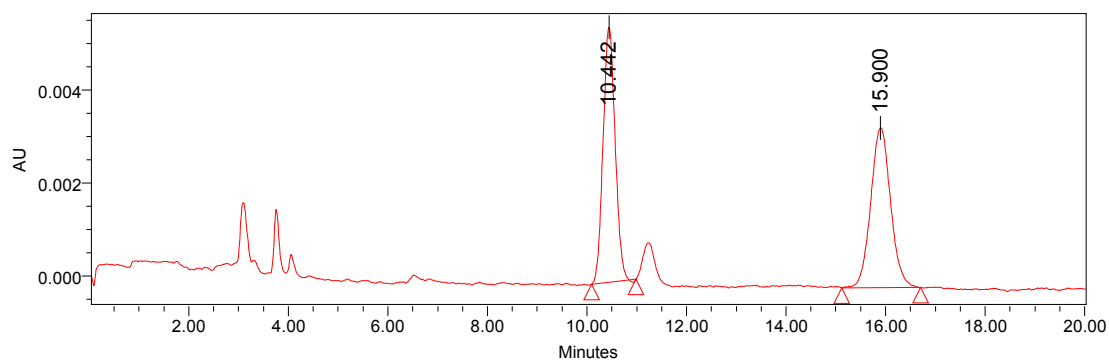

|   | Processed Channel | Retention Time (min) | Area  | % Area | Height |
|---|-------------------|----------------------|-------|--------|--------|
| 1 | PDA 255.3 nm      | 10.442               | 92660 | 49.30  | 5495   |
| 2 | PDA 255.3 nm      | 15.900               | 95302 | 50.70  | 3444   |

**Figure S46. Alkyne 3Cq enantioriched sample:** 92% ee.

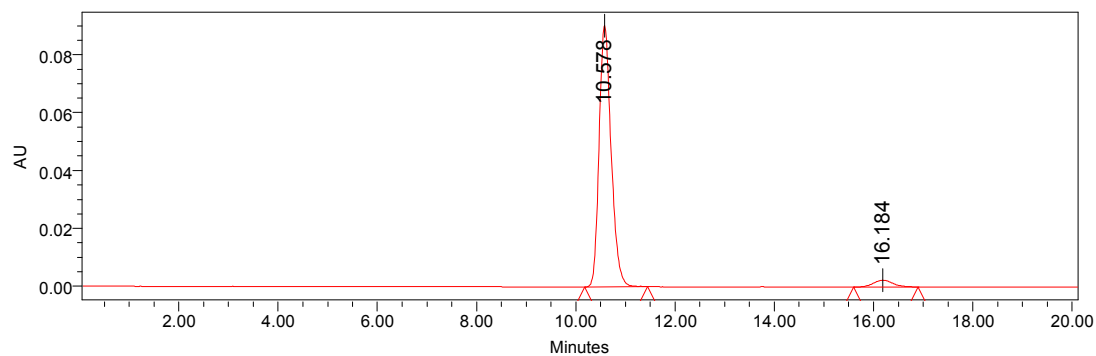

|   | Processed Channel | Retention Time (min) | Area    | % Area | Height |
|---|-------------------|----------------------|---------|--------|--------|
| 1 | PDA 260.3 nm      | 10.578               | 1510913 | 96.03  | 90441  |
| 2 | PDA 260.3 nm      | 16.184               | 62428   | 3.97   | 2333   |

**Figure S47. Alkyne 3Da racemic sample:** AD-H column, 85:15 *n*-Hex/*i*-PrOH, 30 °C, 1.0 mL/min

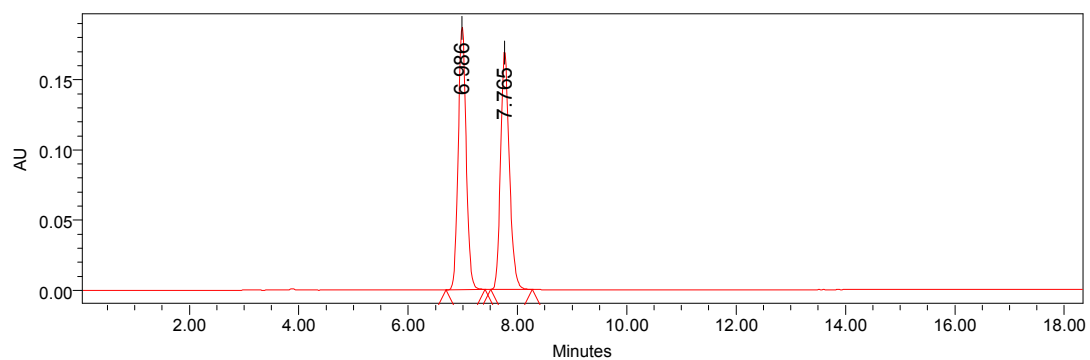

|   | Processed Channel | Retention Time (min) | Area    | % Area | Height |
|---|-------------------|----------------------|---------|--------|--------|
| 1 | PDA 276.0 nm      | 6.986                | 1903644 | 50.01  | 187258 |
| 2 | PDA 276.0 nm      | 7.765                | 1902650 | 49.99  | 169765 |

**Figure S48. Alkyne 3Da enantioriched sample: 95% ee.**

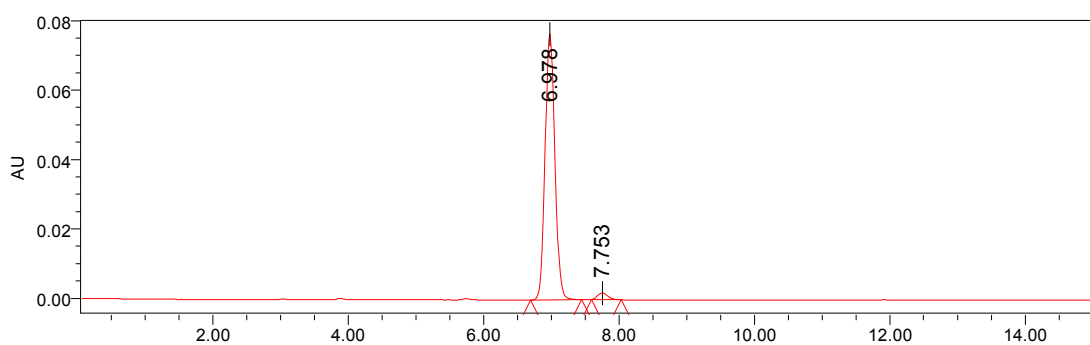

|   | Processed Channel | Retention Time (min) | Area   | % Area | Height |
|---|-------------------|----------------------|--------|--------|--------|
| 1 | PDA 276.0 nm      | 6.978                | 761396 | 97.51  | 76567  |
| 2 | PDA 276.0 nm      | 7.753                | 19476  | 2.49   | 1893   |

**Figure S49. Alkyne 3Dn racemic sample:** AD-H column, 85:15 *n*-Hex/*i*-PrOH, 30 °C, 1.0 mL/min

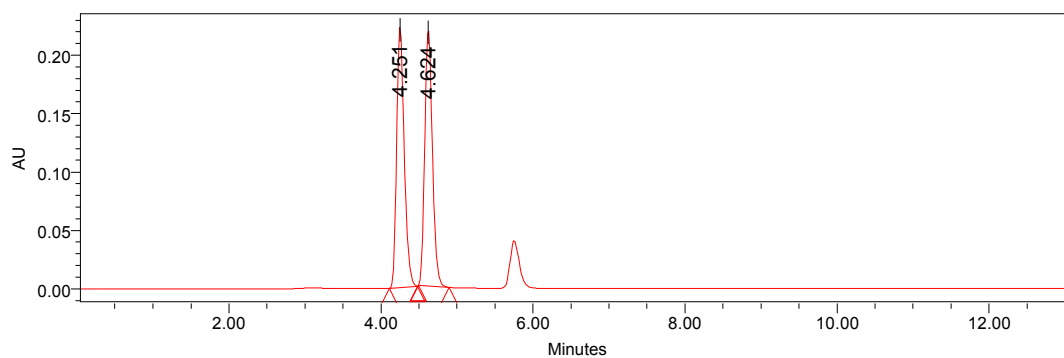

|   | Processed Channel | Retention Time (min) | Area    | % Area | Height |
|---|-------------------|----------------------|---------|--------|--------|
| 1 | PDA 245.0 nm      | 4.251                | 1533751 | 50.20  | 222980 |
| 2 | PDA 245.0 nm      | 4.624                | 1521799 | 49.80  | 218651 |

**Figure S50. Alkyne 3Dn enantioriched sample:** 88% ee.

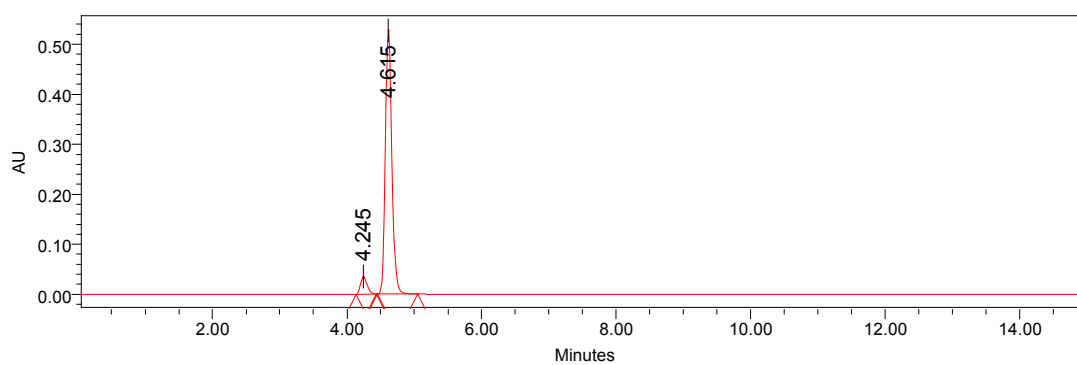

|   | Processed Channel | Retention Time (min) | Area    | % Area | Height |
|---|-------------------|----------------------|---------|--------|--------|
| 1 | PDA 250.0 nm      | 4.245                | 231231  | 6.10   | 35471  |
| 2 | PDA 250.0 nm      | 4.615                | 3561352 | 93.90  | 527630 |

**Figure S51. Alkyne 3Dq racemic sample:** OJ-H column, 99:1 *n*-Hex/*i*-PrOH, 30 °C, 1.0 mL/min

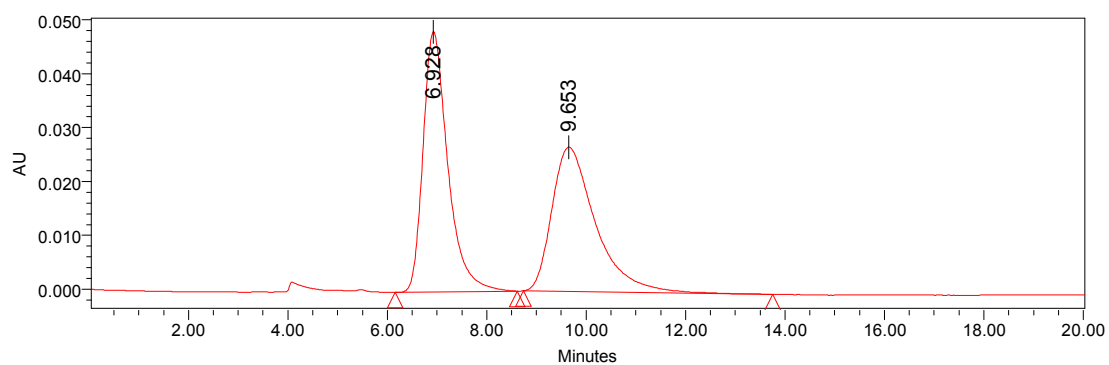

|   | Processed Channel | Retention Time (min) | Area    | % Area | Height |
|---|-------------------|----------------------|---------|--------|--------|
| 1 | PDA 254.0 nm      | 6.928                | 1670737 | 50.59  | 48348  |
| 2 | PDA 254.0 nm      | 9.653                | 1631902 | 49.41  | 26777  |

**Figure S52. Alkyne 3Dq enantioriched sample: 90% ee.**

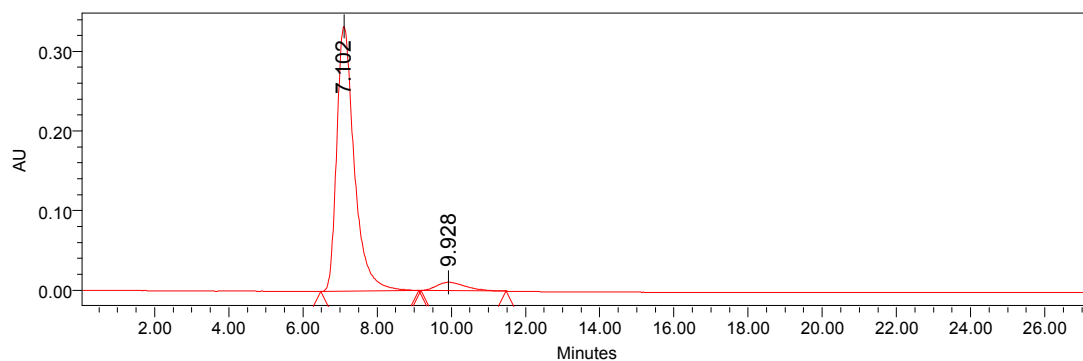

|   | Processed Channel | Retention Time (min) | Area     | % Area | Height |
|---|-------------------|----------------------|----------|--------|--------|
| 1 | PDA 254.0 nm      | 7.102                | 10938282 | 95.03  | 333149 |
| 2 | PDA 254.0 nm      | 9.928                | 571937   | 4.97   | 10490  |



**Figure S53. Alkyne 3Ea racemic sample:** AD-H column, 85:15 *n*-Hex/*i*-PrOH, 30 °C, 1.0 mL/min

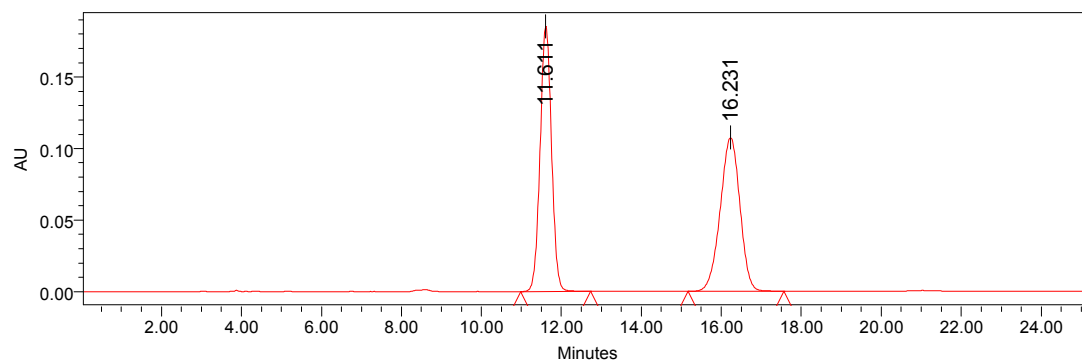

|   | Processed Channel | Retention Time (min) | Area    | % Area | Height |
|---|-------------------|----------------------|---------|--------|--------|
| 1 | PDA 284.0 nm      | 11.611               | 3671082 | 49.98  | 185636 |
| 2 | PDA 284.0 nm      | 16.231               | 3673301 | 50.02  | 107401 |

**Figure S54. Alkyne 3Ea enantioriched sample:** 95% ee.

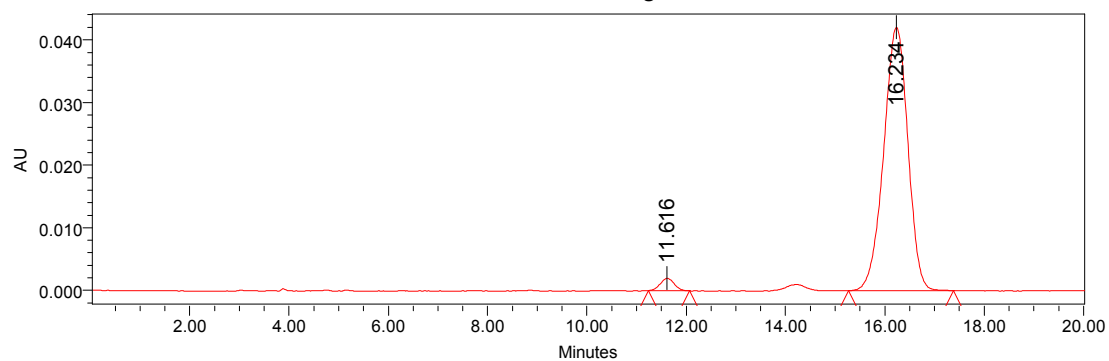

|   | Processed Channel | Retention Time (min) | Area    | % Area | Height |
|---|-------------------|----------------------|---------|--------|--------|
| 1 | PDA 284.0 nm      | 11.616               | 38350   | 2.63   | 1984   |
| 2 | PDA 284.0 nm      | 16.234               | 1422553 | 97.37  | 42049  |

**Figure S55. Alkyne 3En racemic sample:** AD-H column, 85:15 *n*-Hex/*i*-PrOH, 30 °C, 1.0 mL/min

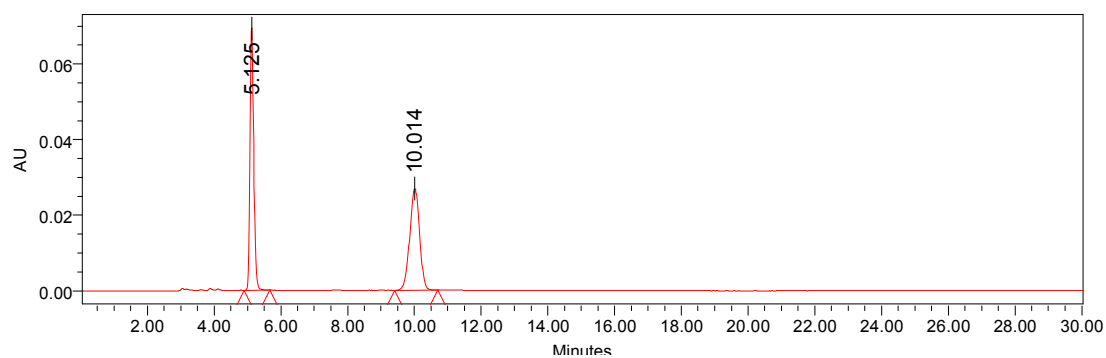

|   | Processed Channel | Retention Time (min) | Area   | % Area | Height |
|---|-------------------|----------------------|--------|--------|--------|
| 1 | PDA 252.0 nm      | 5.125                | 554047 | 50.10  | 69746  |
| 2 | PDA 252.0 nm      | 10.014               | 551890 | 49.90  | 26898  |

**Figure S56. Alkyne 3En enantioriched sample: 85% ee.**

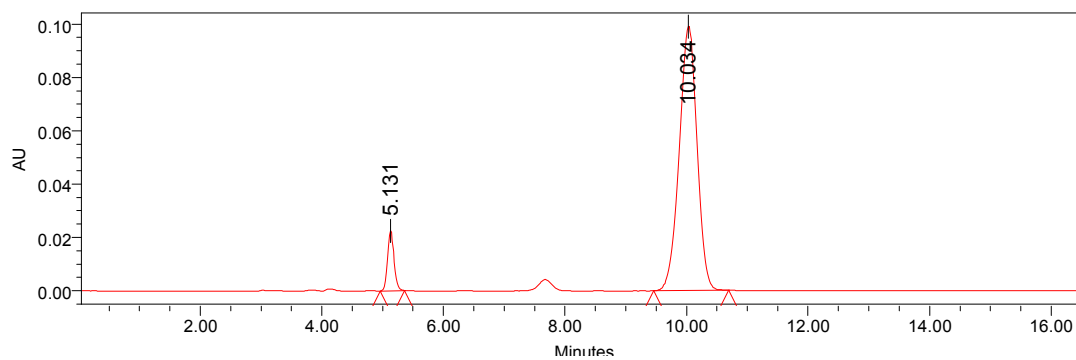

|   | Processed Channel | Retention Time (min) | Area    | % Area | Height |
|---|-------------------|----------------------|---------|--------|--------|
| 1 | PDA 252.0 nm      | 5.131                | 169785  | 7.74   | 22552  |
| 2 | PDA 252.0 nm      | 10.034               | 2024668 | 92.26  | 99255  |

**Figure S57. Alkyne 3Eq racemic sample:** AD-H column, 85:15 *n*-Hex/*i*-PrOH, 30 °C, 1.0 mL/min

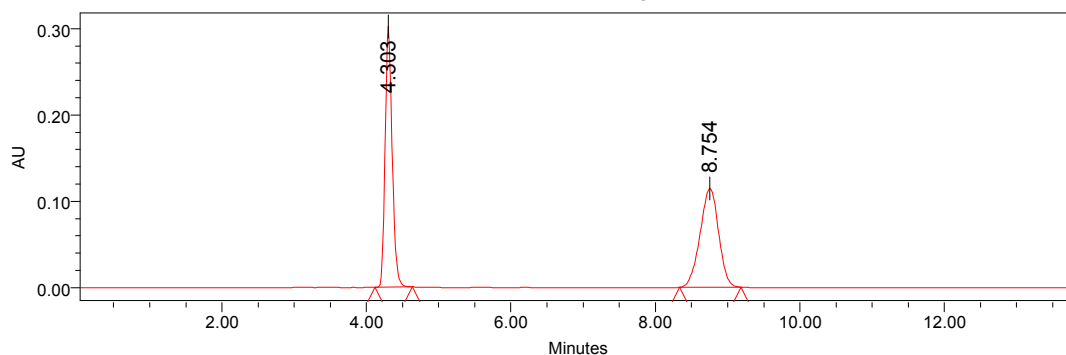

|   | Processed Channel | Retention Time (min) | Area    | % Area | Height |
|---|-------------------|----------------------|---------|--------|--------|
| 1 | PDA 259.0 nm      | 4.303                | 2051486 | 50.12  | 300974 |
| 2 | PDA 259.0 nm      | 8.754                | 2041736 | 49.88  | 114634 |

**Figure S58. Alkyne 3Eq enantioriched sample: 92% ee.**

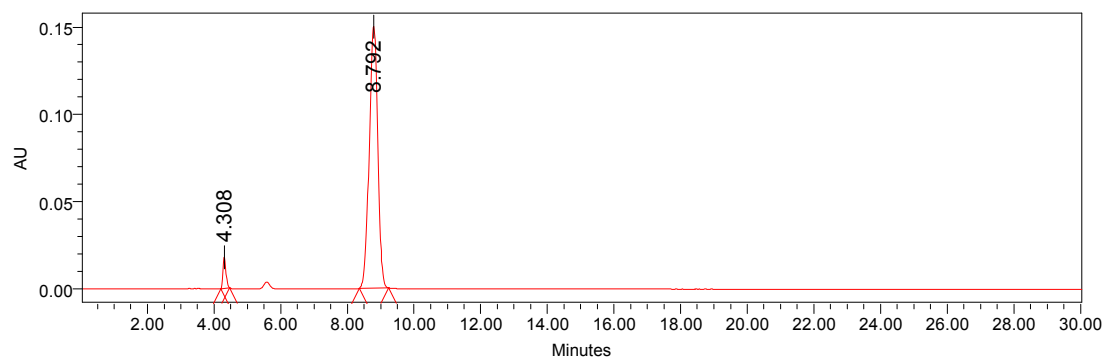

|   | Processed Channel | Retention Time (min) | Area    | % Area | Height |
|---|-------------------|----------------------|---------|--------|--------|
| 1 | PDA 259.0 nm      | 4.308                | 115389  | 4.15   | 18089  |
| 2 | PDA 259.0 nm      | 8.792                | 2663507 | 95.85  | 150288 |

**Figure S59. Alkyne 4A racemic sample:** AD-H column, 85:15 *n*-Hex/*i*-PrOH, 30 °C, 1.0 mL/min

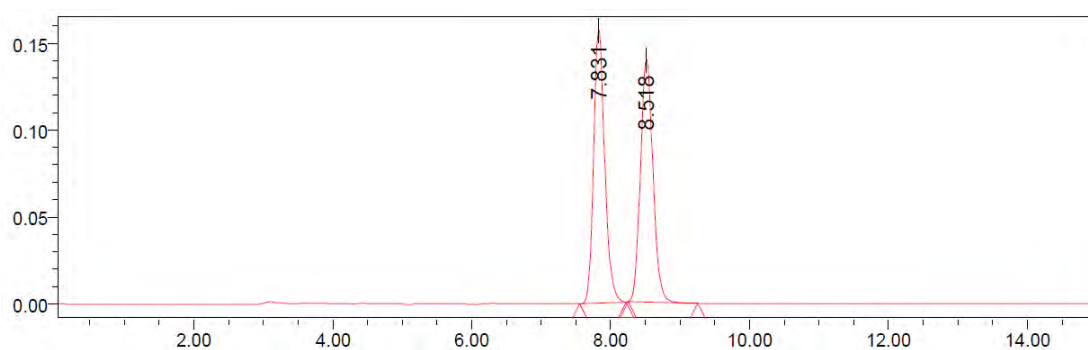

|   | Processed Channel | Retention Time (min) | Area    | % Area | Height |
|---|-------------------|----------------------|---------|--------|--------|
| 1 | PDA 246.0 nm      | 7.831                | 1748065 | 50.01  | 157639 |
| 2 | PDA 246.0 nm      | 8.518                | 1747665 | 49.99  | 139488 |

**Figure S60. Alkyne 4A enantioriched sample:** 97% ee. AD-H column, 85:15 *n*-Hex/*i*-PrOH, 30 °C, 1.0 mL/min

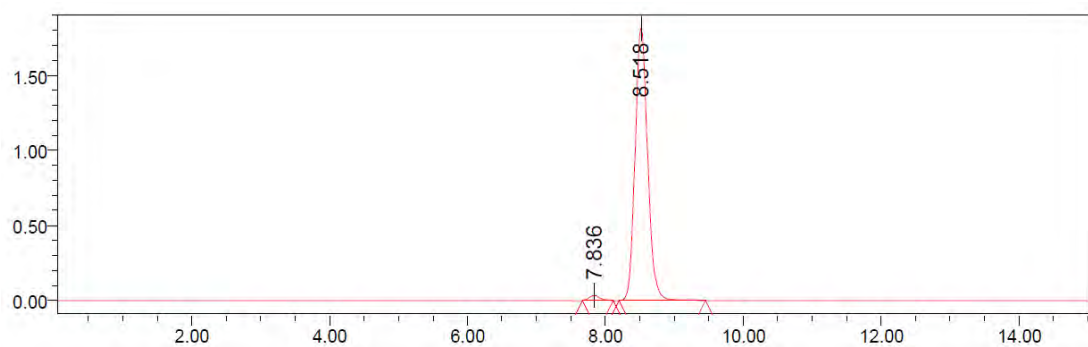

|   | Processed Channel | Retention Time (min) | Area     | % Area | Height  |
|---|-------------------|----------------------|----------|--------|---------|
| 1 | PDA 246.0 nm      | 7.836                | 336205   | 1.45   | 32389   |
| 2 | PDA 246.0 nm      | 8.518                | 22794678 | 98.55  | 1811892 |

**Figure S61. Alkyne 4B racemic sample:** AS-H column, 90:10 *n*-Hex/*i*-PrOH, 30 °C, 1 mL/min

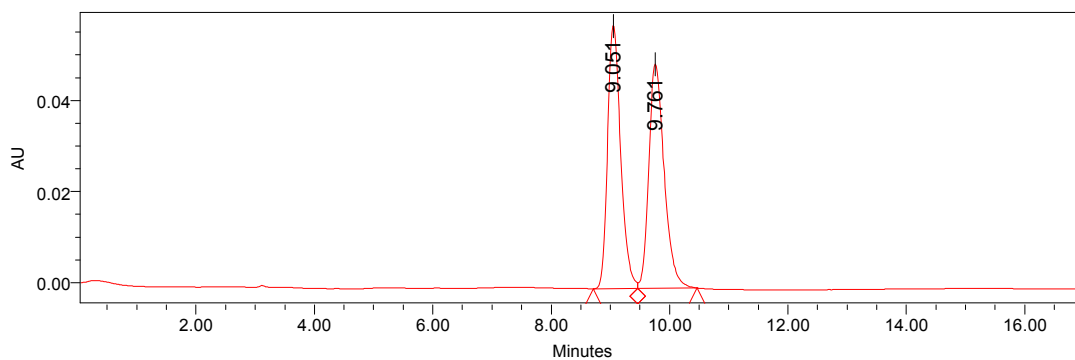

|   | Processed Channel | Retention Time (min) | Area   | % Area | Height |
|---|-------------------|----------------------|--------|--------|--------|
| 1 | PDA 244.6 nm      | 9.051                | 883588 | 49.88  | 57916  |
| 2 | PDA 244.6 nm      | 9.761                | 887805 | 50.12  | 49297  |

**Figure S62. Alkyne 4B enantioriched sample:** 95% ee.

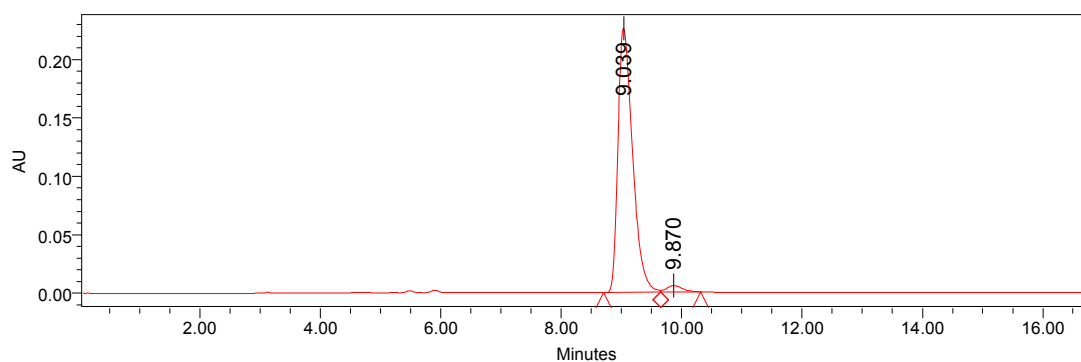

|   | Processed Channel | Retention Time (min) | Area    | % Area | Height |
|---|-------------------|----------------------|---------|--------|--------|
| 1 | PDA 273.9 nm      | 9.039                | 3814072 | 97.42  | 226640 |
| 2 | PDA 273.9 nm      | 9.870                | 101209  | 2.58   | 5485   |

**Figure S63. Alkyne 4C racemic sample:** AD-H column, 80:20 *n*-Hex/*i*-PrOH, 30 °C, 1 mL/min

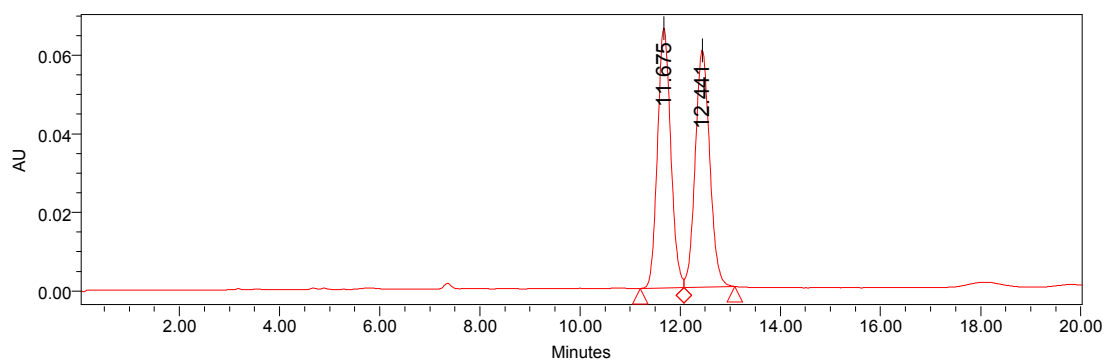

|   | Processed Channel | Retention Time (min) | Area    | % Area | Height |
|---|-------------------|----------------------|---------|--------|--------|
| 1 | PDA 242.3 nm      | 11.675               | 1208774 | 49.94  | 66189  |
| 2 | PDA 242.3 nm      | 12.441               | 1211603 | 50.06  | 60265  |

**Figure S64. Alkyne 4C enantioriched sample:** 92% ee.

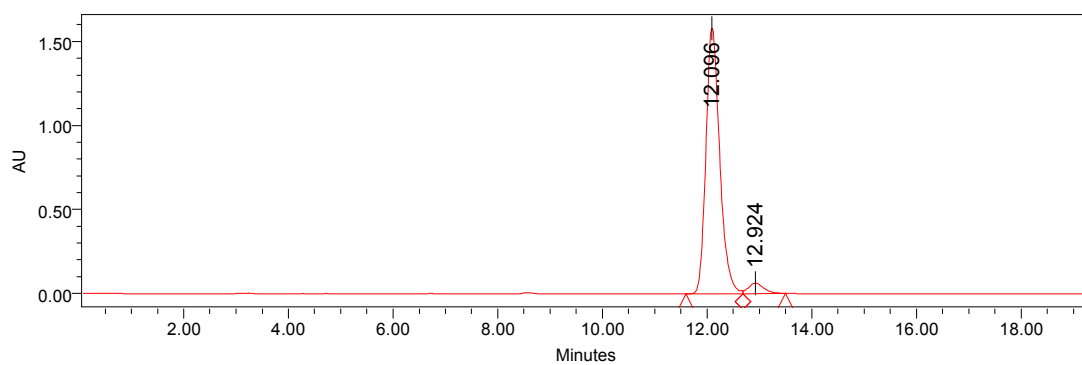

|   | Processed Channel | Retention Time (min) | Area     | % Area | Height  |
|---|-------------------|----------------------|----------|--------|---------|
| 1 | PDA 219.1 nm      | 12.096               | 28855868 | 95.85  | 1583123 |
| 2 | PDA 219.1 nm      | 12.924               | 1248875  | 4.15   | 61685   |

**Figure S65. Alkene 5 racemic sample:** OD column, 90:10 *n*-Hex/*i*-PrOH, 30 °C, 1 mL/min

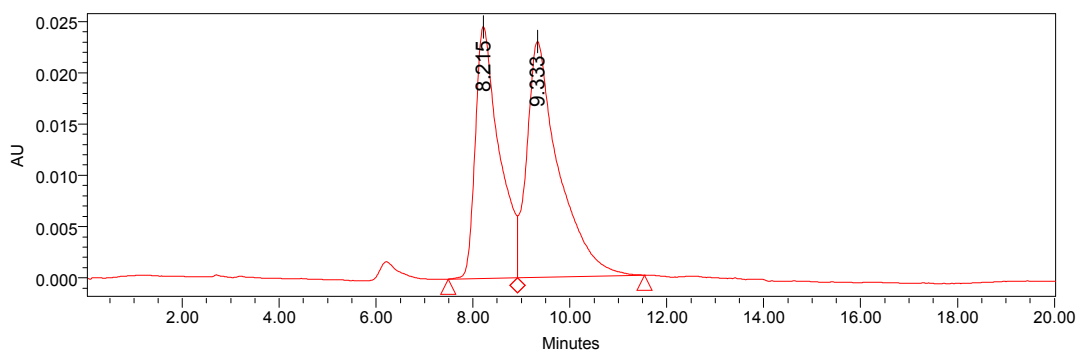

|   | Processed Channel | Retention Time (min) | Area    | % Area | Height |
|---|-------------------|----------------------|---------|--------|--------|
| 1 | PDA 257.4 nm      | 8.215                | 837605  | 44.44  | 24569  |
| 2 | PDA 257.4 nm      | 9.333                | 1047007 | 55.56  | 23002  |

**Figure S66. Alkene 5 enantioriched sample: 97% ee.**

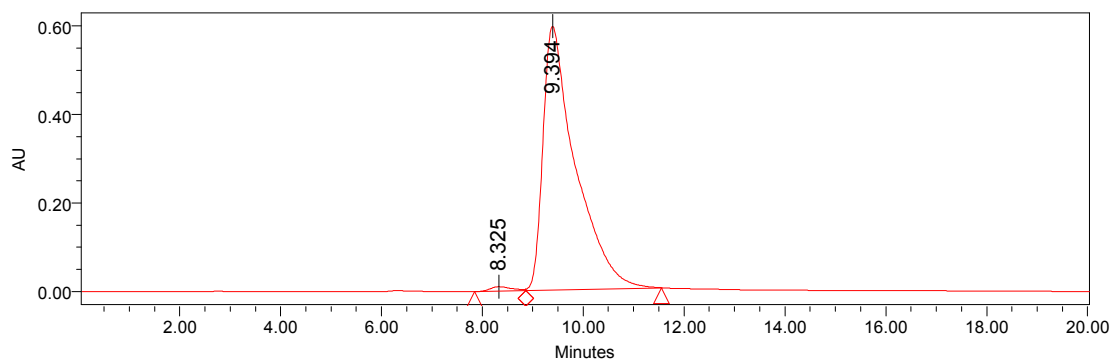

|   | Processed Channel | Retention Time (min) | Area     | % Area | Height |
|---|-------------------|----------------------|----------|--------|--------|
| 1 | PDA 247.9 nm      | 8.325                | 286085   | 1.06   | 9946   |
| 2 | PDA 247.9 nm      | 9.394                | 26666475 | 98.94  | 596370 |

**Figure S67. Compound 6 racemic sample:** AD-H column, *n*-Hex/*i*-PrOH 85:15, 30 °C, 1.0 mL/min

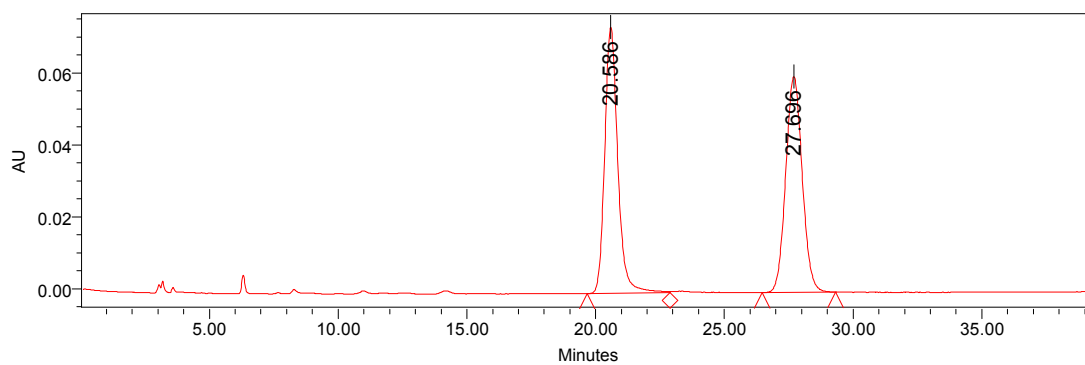

|   | Processed Channel | Retention Time (min) | Area    | % Area | Height |
|---|-------------------|----------------------|---------|--------|--------|
| 1 | PDA 218.3 nm      | 20.586               | 2610370 | 49.45  | 74050  |
| 2 | PDA 218.3 nm      | 27.696               | 2668739 | 50.55  | 59986  |

**Figure S68. Compound 6 enantioriched sample: 97% ee.**

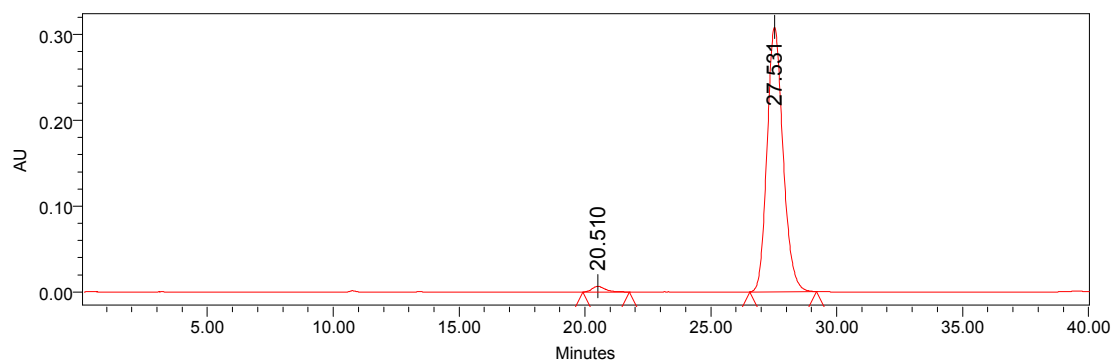

|   | Processed Channel | Retention Time (min) | Area     | % Area | Height |
|---|-------------------|----------------------|----------|--------|--------|
| 1 | PDA 245.0 nm      | 20.510               | 229554   | 1.66   | 6524   |
| 2 | PDA 245.0 nm      | 27.531               | 13590233 | 98.34  | 308562 |



**Figure S69. Compound 7 racemic sample:** AD-H column, 70:30 *n*-Hex/*i*-PrOH, 30 °C, 1.0 mL/min

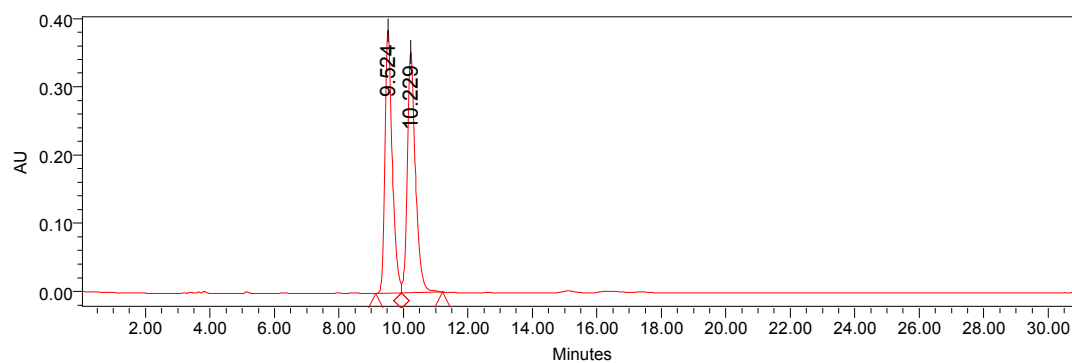

|   | Processed Channel | Retention Time (min) | Area    | % Area | Height |
|---|-------------------|----------------------|---------|--------|--------|
| 1 | PDA 219.0 nm      | 9.524                | 6111386 | 49.55  | 385522 |
| 2 | PDA 219.0 nm      | 10.229               | 6223264 | 50.45  | 352982 |

**Figure S70. Compound 7 enantioriched sample:** 97% ee.

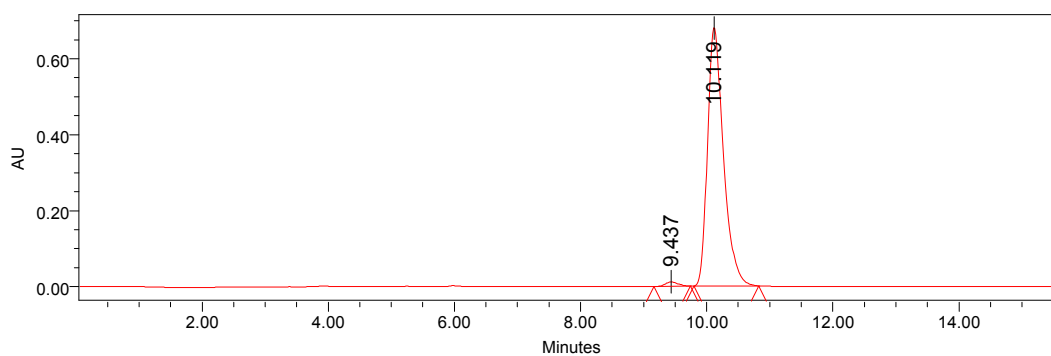

|   | Processed Channel | Retention Time (min) | Area     | % Area | Height |
|---|-------------------|----------------------|----------|--------|--------|
| 1 | PDA 242.6 nm      | 9.437                | 177069   | 1.46   | 12138  |
| 2 | PDA 242.6 nm      | 10.119               | 11928061 | 98.54  | 682117 |

---

## References:

- 1 A. Alexakis, J. Burton, J. Vastra, C. Benhaim, X. Fournioux, A. van den Heuvel, J.-M. Levêque, F. Mazeé and S. Rosset, *Eur. J. Org. Chem.* 2000, 4011–4027.
- 2 A. Ros, B. Estepa, A. Bermejo, E. Álvarez, R. Fernández and J. M. Lassaletta, *J. Org. Chem.* 2012, **77**, 4740–4750.
- 3 a) D. J. Connolly, P. M. Lacey, M. McCarthy, C. P. Saunders, A-M. Carroll, R. Goddard and P. J. Guiry, *J. Org. Chem.* 2004, **69**, 6572–6589; b) A. Ros, B. Estepa, P. Ramírez-López, E. Álvarez, R. Fernández and J. M. Lassaletta, *J. Am. Chem. Soc.* 2013, **135**, 15730–15733.
- 4 P. Ramírez-López, A. Ros, B. Estepa, R. Fernández, B. Fiser, E. Gómez-Bengoa and J. M. Lassaletta, *ACS Catal.* 2016, **6**, 3955–3964.
- 5 V. F. Pais, H. S. El-Sheshtawy, R. Fernández, J. M. Lassaletta, A. Ros and U. Pischel, *Chem. Eur. J.* 2013, **19**, 6650–6661.
- 6 S. Shekhar, Dunn, T. B.; Kotecki, B. J.; Montavon and D. K.; Cullen, S. C. *J. Org. Chem.* 2011, **76**, 4552–4563.
- 7 C. W. Lim, O. Tissot, A. Mattison, M. W. Hooper, J. M. Brown, A. R. Cowley, D. I. Hulmes and A. J. Blacker, *Org. Process Res. Dev.*, 2003, **7**, 379–384.
- 8 A. M. Whittaker and G. Lalic, *Org. Lett* 2013, **15**, 1112–1115.
